# Supplementary material for: m6A-dependent glycolysis enhances colorectal cancer progression
Source: PubMed Central journal article supplement (PMC7118901; doi:10.1186/s12943-020-01190-w), 2020-04-03

Figure S1

**a**

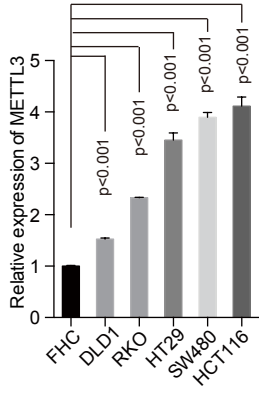

**b**

HCT116 WT

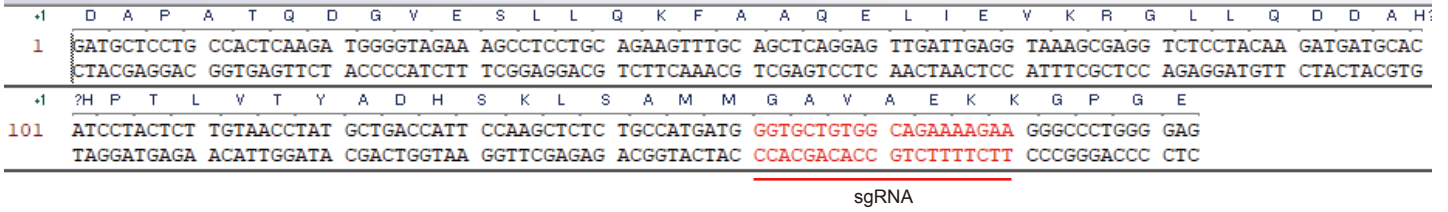

HCT116 METTL3-KO

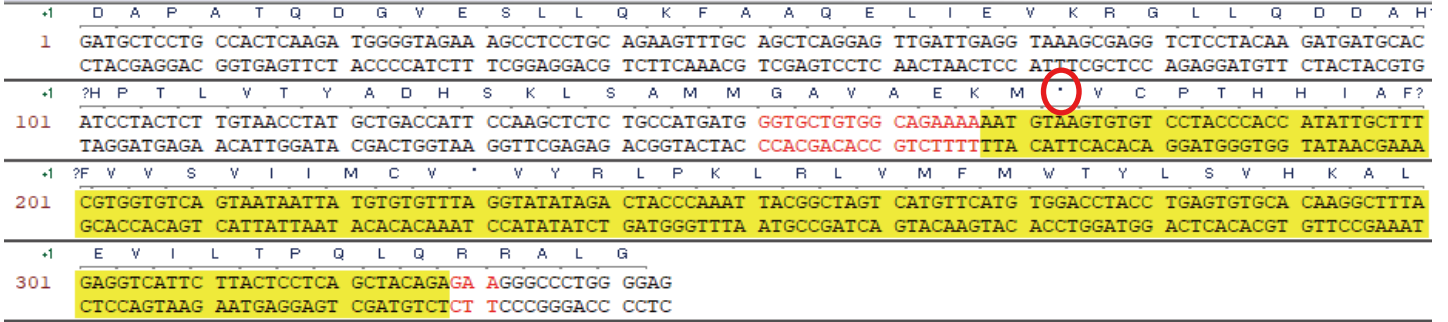

**c**

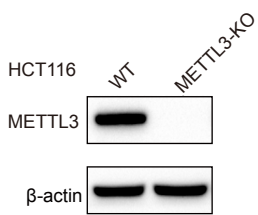

**d**

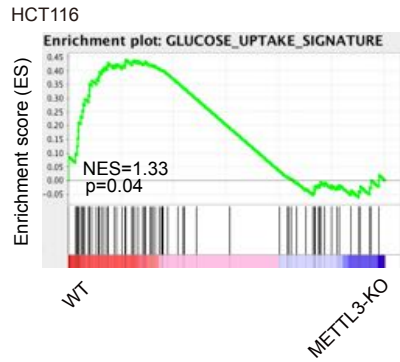

Figure S2

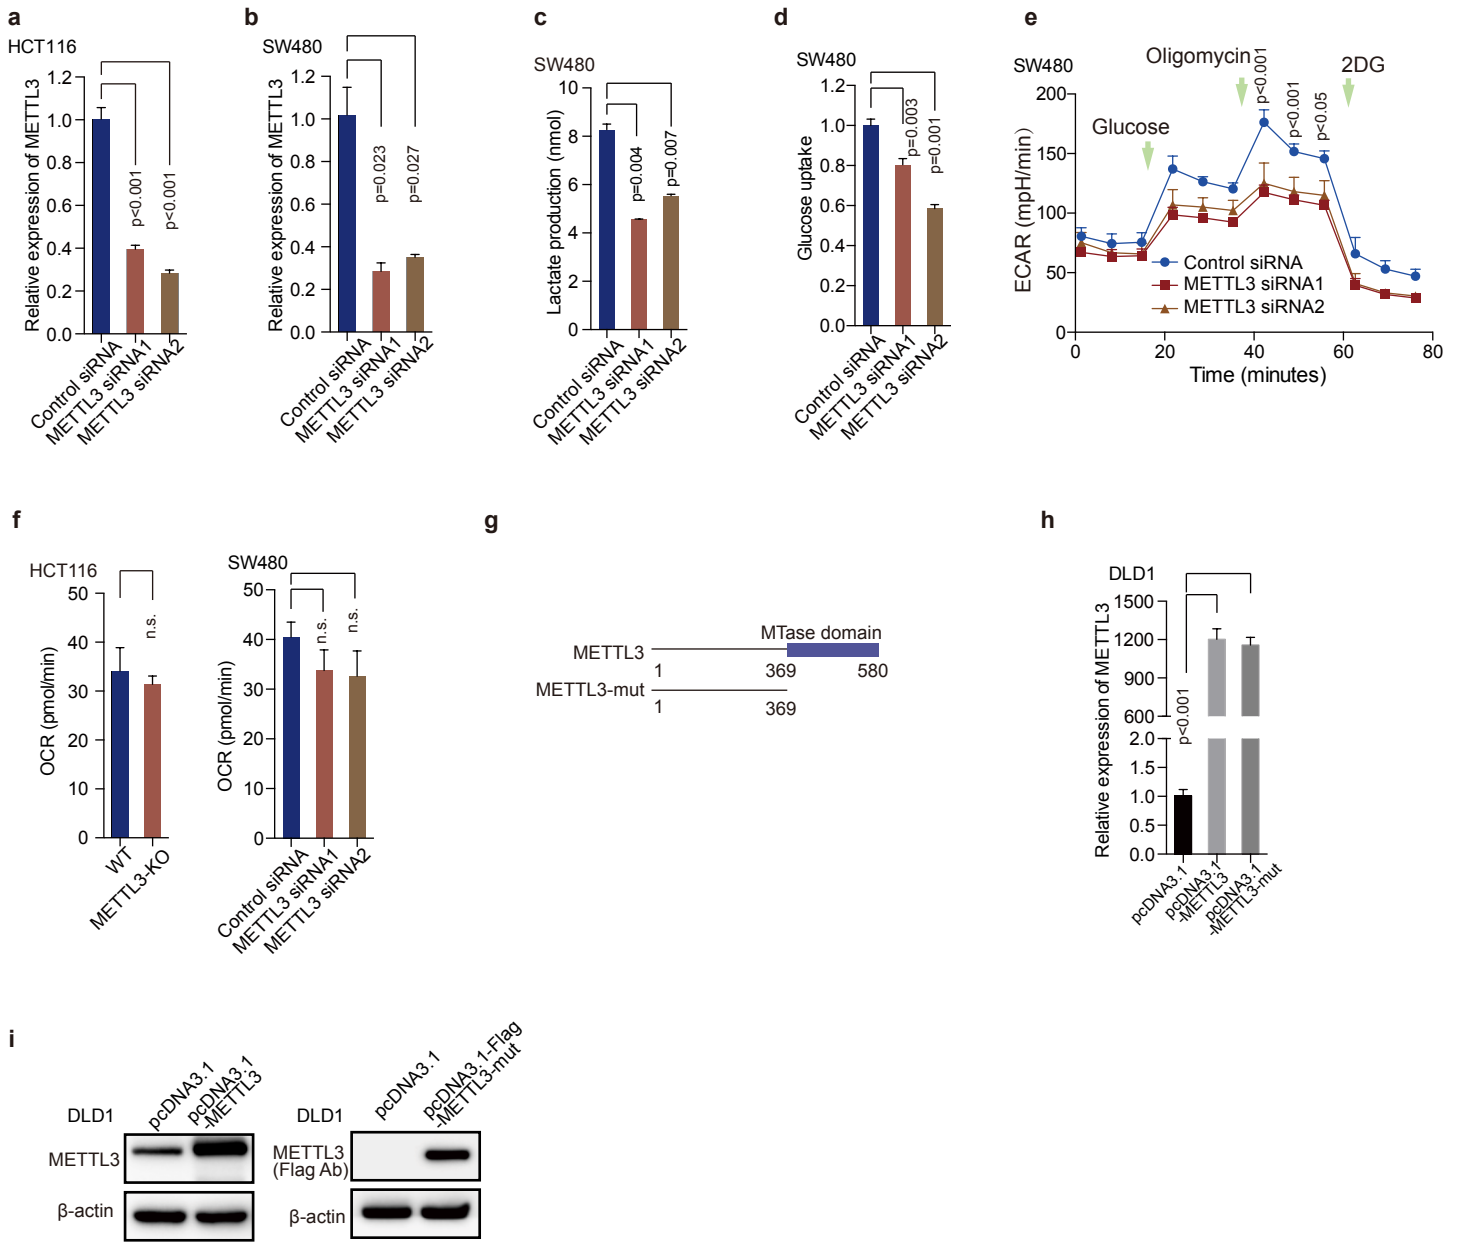

Figure S3

**a**

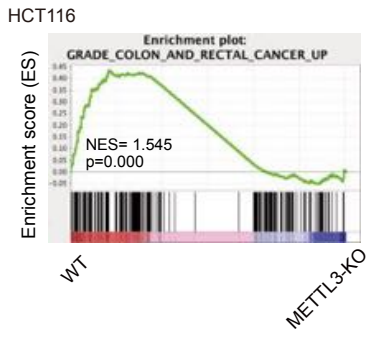

**b**

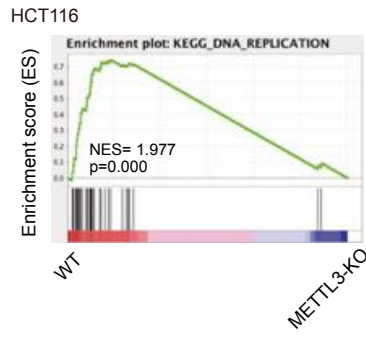

**c**

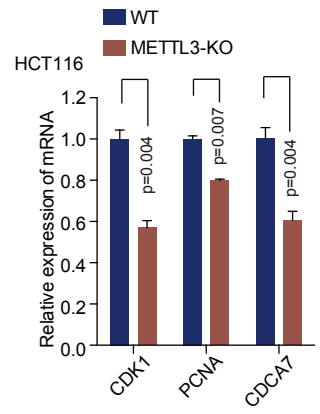

**d**

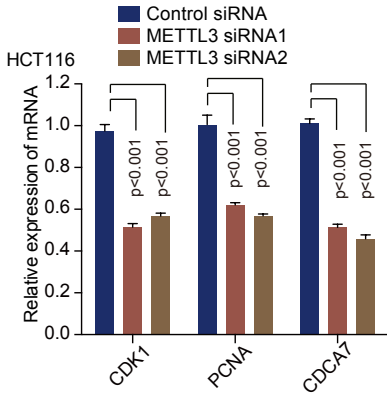

**e**

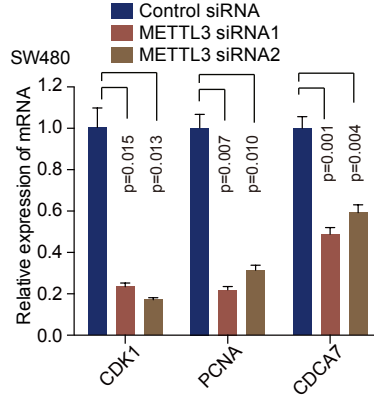

**f**

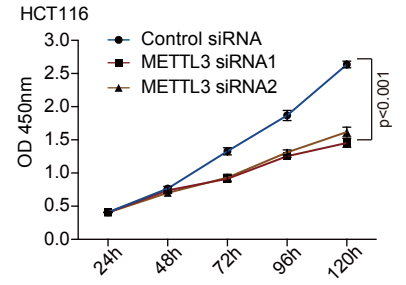

**g**

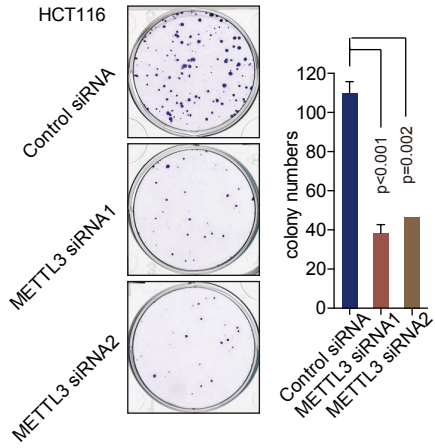

**h**

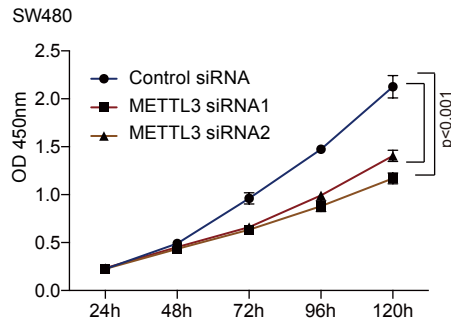

**i**

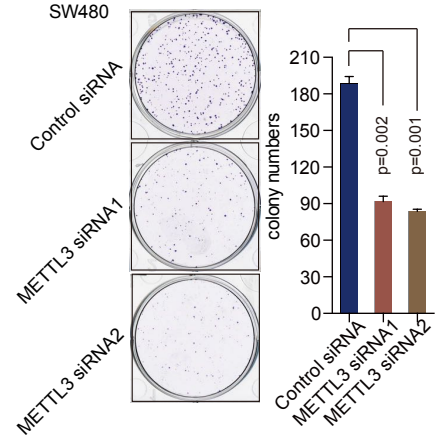

**j**

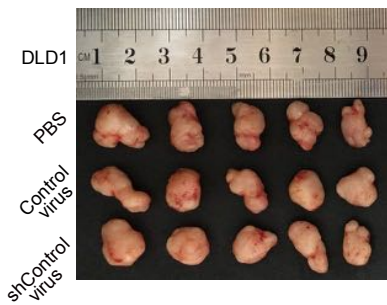

**k**

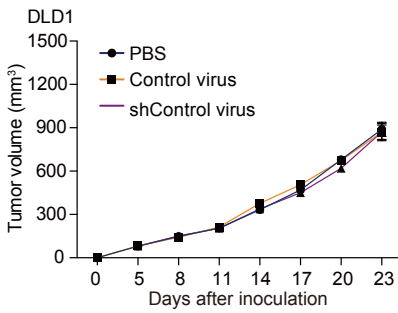

**l**

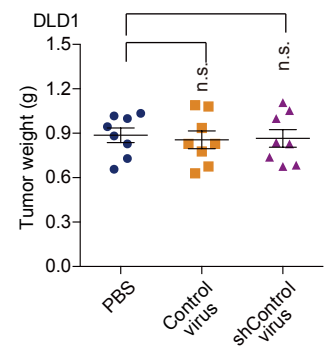

Figure S4

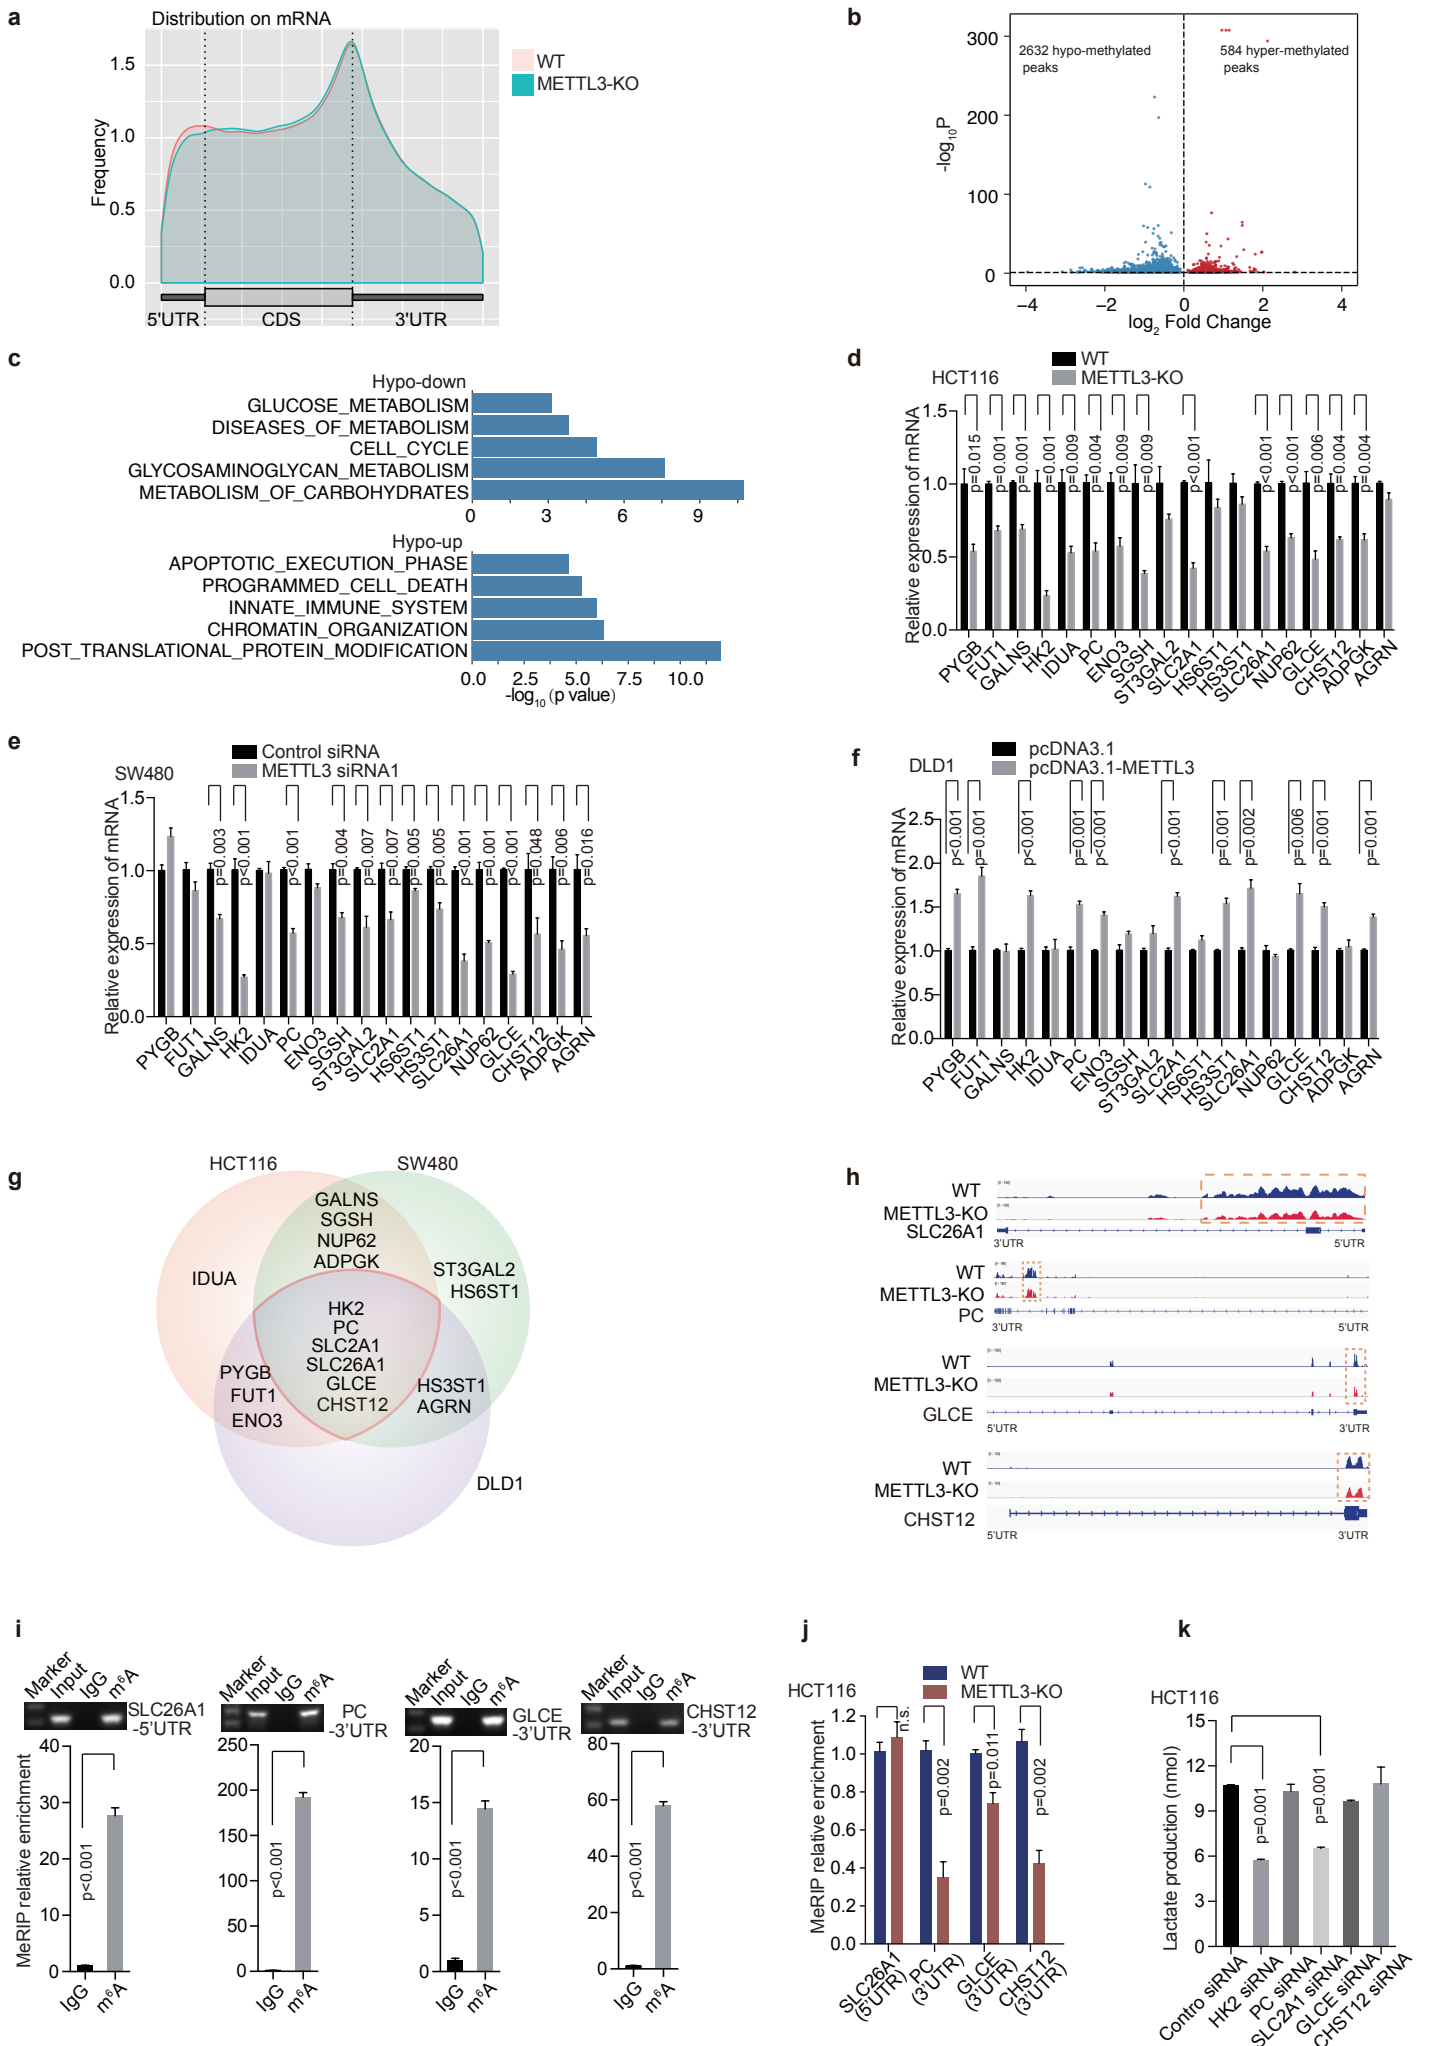

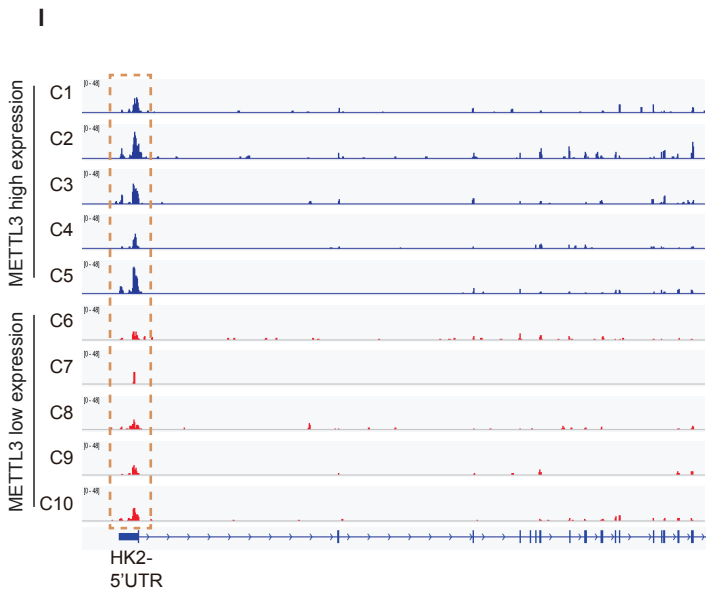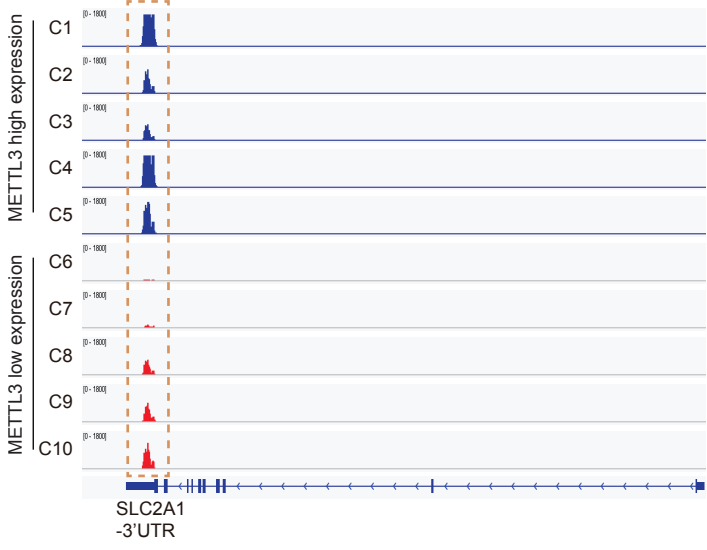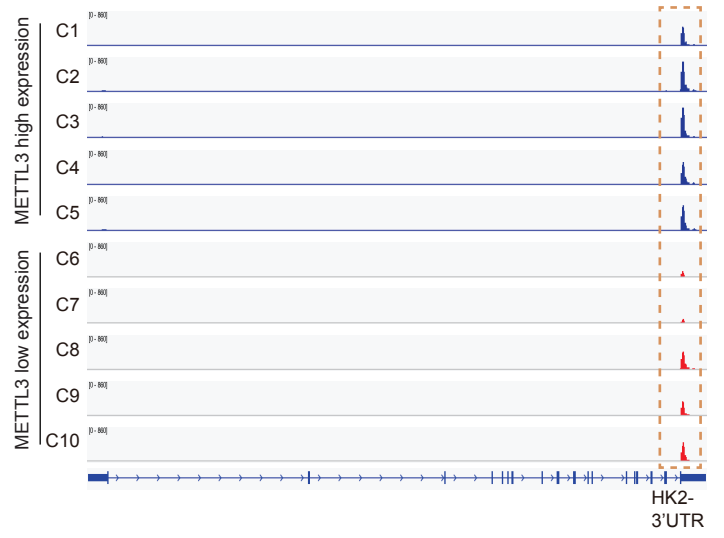

Figure S5

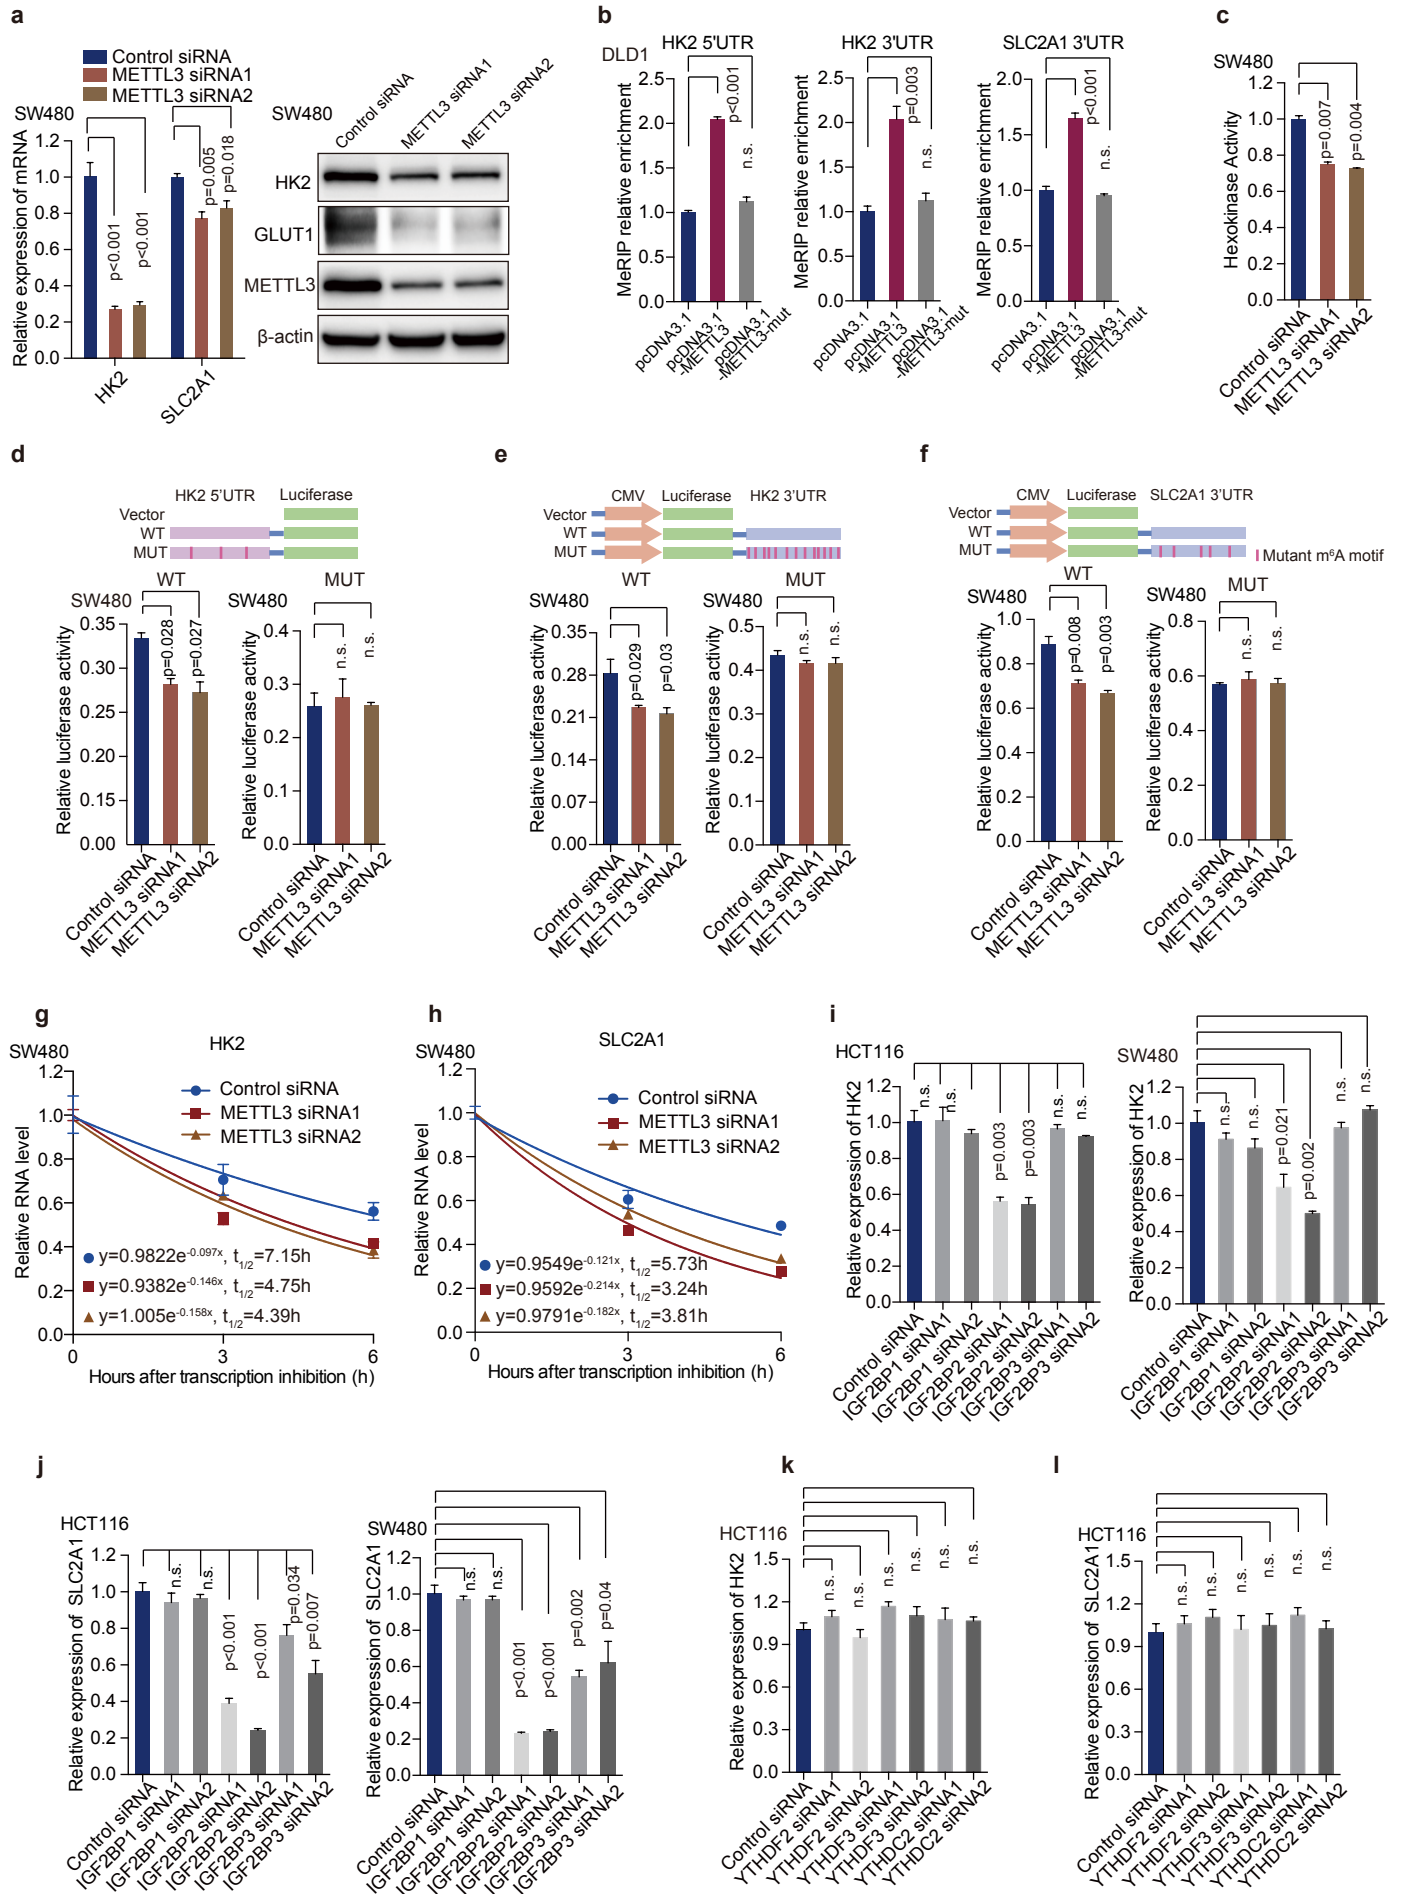

Figure S6

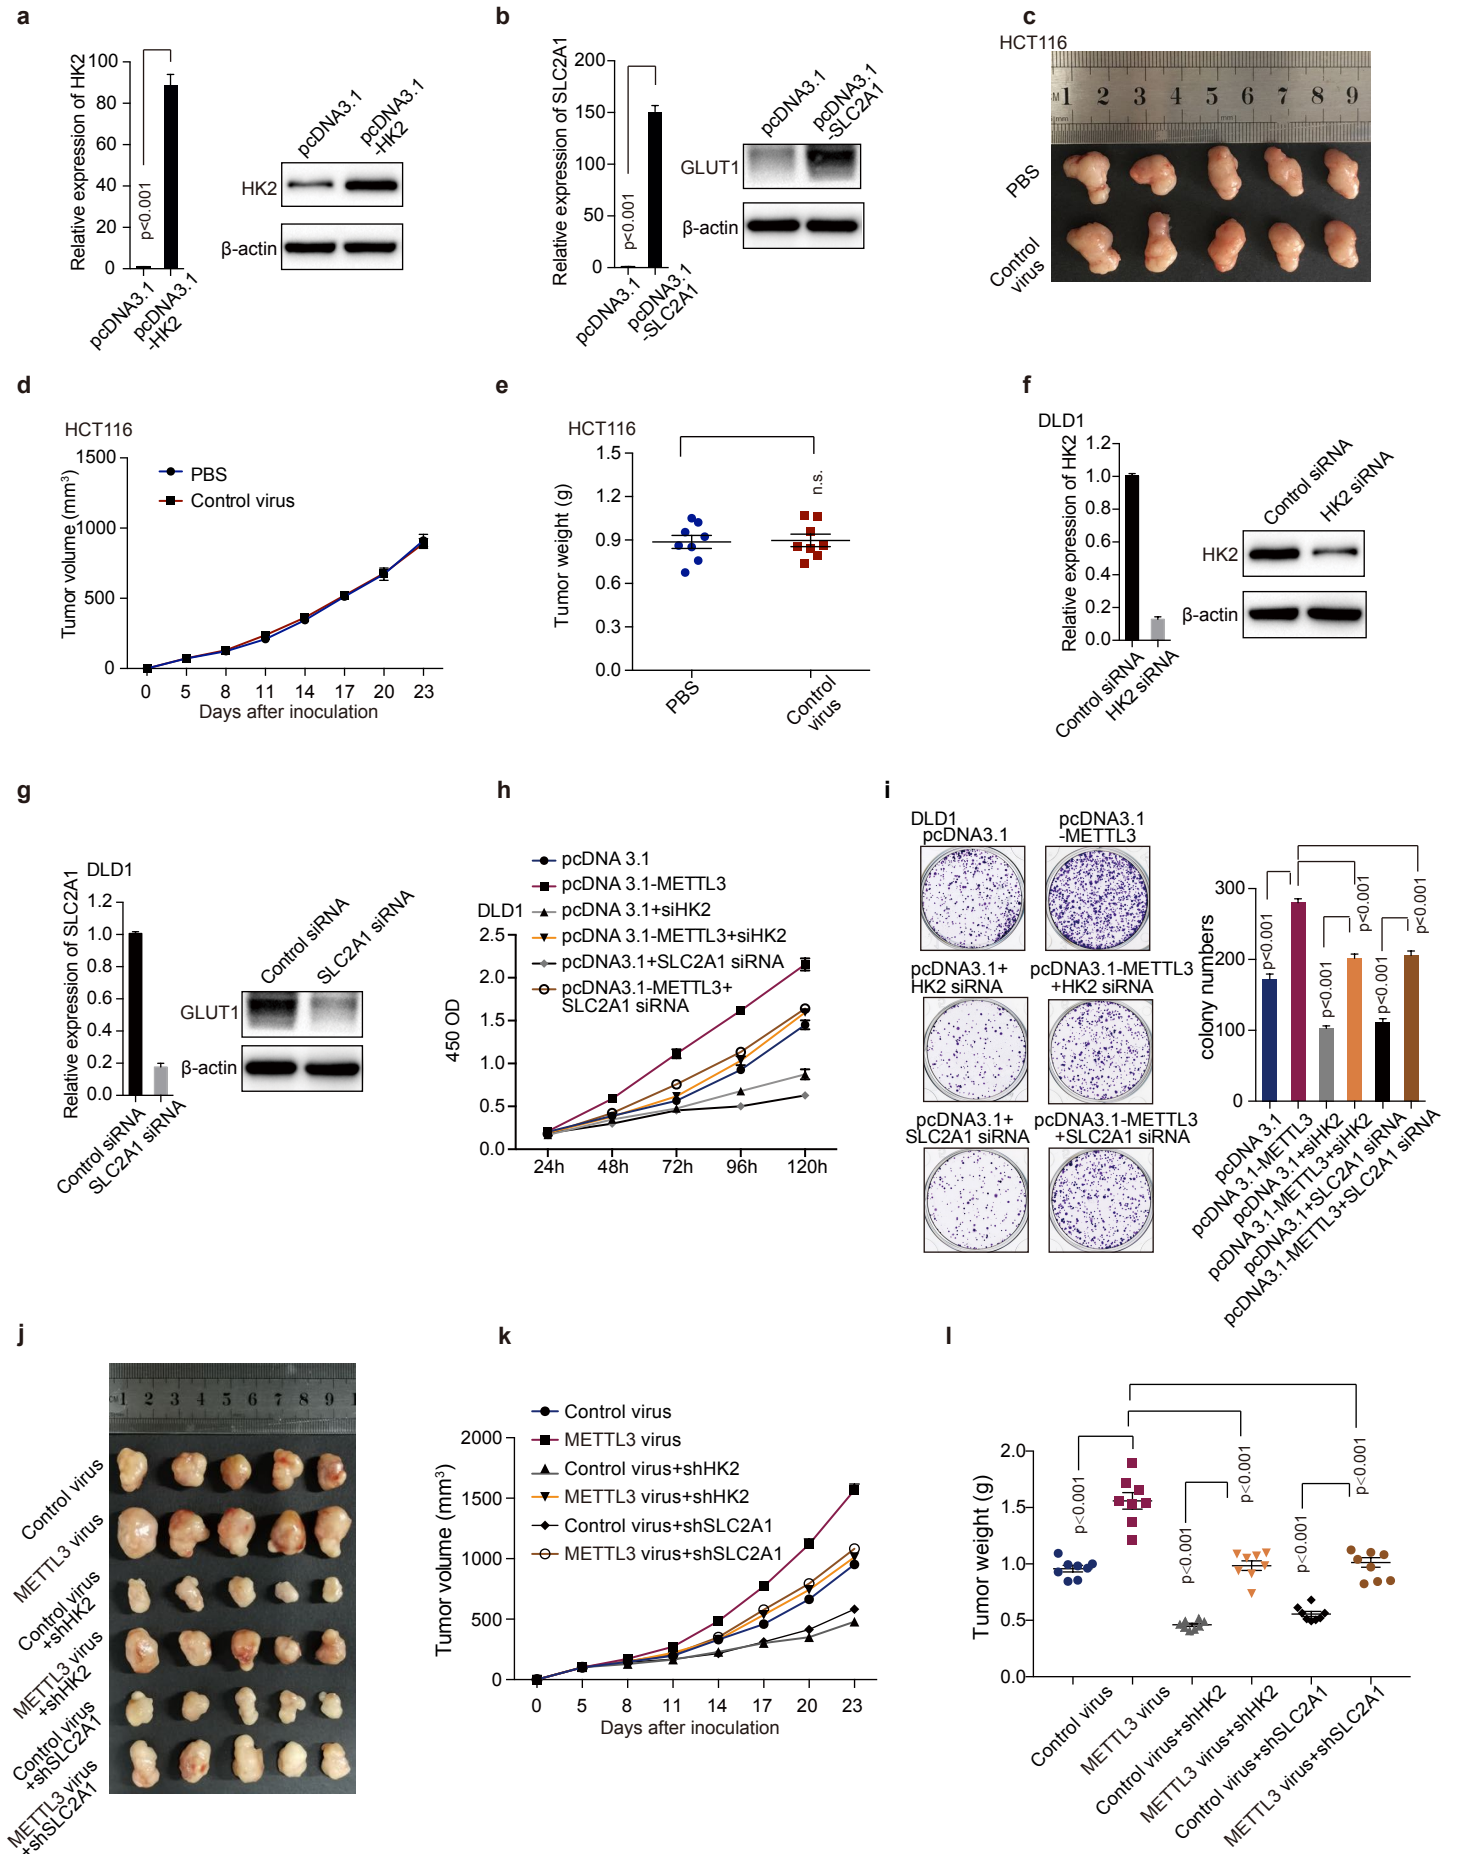



Figure S7

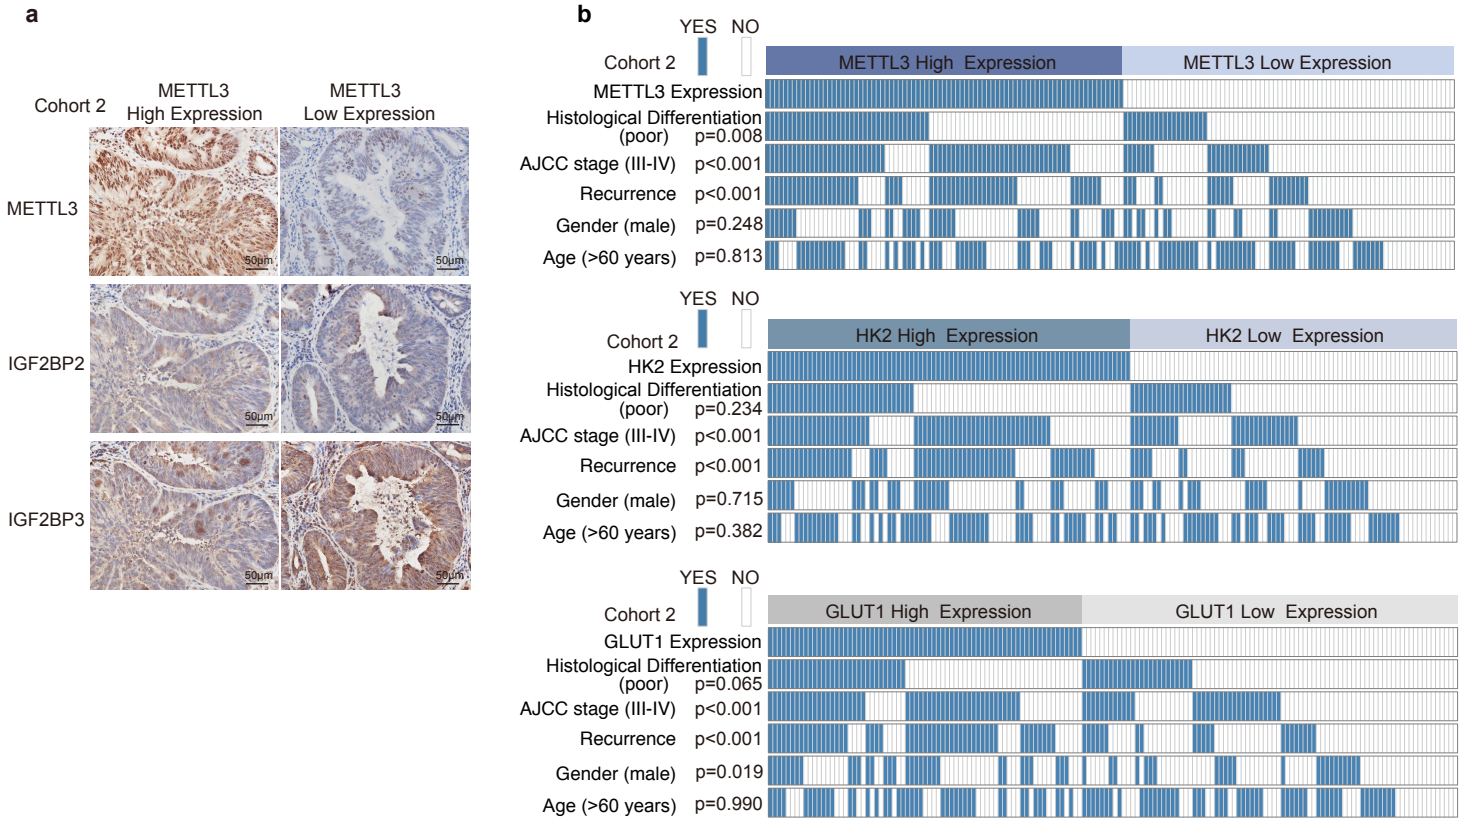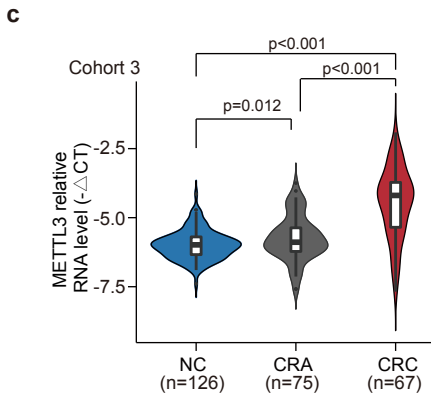

Supplement: 12943_2020_1190_MOESM3_ESM.pdf [file 12943_2020_1190_MOESM3_ESM.pdf]
