# Supplementary material for: m6A-dependent glycolysis enhances colorectal cancer progression
Source: Mol Cancer. 2020 Apr 3;19:72. doi: 10.1186/s12943-020-01190-w (PMC7118901; doi:10.1186/s12943-020-01190-w)
Supplement: Supplementary file 4 — Additional file 4 Table S2. Pathways regulated by METTL3 in HCT116 cells. [file 12943_2020_1190_MOESM4_ESM.xlsx]

## Sheet: Table S2
Table S2. Pathways regulated by METTL3 in HCT116 cells.
Pathway	logFC	AveExpr	t-Statistics	P.Value	adj.P.Val
REACTOME_REGULATION_OF_INSULIN_SECRETION_BY_ACETYLCHOLINE	0.0597799	0.230205	38.288	1.04e-08	4.92e-05
FERRARI_RESPONSE_TO_FENRETINIDE_DN	0.0790202	0.13183	34.0472	2.17e-08	5.14e-05
REACTOME_POL_SWITCHING	-0.0467165	0.246387	-30.607	4.24e-08	5.55e-05
PLASARI_NFIC_TARGETS_BASAL_DN	0.0674325	0.144411	30.1193	4.69e-08	5.55e-05
STONER_ESOPHAGEAL_CARCINOGENESIS_DN	-0.0392191	0.287405	-27.9466	7.5e-08	7.09e-05
REACTOME_G2_M_CHECKPOINTS	-0.0412501	0.276908	-26.6775	1e-07	7.14e-05
REN_BOUND_BY_E2F	-0.0379845	0.286731	-26.2957	1.1e-07	7.14e-05
KEGG_MISMATCH_REPAIR	-0.0399669	0.264889	-25.5167	1.33e-07	7.14e-05
REACTOME_E2F_ENABLED_INHIBITION_OF_PRE_REPLICATION_COMPLEX_FORMATION	-0.0377133	0.25984	-24.1554	1.87e-07	7.14e-05
OSADA_ASCL1_TARGETS_DN	0.0373299	0.217843	23.9846	1.95e-07	7.14e-05
ISHIDA_E2F_TARGETS	-0.0450964	0.337465	-23.6672	2.12e-07	7.14e-05
REACTOME_ACTIVATION_OF_ATR_IN_RESPONSE_TO_REPLICATION_STRESS	-0.0399696	0.261188	-23.5865	2.17e-07	7.14e-05
WANG_RECURRENT_LIVER_CANCER_DN	0.0393327	0.247262	23.459	2.24e-07	7.14e-05
REACTOME_ACTIVATION_OF_THE_PRE_REPLICATIVE_COMPLEX	-0.0391037	0.257708	-23.2819	2.35e-07	7.14e-05
CHEN_HOXA5_TARGETS_6HR_UP	0.046165	0.207455	23.1207	2.45e-07	7.14e-05
REACTOME_E2F_MEDIATED_REGULATION_OF_DNA_REPLICATION	-0.036707	0.264751	-22.8507	2.64e-07	7.14e-05
REACTOME_DNA_STRAND_ELONGATION	-0.0439341	0.281591	-22.7177	2.74e-07	7.14e-05
SCHMIDT_POR_TARGETS_IN_LIMB_BUD_UP	0.045076	0.284075	22.6684	2.78e-07	7.14e-05
CROONQUIST_IL6_DEPRIVATION_DN	-0.039977	0.303855	-22.55	2.87e-07	7.14e-05
ZHOU_CELL_CYCLE_GENES_IN_IR_RESPONSE_6HR	-0.0386157	0.273971	-22.2841	3.09e-07	7.21e-05
KAUFFMANN_MELANOMA_RELAPSE_UP	-0.0379203	0.269069	-22.1569	3.2e-07	7.21e-05
YU_BAP1_TARGETS	-0.0316178	0.239421	-21.3491	4.03e-07	8.54e-05
KEGG_DNA_REPLICATION	-0.0383077	0.278177	-21.175	4.25e-07	8.54e-05
BURTON_ADIPOGENESIS_3	-0.033549	0.304367	-21.1034	4.34e-07	8.54e-05
DE_YY1_TARGETS_UP	0.0494587	0.114146	20.8219	4.71e-07	8.54e-05
UZONYI_RESPONSE_TO_LEUKOTRIENE_AND_THROMBIN	0.0332717	0.122362	20.8028	4.74e-07	8.54e-05
REACTOME_LAGGING_STRAND_SYNTHESIS	-0.0449728	0.266467	-20.7089	4.88e-07	8.54e-05
WHITFIELD_CELL_CYCLE_LITERATURE	-0.0316845	0.30447	-20.0907	5.89e-07	9.43e-05
CROONQUIST_NRAS_SIGNALING_DN	-0.0396647	0.336117	-20.0436	5.98e-07	9.43e-05
KUMAMOTO_RESPONSE_TO_NUTLIN_3A_UP	-0.0378539	0.230754	-20.0392	5.98e-07	9.43e-05
WILLIAMS_ESR1_TARGETS_DN	0.0404699	0.274792	19.8869	6.28e-07	9.57e-05
MAHADEVAN_RESPONSE_TO_MP470_DN	0.0330452	0.176254	19.635	6.79e-07	0.00010039
LIANG_SILENCED_BY_METHYLATION_DN	-0.0432554	0.369522	-19.5094	7.07e-07	0.000101312
CROSBY_E2F4_TARGETS	-0.0446182	0.330268	-19.4128	7.29e-07	0.000101414
CHANG_CYCLING_GENES	-0.0303386	0.297372	-19.17	7.88e-07	0.000106532
GRAHAM_NORMAL_QUIESCENT_VS_NORMAL_DIVIDING_DN	-0.0401311	0.268274	-19.0098	8.31e-07	0.000106873
HORTON_SREBF_TARGETS	0.0438251	0.305758	18.9895	8.36e-07	0.000106873
GAVIN_FOXP3_TARGETS_CLUSTER_P6	-0.0287174	0.23529	-18.7152	9.15e-07	0.000113903
TERAMOTO_OPN_TARGETS_CLUSTER_1	0.0348782	0.324675	18.6116	9.47e-07	0.000114875
BIOCARTA_RB_PATHWAY	-0.0556882	0.321301	-18.4985	9.84e-07	0.000116323
KAMMINGA_EZH2_TARGETS	-0.0321897	0.382891	-18.4208	1.01e-06	0.000116487
ROSTY_CERVICAL_CANCER_PROLIFERATION_CLUSTER	-0.0349093	0.319283	-18.1796	1.1e-06	0.000122189
SONG_TARGETS_OF_IE86_CMV_PROTEIN	-0.0382009	0.299769	-18.1397	1.11e-06	0.000122189
SABATES_COLORECTAL_ADENOMA_DN	0.0253326	-0.0906801	18.044	1.15e-06	0.000123394
REACTOME_G2_M_DNA_DAMAGE_CHECKPOINT	-0.0606304	0.285995	-17.82	1.24e-06	0.000129979
REACTOME_PROCESSIVE_SYNTHESIS_ON_THE_LAGGING_STRAND	-0.0392389	0.274143	-17.7466	1.27e-06	0.000129979
AMUNDSON_GAMMA_RADIATION_RESPONSE	-0.0342071	0.330363	-17.704	1.29e-06	0.000129979
CROMER_TUMORIGENESIS_DN	0.0399512	0.179531	17.6347	1.32e-06	0.000130404
MORI_IMMATURE_B_LYMPHOCYTE_DN	-0.0288796	0.351133	-17.5327	1.37e-06	0.000130865
REACTOME_G1_S_SPECIFIC_TRANSCRIPTION	-0.0369922	0.246302	-17.5089	1.38e-06	0.000130865
REACTOME_PECAM1_INTERACTIONS	-0.0332468	0.278243	-17.3658	1.46e-06	0.000131201
SA_G2_AND_M_PHASES	-0.0299687	0.25481	-17.3302	1.47e-06	0.000131201
VERNELL_RETINOBLASTOMA_PATHWAY_UP	-0.0313761	0.251852	-17.2793	1.5e-06	0.000131201
KANG_DOXORUBICIN_RESISTANCE_UP	-0.0438844	0.328175	-17.2212	1.53e-06	0.000131201
DUTERTRE_ESTRADIOL_RESPONSE_24HR_UP	-0.0333771	0.237441	-17.2104	1.54e-06	0.000131201
REACTOME_EXTENSION_OF_TELOMERES	-0.0379773	0.272995	-17.1843	1.55e-06	0.000131201
WHITEFORD_PEDIATRIC_CANCER_MARKERS	-0.0329073	0.320391	-17.1186	1.59e-06	0.000131889
KOBAYASHI_EGFR_SIGNALING_24HR_DN	-0.0276825	0.277568	-17.0728	1.62e-06	0.000131889
KANG_AR_TARGETS_UP	0.0447577	0.0324078	16.9864	1.67e-06	0.00013379
ZHOU_CELL_CYCLE_GENES_IN_IR_RESPONSE_24HR	-0.0306369	0.295025	-16.8545	1.75e-06	0.000138057
MISHRA_CARCINOMA_ASSOCIATED_FIBROBLAST_UP	0.0289171	0.024979	16.7311	1.83e-06	0.000140388
MISSIAGLIA_REGULATED_BY_METHYLATION_DN	-0.0286761	0.33877	-16.7201	1.84e-06	0.000140388
HOFFMANN_LARGE_TO_SMALL_PRE_BII_LYMPHOCYTE_UP	-0.0269497	0.323594	-16.5967	1.93e-06	0.000144638
SEMBA_FHIT_TARGETS_DN	-0.0358088	0.331845	-16.48	2.01e-06	0.000145981
AMIT_EGF_RESPONSE_40_MCF10A	0.028248	0.29257	16.3877	2.08e-06	0.000145981
PETROVA_PROX1_TARGETS_UP	-0.0262562	0.241646	-16.3788	2.09e-06	0.000145981
WINZEN_DEGRADED_VIA_KHSRP	0.0252882	0.123245	16.3706	2.1e-06	0.000145981
LIM_MAMMARY_LUMINAL_PROGENITOR_DN	0.0358614	0.224517	16.2981	2.16e-06	0.000145981
SOTIRIOU_BREAST_CANCER_GRADE_1_VS_3_UP	-0.0328098	0.323859	-16.2627	2.18e-06	0.000145981
HINATA_NFKB_TARGETS_KERATINOCYTE_DN	0.0554948	0.239807	16.2608	2.19e-06	0.000145981
REACTOME_INHIBITION_OF_REPLICATION_INITIATION_OF_DAMAGED_DNA_BY_RB1_E2F1	-0.0313064	0.289889	-16.2544	2.19e-06	0.000145981
REACTOME_RECRUITMENT_OF_NUMA_TO_MITOTIC_CENTROSOMES	-0.0289478	0.318138	-16.1706	2.26e-06	0.000148628
ZHAN_MULTIPLE_MYELOMA_PR_UP	-0.0379195	0.289599	-16.1267	2.3e-06	0.000149075
MOLENAAR_TARGETS_OF_CCND1_AND_CDK4_DN	-0.0375821	0.264337	-15.9812	2.43e-06	0.000155523
SARTIPY_NORMAL_AT_INSULIN_RESISTANCE_UP	0.0276992	0.20289	15.9278	2.48e-06	0.000156654
KUMAMOTO_RESPONSE_TO_NUTLIN_3A_DN	-0.0298269	0.374161	-15.8665	2.54e-06	0.000158312
PUJANA_BREAST_CANCER_WITH_BRCA1_MUTATED_UP	-0.0322547	0.34237	-15.7528	2.66e-06	0.000163351
FUJII_YBX1_TARGETS_DN	-0.0297526	0.278256	-15.5358	2.9e-06	0.000175661
WIEMANN_TELOMERE_SHORTENING_AND_CHRONIC_LIVER_DAMAGE_DN	0.0502251	0.132086	15.378	3.09e-06	0.000184703
KAAB_FAILED_HEART_ATRIUM_UP	0.0236752	0.29315	15.314	3.17e-06	0.000187138
GOBERT_OLIGODENDROCYTE_DIFFERENTIATION_UP	-0.0250928	0.262298	-15.2634	3.23e-06	0.000188635
FINETTI_BREAST_CANCER_KINOME_RED	-0.0506216	0.293339	-15.1704	3.36e-06	0.000192262
GRAHAM_CML_DIVIDING_VS_NORMAL_QUIESCENT_UP	-0.0276772	0.274291	-15.1562	3.37e-06	0.000192262
REACTOME_ENDOGENOUS_STEROLS	0.0557017	-0.0645111	15.1106	3.44e-06	0.000193061
REACTOME_REGULATION_OF_COMPLEMENT_CASCADE	0.0471654	0.0814322	15.0876	3.47e-06	0.000193061
WAKASUGI_HAVE_ZNF143_BINDING_SITES	-0.023539	0.229129	-14.9751	3.63e-06	0.000198685
CHEMNITZ_RESPONSE_TO_PROSTAGLANDIN_E2_UP	-0.021685	0.271649	-14.9607	3.66e-06	0.000198685
RICKMAN_HEAD_AND_NECK_CANCER_E	0.0262136	0.0364369	14.8967	3.75e-06	0.000201679
BOSCO_EPITHELIAL_DIFFERENTIATION_MODULE	0.0372608	0.130917	14.7924	3.92e-06	0.000208226
REACTOME_REPAIR_SYNTHESIS_FOR_GAP_FILLING_BY_DNA_POL_IN_TC_NER	-0.0404761	0.285299	-14.686	4.1e-06	0.000213943
INGRAM_SHH_TARGETS	0.0330353	0.247617	14.6743	4.12e-06	0.000213943
WINNEPENNINCKX_MELANOMA_METASTASIS_UP	-0.0223272	0.321187	-14.6114	4.23e-06	0.000216526
REACTOME_AMINE_DERIVED_HORMONES	0.0387144	-0.109491	14.5875	4.27e-06	0.000216526
KONG_E2F3_TARGETS	-0.0362202	0.294174	-14.5686	4.3e-06	0.000216526
MORI_LARGE_PRE_BII_LYMPHOCYTE_UP	-0.0267029	0.357383	-14.5165	4.4e-06	0.00021902
FERRANDO_HOX11_NEIGHBORS	-0.0368607	0.28695	-14.3277	4.77e-06	0.000234892
KAUFFMANN_DNA_REPLICATION_GENES	-0.02203	0.290974	-14.2077	5.02e-06	0.000244789
LY_AGING_OLD_DN	-0.023584	0.361794	-14.098	5.27e-06	0.000250713
ZHANG_TLX_TARGETS_60HR_DN	-0.0262404	0.298354	-14.0924	5.28e-06	0.000250713
SMID_BREAST_CANCER_LUMINAL_A_DN	-0.0250309	0.340131	-14.0824	5.3e-06	0.000250713
LY_AGING_MIDDLE_DN	-0.0318438	0.370905	-14.0481	5.38e-06	0.000250785
MIZUKAMI_HYPOXIA_DN	0.0440596	0.187478	14.0364	5.41e-06	0.000250785
EGUCHI_CELL_CYCLE_RB1_TARGETS	-0.0410822	0.35588	-13.9836	5.54e-06	0.00025221
WATTEL_AUTONOMOUS_THYROID_ADENOMA_DN	0.0270337	0.0823915	13.9789	5.55e-06	0.00025221
JEON_SMAD6_TARGETS_UP	0.0307091	0.167873	13.9471	5.63e-06	0.00025221
MARKEY_RB1_ACUTE_LOF_UP	-0.0203171	0.318498	-13.9357	5.65e-06	0.00025221
REN_MIF_TARGETS_DN	0.0293047	0.0365583	13.9075	5.72e-06	0.000252243
LE_NEURONAL_DIFFERENTIATION_DN	-0.0284342	0.292141	-13.8714	5.82e-06	0.000252243
PID_S1P_META_PATHWAY	0.0273258	0.243919	13.865	5.83e-06	0.000252243
RICKMAN_TUMOR_DIFFERENTIATED_WELL_VS_POORLY_DN	0.0195853	0.222574	13.8515	5.87e-06	0.000252243
KEGG_ASCORBATE_AND_ALDARATE_METABOLISM	-0.0436837	-0.00233022	-13.7505	6.14e-06	0.000261057
PUJANA_BRCA_CENTERED_NETWORK	-0.0282651	0.355366	-13.7337	6.18e-06	0.000261057
MONTERO_THYROID_CANCER_POOR_SURVIVAL_UP	-0.0274906	0.320729	-13.7096	6.25e-06	0.000261548
REACTOME_CDC6_ASSOCIATION_WITH_THE_ORC_ORIGIN_COMPLEX	-0.0257925	0.216982	-13.6051	6.55e-06	0.000271696
NADERI_BREAST_CANCER_PROGNOSIS_UP	-0.0219588	0.253281	-13.5755	6.64e-06	0.000272727
FRASOR_RESPONSE_TO_SERM_OR_FULVESTRANT_DN	-0.032112	0.315675	-13.5341	6.76e-06	0.000272727
FOURNIER_ACINAR_DEVELOPMENT_LATE_DN	-0.0208472	0.301945	-13.5147	6.82e-06	0.000272727
REACTOME_CYTOSOLIC_SULFONATION_OF_SMALL_MOLECULES	0.0326105	0.114145	13.5015	6.86e-06	0.000272727
TSUNODA_CISPLATIN_RESISTANCE_UP	0.053583	0.0819799	13.4819	6.92e-06	0.000272727
LI_WILMS_TUMOR_ANAPLASTIC_UP	-0.0311108	0.35533	-13.4678	6.97e-06	0.000272727
AMIT_SERUM_RESPONSE_240_MCF10A	0.0271405	0.259924	13.4649	6.98e-06	0.000272727
PEDERSEN_METASTASIS_BY_ERBB2_ISOFORM_4	0.0255135	0.196997	13.4469	7.04e-06	0.000272727
MATZUK_STEROIDOGENESIS	0.0381986	0.147637	13.3218	7.45e-06	0.000286431
PLASARI_TGFB1_SIGNALING_VIA_NFIC_10HR_DN	0.0237536	0.122802	13.2357	7.75e-06	0.000295611
BIOCARTA_MCM_PATHWAY	-0.030886	0.30721	-13.1797	7.95e-06	0.00030014
AIGNER_ZEB1_TARGETS	0.0190399	0.321143	13.1571	8.04e-06	0.00030014
PEART_HDAC_PROLIFERATION_CLUSTER_DN	-0.0194752	0.298507	-13.1118	8.21e-06	0.00030014
DAUER_STAT3_TARGETS_UP	0.0291925	0.194104	13.1064	8.23e-06	0.00030014
CEBALLOS_TARGETS_OF_TP53_AND_MYC_UP	0.0218472	0.262968	13.1044	8.24e-06	0.00030014
PID_ATR_PATHWAY	-0.0286215	0.27278	-13.1011	8.25e-06	0.00030014
KEGG_GLYCOSAMINOGLYCAN_BIOSYNTHESIS_HEPARAN_SULFATE	-0.0202701	0.123841	-13.065	8.39e-06	0.000302918
KALMA_E2F1_TARGETS	-0.0432992	0.342869	-12.9756	8.75e-06	0.000313507
HORIUCHI_WTAP_TARGETS_DN	-0.0194774	0.313745	-12.9473	8.87e-06	0.000314549
NIELSEN_SYNOVIAL_SARCOMA_UP	0.0377401	0.186576	12.9366	8.91e-06	0.000314549
XU_HGF_TARGETS_INDUCED_BY_AKT1_6HR	0.027621	0.261785	12.8721	9.19e-06	0.000321895
CHIANG_LIVER_CANCER_SUBCLASS_PROLIFERATION_UP	-0.0228447	0.298859	-12.8059	9.48e-06	0.000329734
KUWANO_RNA_STABILIZED_BY_NO	0.0256599	0.104966	12.7459	9.76e-06	0.000336585
AMIT_EGF_RESPONSE_40_HELA	0.0187868	0.281437	12.7323	9.82e-06	0.000336585
BENPORATH_PROLIFERATION	-0.0208267	0.328962	-12.7024	9.96e-06	0.000337071
GALI_TP53_TARGETS_APOPTOTIC_DN	-0.0254896	0.203376	-12.6963	9.99e-06	0.000337071
FURUKAWA_DUSP6_TARGETS_PCI35_DN	-0.0210252	0.266503	-12.6845	1.01e-05	0.000337071
JAEGER_METASTASIS_DN	0.0196602	0.199098	12.6207	1.04e-05	0.000341623
GREENBAUM_E2A_TARGETS_UP	-0.0240547	0.353229	-12.6137	1.04e-05	0.000341623
COURTOIS_SENESCENCE_TRIGGERS	0.0225685	0.335603	12.613	1.04e-05	0.000341623
MORI_EMU_MYC_LYMPHOMA_BY_ONSET_TIME_UP	-0.017547	0.277961	-12.5777	1.06e-05	0.000345122
SARRIO_EPITHELIAL_MESENCHYMAL_TRANSITION_UP	-0.0203735	0.267367	-12.5469	1.07e-05	0.000347915
AMIT_SERUM_RESPONSE_60_MCF10A	0.0258969	0.204985	12.4767	1.11e-05	0.000357562
KEGG_HOMOLOGOUS_RECOMBINATION	-0.0299145	0.213387	-12.3973	1.16e-05	0.000368947
KAUFFMANN_DNA_REPAIR_GENES	-0.0189788	0.248127	-12.3851	1.16e-05	0.000368947
LY_AGING_PREMATURE_DN	-0.0247192	0.313094	-12.3491	1.18e-05	0.000372063
REACTOME_UNWINDING_OF_DNA	-0.042125	0.306986	-12.341	1.19e-05	0.000372063
MYLLYKANGAS_AMPLIFICATION_HOT_SPOT_6	-0.0445068	0.220687	-12.1557	1.3e-05	0.000402653
AMIT_EGF_RESPONSE_240_MCF10A	0.0346014	0.202981	12.1327	1.32e-05	0.000402653
NAGASHIMA_NRG1_SIGNALING_UP	0.0175384	0.246303	12.1302	1.32e-05	0.000402653
BURTON_ADIPOGENESIS_PEAK_AT_24HR	-0.0317017	0.337223	-12.1295	1.32e-05	0.000402653
CHANG_IMMORTALIZED_BY_HPV31_DN	0.0247436	0.158049	12.0916	1.35e-05	0.000407749
ONDER_CDH1_TARGETS_3_UP	0.032902	0.262904	12.0238	1.39e-05	0.000417514
PID_S1P_S1P2_PATHWAY	0.0235619	0.322421	12.0194	1.39e-05	0.000417514
REACTOME_CELL_CYCLE_MITOTIC	-0.0176201	0.301871	-11.8899	1.49e-05	0.000440541
REACTOME_METABOLISM_OF_NON_CODING_RNA	-0.0199736	0.307493	-11.8889	1.49e-05	0.000440541
PUJANA_XPRSS_INT_NETWORK	-0.0287656	0.348693	-11.8627	1.51e-05	0.000443706
RUIZ_TNC_TARGETS_DN	-0.0212779	0.265658	-11.7683	1.59e-05	0.000462882
BAUS_TFF2_TARGETS_DN	-0.030993	0.27665	-11.7383	1.61e-05	0.000463368
RICKMAN_HEAD_AND_NECK_CANCER_C	0.0273307	0.0220644	11.7344	1.61e-05	0.000463368
COLDREN_GEFITINIB_RESISTANCE_DN	0.0178664	0.29134	11.7307	1.62e-05	0.000463368
LIU_TOPBP1_TARGETS	-0.0197632	0.182127	-11.7176	1.63e-05	0.000463705
NAGASHIMA_EGF_SIGNALING_UP	0.0233945	0.21276	11.7045	1.64e-05	0.000464054
OHASHI_AURKB_TARGETS	-0.035083	0.203068	-11.6852	1.66e-05	0.000465946
KOMMAGANI_TP63_GAMMA_TARGETS	0.0209261	0.19613	11.626	1.71e-05	0.000475616
LE_EGR2_TARGETS_UP	-0.0243021	0.310751	-11.6169	1.72e-05	0.000475616
CHUANG_OXIDATIVE_STRESS_RESPONSE_DN	-0.01785	0.307482	-11.6117	1.72e-05	0.000475616
BURTON_ADIPOGENESIS_PEAK_AT_16HR	-0.0333666	0.306133	-11.5183	1.81e-05	0.000496542
MARSON_BOUND_BY_E2F4_UNSTIMULATED	-0.016821	0.241741	-11.5025	1.82e-05	0.000497812
WOOD_EBV_EBNA1_TARGETS_DN	0.0203985	0.289656	11.4701	1.85e-05	0.000502614
REACTOME_DNA_REPLICATION	-0.019247	0.306589	-11.4585	1.86e-05	0.000502614
REACTOME_CELL_CYCLE	-0.0163482	0.270867	-11.4517	1.87e-05	0.000502614
LI_WILMS_TUMOR_VS_FETAL_KIDNEY_1_DN	-0.0207531	0.332706	-11.3497	1.97e-05	0.000526648
BLUM_RESPONSE_TO_SALIRASIB_DN	-0.0175873	0.303658	-11.3292	2e-05	0.000526648
PUJANA_BRCA2_PCC_NETWORK	-0.0209242	0.307316	-11.3234	2e-05	0.000526648
FARMER_BREAST_CANCER_CLUSTER_2	-0.0285267	0.335834	-11.3215	2e-05	0.000526648
REACTOME_TRANSPORT_OF_MATURE_TRANSCRIPT_TO_CYTOPLASM	-0.0191575	0.378979	-11.2893	2.04e-05	0.000531185
ONDER_CDH1_TARGETS_3_DN	0.0223187	0.149069	11.2848	2.04e-05	0.000531185
REACTOME_PURINE_RIBONUCLEOSIDE_MONOPHOSPHATE_BIOSYNTHESIS	-0.0159475	0.369528	-11.2175	2.12e-05	0.000545006
PID_ENDOTHELIN_PATHWAY	0.0165849	0.241933	11.2147	2.12e-05	0.000545006
IKEDA_MIR1_TARGETS_DN	0.0305346	0.341051	11.2066	2.13e-05	0.000545006
BIOCARTA_G2_PATHWAY	-0.0268157	0.316177	-11.185	2.16e-05	0.000545433
SABATES_COLORECTAL_ADENOMA_SIZE_UP	-0.0174577	0.248003	-11.1716	2.17e-05	0.000545433
CHEN_ETV5_TARGETS_TESTIS	-0.0440037	0.242999	-11.1666	2.18e-05	0.000545433
MCCLUNG_DELTA_FOSB_TARGETS_2WK	0.0168657	0.124613	11.1655	2.18e-05	0.000545433
ZIRN_TRETINOIN_RESPONSE_WT1_UP	0.0210931	0.211646	11.1528	2.19e-05	0.0005463
REACTOME_G0_AND_EARLY_G1	-0.0207064	0.259677	-11.0828	2.28e-05	0.000564488
SMID_BREAST_CANCER_NORMAL_LIKE_DN	0.0290182	0.408053	11.054	2.32e-05	0.000570458
MANTOVANI_NFKB_TARGETS_UP	0.0265136	0.119179	11.0024	2.38e-05	0.000580217
CHEOK_RESPONSE_TO_MERCAPTOPURINE_UP	-0.0210897	0.229424	-10.9888	2.4e-05	0.000580217
WILLIAMS_ESR2_TARGETS_UP	0.0198863	0.260136	10.9883	2.4e-05	0.000580217
GRAHAM_NORMAL_QUIESCENT_VS_NORMAL_DIVIDING_UP	0.0259174	0.170512	10.9853	2.4e-05	0.000580217
TIAN_TNF_SIGNALING_NOT_VIA_NFKB	0.024874	0.237827	10.9486	2.45e-05	0.000585612
REACTOME_ACYL_CHAIN_REMODELLING_OF_PS	0.0219141	0.1422	10.9486	2.45e-05	0.000585612
AUJLA_IL22_AND_IL17A_SIGNALING	0.0405092	-0.20161	10.9324	2.48e-05	0.000585612
SHEDDEN_LUNG_CANCER_POOR_SURVIVAL_A6	-0.0171703	0.297662	-10.9244	2.49e-05	0.000585612
YAMASHITA_LIVER_CANCER_STEM_CELL_DN	0.0166471	0.0868066	10.9228	2.49e-05	0.000585612
SLEBOS_HEAD_AND_NECK_CANCER_WITH_HPV_UP	-0.0164895	0.183957	-10.8894	2.54e-05	0.000593545
REACTOME_INHIBITION_OF_THE_PROTEOLYTIC_ACTIVITY_OF_APC_C_REQUIRED_FOR_THE_ONSET_OF_ANAPHASE_BY_MITOTIC_SPINDLE_CHECKPOINT_COMPONENTS	-0.0226107	0.302891	-10.8708	2.56e-05	0.000596759
REACTOME_HS_GAG_BIOSYNTHESIS	-0.0251141	0.195316	-10.8476	2.59e-05	0.000601498
REACTOME_HEPARAN_SULFATE_HEPARIN_HS_GAG_METABOLISM	-0.0222114	0.191263	-10.7996	2.67e-05	0.0006148
REACTOME_CHOLESTEROL_BIOSYNTHESIS	0.0339551	0.297789	10.7528	2.74e-05	0.00062775
GUTIERREZ_WALDENSTROEMS_MACROGLOBULINEMIA_1_DN	0.0503621	-0.0422814	10.7449	2.75e-05	0.00062775
PHONG_TNF_TARGETS_UP	0.0166159	0.177509	10.721	2.78e-05	0.0006306
FEVR_CTNNB1_TARGETS_DN	-0.0168845	0.310438	-10.7083	2.8e-05	0.0006306
ZEMBUTSU_SENSITIVITY_TO_METHOTREXATE	-0.0165509	0.194437	-10.708	2.81e-05	0.0006306
SCHOEN_NFKB_SIGNALING	0.0241444	0.0180807	10.7027	2.81e-05	0.0006306
MAINA_VHL_TARGETS_UP	0.0196787	0.21071	10.667	2.87e-05	0.000637591
KEGG_PENTOSE_AND_GLUCURONATE_INTERCONVERSIONS	-0.0303559	-0.0118657	-10.6664	2.87e-05	0.000637591
REACTOME_DNA_REPAIR	-0.0198681	0.262387	-10.6507	2.9e-05	0.000638403
REACTOME_ACYL_CHAIN_REMODELLING_OF_PG	0.0258175	0.163794	10.6476	2.9e-05	0.000638403
PUJANA_BREAST_CANCER_LIT_INT_NETWORK	-0.0169181	0.325726	-10.6099	2.97e-05	0.000646702
HAHTOLA_MYCOSIS_FUNGOIDES_CD4_UP	0.0169953	0.209832	10.6069	2.97e-05	0.000646702
GARGALOVIC_RESPONSE_TO_OXIDIZED_PHOSPHOLIPIDS_TURQUOISE_DN	-0.0201794	0.235709	-10.6003	2.98e-05	0.000646702
MIKKELSEN_MCV6_LCP_WITH_H3K27ME3	0.033289	-0.116701	10.591	3e-05	0.000647153
PID_FOXM1_PATHWAY	-0.0213798	0.319951	-10.5673	3.04e-05	0.000650455
SENESE_HDAC1_AND_HDAC2_TARGETS_DN	0.0145944	0.129498	10.5456	3.08e-05	0.000650455
PETRETTO_BLOOD_PRESSURE_DN	-0.0227549	0.324849	-10.537	3.09e-05	0.000650455
ABBUD_LIF_SIGNALING_2_DN	0.0343581	0.136208	10.5336	3.1e-05	0.000650455
YU_MYC_TARGETS_UP	-0.0210414	0.350479	-10.5151	3.13e-05	0.000650455
BENPORATH_ES_2	-0.0221416	0.149345	-10.5147	3.13e-05	0.000650455
SCHAEFFER_SOX9_TARGETS_IN_PROSTATE_DEVELOPMENT_UP	0.0194055	0.310194	10.5086	3.14e-05	0.000650455
LOPEZ_MESOTELIOMA_SURVIVAL_TIME_DN	-0.027325	0.108829	-10.5032	3.15e-05	0.000650455
KANG_IMMORTALIZED_BY_TERT_UP	0.0176291	0.159454	10.498	3.16e-05	0.000650455
KEGG_LIMONENE_AND_PINENE_DEGRADATION	-0.0234223	0.299196	-10.4916	3.17e-05	0.000650455
WU_APOPTOSIS_BY_CDKN1A_VIA_TP53	-0.0272739	0.323526	-10.49	3.17e-05	0.000650455
DELPUECH_FOXO3_TARGETS_UP	0.0164193	0.28777	10.4885	3.18e-05	0.000650455
BOYAULT_LIVER_CANCER_SUBCLASS_G23_UP	-0.0192057	0.312171	-10.4759	3.2e-05	0.000652356
AMIT_EGF_RESPONSE_240_HELA	0.0177397	0.311457	10.466	3.22e-05	0.000653228
FERREIRA_EWINGS_SARCOMA_UNSTABLE_VS_STABLE_UP	-0.0203463	0.283243	-10.4478	3.25e-05	0.000656555
TAKEDA_TARGETS_OF_NUP98_HOXA9_FUSION_10D_DN	0.0160919	0.0865056	10.4423	3.26e-05	0.000656555
LINDVALL_IMMORTALIZED_BY_TERT_UP	0.0151585	0.247438	10.4321	3.28e-05	0.000657639
KEGG_CELL_CYCLE	-0.016415	0.303248	-10.4208	3.3e-05	0.000659127
DALESSIO_TSA_RESPONSE	0.0364443	0.120887	10.3993	3.34e-05	0.000662818
YORDY_RECIPROCAL_REGULATION_BY_ETS1_AND_SP100_DN	0.0171892	0.151499	10.3943	3.35e-05	0.000662818
ZHU_SKIL_TARGETS_DN	0.0237619	0.214729	10.3893	3.36e-05	0.000662818
GROSS_HYPOXIA_VIA_ELK3_ONLY_UP	0.0277686	0.2331	10.3785	3.38e-05	0.000664188
ZHANG_GATA6_TARGETS_UP	0.0310184	0.211323	10.3636	3.41e-05	0.000667166
TAGHAVI_NEOPLASTIC_TRANSFORMATION	0.0172048	0.267102	10.3449	3.45e-05	0.000671685
TONKS_TARGETS_OF_RUNX1_RUNX1T1_FUSION_GRANULOCYTE_DN	0.0248099	-0.0340388	10.3169	3.51e-05	0.000677726
MURATA_VIRULENCE_OF_H_PILORI	0.0190265	0.143908	10.3153	3.51e-05	0.000677726
REACTOME_CYCLIN_A_B1_ASSOCIATED_EVENTS_DURING_G2_M_TRANSITION	-0.0295012	0.324951	-10.2948	3.55e-05	0.00067861
ZHENG_GLIOBLASTOMA_PLASTICITY_UP	-0.0145949	0.219841	-10.2928	3.56e-05	0.00067861
IM_SREBF1A_TARGETS	-0.0313498	0.157736	-10.2885	3.57e-05	0.00067861
PID_FANCONI_PATHWAY	-0.035505	0.225883	-10.2766	3.59e-05	0.00067861
LEE_LIVER_CANCER_HEPATOBLAST	0.0261446	0.202213	10.2761	3.59e-05	0.00067861
SUZUKI_RESPONSE_TO_TSA_AND_DECITABINE_1A	0.0340494	0.0659244	10.2715	3.6e-05	0.00067861
TAKEDA_TARGETS_OF_NUP98_HOXA9_FUSION_10D_UP	0.0183863	0.0885966	10.2485	3.65e-05	0.000685061
RICKMAN_HEAD_AND_NECK_CANCER_D	0.019357	0.0302328	10.2391	3.67e-05	0.000686119
MEINHOLD_OVARIAN_CANCER_LOW_GRADE_UP	0.0195391	0.297319	10.221	3.71e-05	0.000689796
GEORGANTAS_HSC_MARKERS	0.0207974	0.17463	10.208	3.74e-05	0.000689796
ODONNELL_TARGETS_OF_MYC_AND_TFRC_DN	-0.0271152	0.313483	-10.1991	3.76e-05	0.000689796
BIOCARTA_BARR_MAPK_PATHWAY	0.0183213	0.356933	10.1983	3.76e-05	0.000689796
LIU_CDX2_TARGETS_UP	0.0200028	0.0915973	10.1966	3.76e-05	0.000689796
DORSEY_GAB2_TARGETS	0.0322073	0.0827576	10.17	3.82e-05	0.000697987
NAISHIRO_CTNNB1_TARGETS_WITH_LEF1_MOTIF	0.0361941	0.234717	10.1378	3.9e-05	0.000708637
THILLAINADESAN_ZNF217_TARGETS_DN	0.0433566	0.176874	10.1129	3.95e-05	0.000713743
REACTOME_MITOTIC_M_M_G1_PHASES	-0.0169853	0.311071	-10.1127	3.95e-05	0.000713743
RODRIGUES_NTN1_AND_DCC_TARGETS	0.0184024	0.245253	10.1017	3.98e-05	0.00071565
BASSO_HAIRY_CELL_LEUKEMIA_UP	0.0149966	0.208529	10.0469	4.11e-05	0.000736515
VALK_AML_CLUSTER_13	0.0202382	0.122824	10.0334	4.15e-05	0.000739698
LIN_SILENCED_BY_TUMOR_MICROENVIRONMENT	0.0285146	0.19498	10.0197	4.18e-05	0.000741946
AMIT_SERUM_RESPONSE_40_MCF10A	0.0201148	0.20476	10.0103	4.2e-05	0.000741946
HOLLEMAN_VINCRISTINE_RESISTANCE_B_ALL_UP	0.0171942	0.227056	10.0094	4.2e-05	0.000741946
SCIAN_CELL_CYCLE_TARGETS_OF_TP53_AND_TP73_DN	-0.0298998	0.351811	-9.94846	4.36e-05	0.000766664
MANN_RESPONSE_TO_AMIFOSTINE_DN	-0.0145002	0.361732	-9.90845	4.47e-05	0.000782434
BIOCARTA_STRESS_PATHWAY	-0.0160089	0.268547	-9.88358	4.53e-05	0.000783203
REACTOME_TRANSPORT_TO_THE_GOLGI_AND_SUBSEQUENT_MODIFICATION	0.0195873	0.264301	9.87939	4.55e-05	0.000783203
REACTOME_NUCLEAR_RECEPTOR_TRANSCRIPTION_PATHWAY	0.0192297	0.168119	9.87828	4.55e-05	0.000783203
TONKS_TARGETS_OF_RUNX1_RUNX1T1_FUSION_SUSTAINED_IN_MONOCYTE_DN	0.0295665	-0.044383	9.87478	4.56e-05	0.000783203
MAHAJAN_RESPONSE_TO_IL1A_UP	0.0165278	0.137595	9.87199	4.57e-05	0.000783203
PUJANA_BREAST_CANCER_WITH_BRCA1_MUTATED_DN	-0.0215655	0.33894	-9.86252	4.59e-05	0.000783203
MYLLYKANGAS_AMPLIFICATION_HOT_SPOT_5	-0.0144557	0.316465	-9.85745	4.61e-05	0.000783203
ZHANG_ADIPOGENESIS_BY_BMP7	0.0175195	0.363084	9.85489	4.61e-05	0.000783203
BIOCARTA_INTRINSIC_PATHWAY	-0.0150962	-0.0508963	-9.85239	4.62e-05	0.000783203
REACTOME_MITOTIC_PROMETAPHASE	-0.0193258	0.295581	-9.84396	4.64e-05	0.000783203
SENGUPTA_NASOPHARYNGEAL_CARCINOMA_WITH_LMP1_DN	0.0184399	0.0107247	9.84077	4.65e-05	0.000783203
LOPEZ_EPITHELIOID_MESOTHELIOMA	0.0442844	0.298237	9.70852	5.04e-05	0.000843029
LOPEZ_MESOTELIOMA_SURVIVAL_TIME_UP	-0.0314507	0.286342	-9.7085	5.04e-05	0.000843029
LEE_EARLY_T_LYMPHOCYTE_UP	-0.0269346	0.237993	-9.68511	5.12e-05	0.000847162
MIKKELSEN_PARTIALLY_REPROGRAMMED_TO_PLURIPOTENCY	0.0317268	0.267261	9.68385	5.12e-05	0.000847162
WIEMANN_TELOMERE_SHORTENING_AND_CHRONIC_LIVER_DAMAGE_UP	0.0268435	0.273222	9.68338	5.12e-05	0.000847162
AMIT_EGF_RESPONSE_120_HELA	0.0169103	0.239463	9.66942	5.17e-05	0.000849407
REACTOME_APC_CDC20_MEDIATED_DEGRADATION_OF_NEK2A	-0.0225802	0.319101	-9.66776	5.17e-05	0.000849407
SHEPARD_BMYB_TARGETS	-0.0232923	0.28026	-9.64328	5.25e-05	0.000859344
NAKAYAMA_SOFT_TISSUE_TUMORS_PCA2_UP	-0.0196033	0.236564	-9.63736	5.27e-05	0.000859521
MILICIC_FAMILIAL_ADENOMATOUS_POLYPOSIS_UP	0.023094	0.177411	9.622	5.32e-05	0.000864737
PIEPOLI_LGI1_TARGETS_DN	0.0318452	0.135072	9.61503	5.34e-05	0.000865502
BURTON_ADIPOGENESIS_10	0.0145631	0.30291	9.60726	5.37e-05	0.0008663
TSUDA_ALVEOLAR_SOFT_PART_SARCOMA	0.0262878	0.286017	9.60252	5.39e-05	0.0008663
SENESE_HDAC2_TARGETS_DN	0.0156729	0.0872043	9.5778	5.47e-05	0.00087671
SMIRNOV_CIRCULATING_ENDOTHELIOCYTES_IN_CANCER_UP	0.0174685	0.155207	9.54467	5.58e-05	0.000891948
MANALO_HYPOXIA_DN	-0.0188589	0.284711	-9.52281	5.66e-05	0.00089829
INAMURA_LUNG_CANCER_SCC_DN	0.0313677	-0.0396699	9.52251	5.66e-05	0.00089829
HAN_JNK_SINGALING_UP	0.0203341	0.164801	9.47299	5.84e-05	0.000922591
SABATES_COLORECTAL_ADENOMA_SIZE_DN	0.0185431	0.111229	9.46919	5.85e-05	0.000922591
LEE_DOUBLE_POLAR_THYMOCYTE	0.0283177	0.119278	9.45291	5.91e-05	0.000928971
TOMLINS_METASTASIS_DN	0.014941	0.281231	9.43659	5.97e-05	0.00093545
LE_EGR2_TARGETS_DN	0.0138366	0.230195	9.41376	6.06e-05	0.000945872
YAO_TEMPORAL_RESPONSE_TO_PROGESTERONE_CLUSTER_6	0.0183421	0.223826	9.38509	6.17e-05	0.000959991
REACTOME_SYNTHESIS_OF_PA	0.0179148	0.178905	9.37347	6.22e-05	0.000961799
BIOCARTA_BARRESTIN_PATHWAY	0.0245831	0.361877	9.37176	6.22e-05	0.000961799
PID_BARD1_PATHWAY	-0.0307996	0.317278	-9.35821	6.28e-05	0.000966931
KEGG_TERPENOID_BACKBONE_BIOSYNTHESIS	0.0346583	0.231168	9.34155	6.34e-05	0.000974036
KEGG_PANTOTHENATE_AND_COA_BIOSYNTHESIS	0.0182976	0.181943	9.33354	6.38e-05	0.000975834
PLASARI_TGFB1_SIGNALING_VIA_NFIC_1HR_UP	0.0266306	0.0113362	9.32426	6.41e-05	0.000976861
ZIRN_TRETINOIN_RESPONSE_UP	0.0184838	0.219106	9.32174	6.42e-05	0.000976861
RORIE_TARGETS_OF_EWSR1_FLI1_FUSION_DN	0.0157499	-0.0563936	9.30727	6.48e-05	0.000982743
CHIARETTI_T_ALL_RELAPSE_PROGNOSIS	-0.0252656	0.316843	-9.29069	6.55e-05	0.000990015
KEGG_GLYCOSPHINGOLIPID_BIOSYNTHESIS_LACTO_AND_NEOLACTO_SERIES	0.0166137	0.145976	9.282	6.59e-05	0.000992353
PEDERSEN_METASTASIS_BY_ERBB2_ISOFORM_3	0.0243867	0.264508	9.26731	6.65e-05	0.000998537
PID_THROMBIN_PAR4_PATHWAY	0.0358844	0.201931	9.25723	6.69e-05	0.000998745
BIOCARTA_RNA_PATHWAY	-0.0260505	0.320123	-9.25709	6.69e-05	0.000998745
WOTTON_RUNX_TARGETS_UP	0.0216153	0.209172	9.24333	6.75e-05	0.00100437
REACTOME_INTERACTIONS_OF_VPR_WITH_HOST_CELLULAR_PROTEINS	-0.0191734	0.36643	-9.23851	6.78e-05	0.00100437
CAFFAREL_RESPONSE_TO_THC_8HR_3_UP	0.0161877	0.328619	9.22495	6.83e-05	0.00100998
MATHEW_FANCONI_ANEMIA_GENES	-0.0480013	0.143978	-9.21975	6.86e-05	0.0010102
NEBEN_AML_WITH_FLT3_OR_NRAS_DN	-0.0194688	0.33094	-9.2085	6.91e-05	0.00101438
WHITFIELD_CELL_CYCLE_G1_S	-0.0173431	0.245705	-9.19231	6.98e-05	0.00101937
HUMMERICH_BENIGN_SKIN_TUMOR_UP	0.0298161	0.143487	9.19125	6.98e-05	0.00101937
SABATES_COLORECTAL_ADENOMA_UP	0.0142495	0.131514	9.18375	7.02e-05	0.00102116
MORI_PRE_BI_LYMPHOCYTE_UP	-0.0190037	0.31828	-9.17349	7.06e-05	0.00102479
MURAKAMI_UV_RESPONSE_1HR_DN	0.0335784	0.205837	9.15336	7.16e-05	0.00103218
SU_SALIVARY_GLAND	0.0362439	0.143053	9.15289	7.16e-05	0.00103218
DORN_ADENOVIRUS_INFECTION_12HR_UP	0.0287298	0.26341	9.12213	7.3e-05	0.00104831
SHEPARD_BMYB_MORPHOLINO_DN	-0.0149332	0.215761	-9.11956	7.32e-05	0.00104831
REACTOME_PHOSPHORYLATION_OF_THE_APC_C	-0.0205841	0.300328	-9.10449	7.39e-05	0.00105257
BIOCARTA_FIBRINOLYSIS_PATHWAY	-0.0430204	-0.0780567	-9.1018	7.4e-05	0.00105257
BIOCARTA_SRCRPTP_PATHWAY	-0.0178389	0.372179	-9.09938	7.41e-05	0.00105257
NAKAMURA_ADIPOGENESIS_EARLY_UP	0.0161016	0.190269	9.0928	7.44e-05	0.00105392
HOFFMAN_CLOCK_TARGETS_UP	0.0303572	0.0628194	9.08055	7.5e-05	0.00105553
RAY_ALZHEIMERS_DISEASE	0.0457694	-0.0190686	9.08001	7.51e-05	0.00105553
PID_S1P_S1P3_PATHWAY	0.0226065	0.273441	9.07493	7.53e-05	0.00105553
TAKEDA_TARGETS_OF_NUP98_HOXA9_FUSION_16D_UP	0.0162471	0.109656	9.07216	7.54e-05	0.00105553
KEGG_ONE_CARBON_POOL_BY_FOLATE	-0.0220026	0.231722	-9.06113	7.6e-05	0.00105872
BIOCARTA_PTC1_PATHWAY	-0.017404	0.309737	-9.05849	7.61e-05	0.00105872
ABDULRAHMAN_KIDNEY_CANCER_VHL_DN	0.0249288	0.219795	9.04275	7.69e-05	0.00106652
PID_IL8_CXCR1_PATHWAY	0.0203916	0.252654	9.03781	7.72e-05	0.00106684
REACTOME_COPI_MEDIATED_TRANSPORT	0.0167069	0.465562	9.02902	7.76e-05	0.00106987
DACOSTA_LOW_DOSE_UV_RESPONSE_VIA_ERCC3_XPCS_DN	0.0167903	0.248743	9.02319	7.79e-05	0.00107083
KEGG_P53_SIGNALING_PATHWAY	-0.0134319	0.241322	-8.99776	7.92e-05	0.00108568
NELSON_RESPONSE_TO_ANDROGEN_UP	0.0178469	0.29813	8.98901	7.97e-05	0.00108878
REACTOME_FANCONI_ANEMIA_PATHWAY	-0.0386257	0.209218	-8.94763	8.19e-05	0.00111021
ABE_VEGFA_TARGETS_2HR	0.0204567	0.232941	8.94721	8.19e-05	0.00111021
PID_RXR_VDR_PATHWAY	0.0211998	0.260106	8.94629	8.19e-05	0.00111021
BARRIER_COLON_CANCER_RECURRENCE_UP	0.0162383	0.305958	8.92979	8.28e-05	0.0011168
WEST_ADRENOCORTICAL_TUMOR_MARKERS_DN	0.0300156	-0.0979874	8.9285	8.29e-05	0.0011168
NUYTTEN_EZH2_TARGETS_DN	-0.0128311	0.265962	-8.92436	8.31e-05	0.0011168
KERLEY_RESPONSE_TO_CISPLATIN_DN	0.0302485	0.143978	8.90994	8.39e-05	0.00112431
VANASSE_BCL2_TARGETS_UP	0.0230542	0.1428	8.87156	8.61e-05	0.00115004
ZHONG_RESPONSE_TO_AZACITIDINE_AND_TSA_DN	-0.012459	0.311082	-8.86173	8.67e-05	0.00115432
ZHANG_TLX_TARGETS_DN	-0.0374334	0.289481	-8.8544	8.71e-05	0.00115447
LOPEZ_MESOTHELIOMA_SURVIVAL_WORST_VS_BEST_UP	-0.0266513	0.302524	-8.84956	8.74e-05	0.00115447
TANG_SENESCENCE_TP53_TARGETS_DN	-0.0275124	0.286064	-8.84889	8.74e-05	0.00115447
REACTOME_METABOLISM_OF_STEROID_HORMONES_AND_VITAMINS_A_AND_D	0.0219792	-0.0176321	8.83935	8.8e-05	0.00115577
SWEET_KRAS_TARGETS_UP	0.0177939	0.185803	8.83883	8.8e-05	0.00115577
CALVET_IRINOTECAN_SENSITIVE_VS_RESISTANT_UP	-0.0414684	0.317798	-8.82541	8.88e-05	0.00116085
REACTOME_IONOTROPIC_ACTIVITY_OF_KAINATE_RECEPTORS	0.0273849	0.234703	8.82396	8.89e-05	0.00116085
PASTURAL_RIZ1_TARGETS_DN	-0.0484673	-0.0752423	-8.81623	8.93e-05	0.00116365
MYLLYKANGAS_AMPLIFICATION_HOT_SPOT_14	-0.0287767	0.387124	-8.74935	9.34e-05	0.00121366
MYLLYKANGAS_AMPLIFICATION_HOT_SPOT_30	0.0181719	0.35099	8.73741	9.42e-05	0.0012201
COLDREN_GEFITINIB_RESISTANCE_UP	-0.0128449	0.219993	-8.72409	9.5e-05	0.00122773
ZHANG_GATA6_TARGETS_DN	0.0142128	0.0895976	8.71761	9.54e-05	0.00122975
LY_AGING_MIDDLE_UP	0.0433917	-0.0349549	8.69764	9.67e-05	0.00124306
GRAHAM_CML_DIVIDING_VS_NORMAL_DIVIDING_DN	-0.0193629	0.133861	-8.68303	9.77e-05	0.00124997
WANG_METASTASIS_OF_BREAST_CANCER_ESR1_UP	-0.0158623	0.357417	-8.68143	9.78e-05	0.00124997
SCHUETZ_BREAST_CANCER_DUCTAL_INVASIVE_DN	0.0127536	0.241704	8.66983	9.86e-05	0.00125644
STEIN_ESTROGEN_RESPONSE_NOT_VIA_ESRRA	0.0202605	0.164833	8.65457	9.96e-05	0.00126197
ZHENG_IL22_SIGNALING_UP	0.0169295	0.00251602	8.6536	9.97e-05	0.00126197
TAKEDA_TARGETS_OF_NUP98_HOXA9_FUSION_6HR_DN	0.0138505	0.197602	8.65149	9.98e-05	0.00126197
SIMBULAN_PARP1_TARGETS_DN	-0.0248303	0.382665	-8.6383	0.000100703	0.00126993
NAKAMURA_BRONCHIAL_AND_BRONCHIOLAR_EPITHELIA	0.0248417	-0.069568	8.63115	0.000101194	0.00127274
YANG_BCL3_TARGETS_DN	-0.0374522	-0.0485446	-8.5699	0.000105515	0.00132355
BROCKE_APOPTOSIS_REVERSED_BY_IL6	0.0117972	0.223789	8.56152	0.000106122	0.00132584
CASTELLANO_HRAS_TARGETS_UP	-0.01675	0.223924	-8.55966	0.000106258	0.00132584
BENPORATH_ES_1	-0.0135329	0.271797	-8.54885	0.000107048	0.00133219
POOLA_INVASIVE_BREAST_CANCER_UP	-0.0131772	0.0829974	-8.52433	0.000108867	0.00135126
BIOCARTA_ATRBRCA_PATHWAY	-0.0407268	0.235079	-8.51022	0.000109929	0.00135954
KEGG_ETHER_LIPID_METABOLISM	0.0159801	0.172025	8.50786	0.000110109	0.00135954
BOYERINAS_ONCOFETAL_TARGETS_OF_LET7A1	0.0195556	0.295298	8.47731	0.000112454	0.00138489
LINDGREN_BLADDER_CANCER_CLUSTER_3_UP	-0.0136558	0.289771	-8.46864	0.00011313	0.00138959
LOPEZ_MESOTHELIOMA_SURVIVAL_OVERALL_UP	-0.0185167	-0.0649301	-8.45475	0.000114223	0.00139938
REACTOME_MRNA_3_END_PROCESSING	-0.0135667	0.399851	-8.44913	0.000114669	0.00140121
FARMER_BREAST_CANCER_CLUSTER_6	0.0209944	0.319101	8.4421	0.000115229	0.00140443
OSADA_ASCL1_TARGETS_UP	0.021589	0.068437	8.4353	0.000115774	0.00140539
PETROVA_ENDOTHELIUM_LYMPHATIC_VS_BLOOD_UP	-0.0127485	0.216668	-8.43318	0.000115945	0.00140539
PUJANA_CHEK2_PCC_NETWORK	-0.0131599	0.345972	-8.42739	0.000116412	0.00140539
REACTOME_CHROMOSOME_MAINTENANCE	-0.016511	0.166273	-8.42635	0.000116496	0.00140539
REICHERT_G1S_REGULATORS_AS_PI3K_TARGETS	-0.0236386	0.204775	-8.40392	0.000118328	0.00142385
ALONSO_METASTASIS_NEURAL_UP	0.0241179	0.244126	8.39467	0.000119093	0.00142941
XU_HGF_SIGNALING_NOT_VIA_AKT1_48HR_UP	0.0147308	0.2362	8.38878	0.000119582	0.0014313
REACTOME_THROMBOXANE_SIGNALLING_THROUGH_TP_RECEPTOR	0.0169536	0.16731	8.38552	0.000119855	0.0014313
STEIN_ESRRA_TARGETS_RESPONSIVE_TO_ESTROGEN_DN	-0.0158841	0.246461	-8.34571	0.000123237	0.00146798
LIM_MAMMARY_LUMINAL_MATURE_UP	0.012118	0.22083	8.33005	0.000124598	0.00148046
KOBAYASHI_EGFR_SIGNALING_24HR_UP	0.0116177	0.23037	8.29132	0.000128036	0.00151217
BENPORATH_CYCLING_GENES	-0.0143899	0.287985	-8.2889	0.000128255	0.00151217
XU_HGF_SIGNALING_NOT_VIA_AKT1_48HR_DN	-0.0257573	0.270331	-8.28808	0.000128329	0.00151217
BIOCARTA_ATM_PATHWAY	-0.0328383	0.275809	-8.2827	0.000128816	0.00151217
VANDESLUIS_COMMD1_TARGETS_GROUP_3_DN	0.025706	0.0903177	8.27704	0.000129332	0.00151217
KOINUMA_COLON_CANCER_MSI_DN	0.0301406	0.361926	8.27664	0.000129368	0.00151217
WEST_ADRENOCORTICAL_TUMOR_MARKERS_UP	-0.0188959	0.234748	-8.27307	0.000129695	0.00151217
HALMOS_CEBPA_TARGETS_UP	0.0198274	0.134086	8.27143	0.000129844	0.00151217
CHANGOLKAR_H2AFY_TARGETS_DN	0.0142925	0.164763	8.26816	0.000130145	0.00151217
LI_CISPLATIN_RESISTANCE_DN	0.0218324	0.14938	8.21766	0.000134881	0.00155544
WONG_ENDMETRIUM_CANCER_UP	0.0241117	0.152757	8.21345	0.000135285	0.00155544
KIM_MYCL1_AMPLIFICATION_TARGETS_DN	-0.013266	0.291745	-8.2122	0.000135406	0.00155544
KUROKAWA_LIVER_CANCER_EARLY_RECURRENCE_DN	-0.0329085	0.313756	-8.20965	0.000135651	0.00155544
LU_TUMOR_VASCULATURE_DN	0.0628051	-0.186042	8.20871	0.000135742	0.00155544
REACTOME_REGULATION_OF_GLUCOKINASE_BY_GLUCOKINASE_REGULATORY_PROTEIN	-0.0225588	0.340393	-8.20715	0.000135892	0.00155544
HU_GENOTOXIC_DAMAGE_4HR	-0.0237246	0.331843	-8.20394	0.000136202	0.00155544
RAMJAUN_APOPTOSIS_BY_TGFB1_VIA_SMAD4_UP	-0.0217705	0.247354	-8.19183	0.000137381	0.00155544
JAATINEN_HEMATOPOIETIC_STEM_CELL_DN	0.0126031	0.0574074	8.19126	0.000137436	0.00155544
RIZ_ERYTHROID_DIFFERENTIATION	-0.0127349	0.300232	-8.19093	0.000137468	0.00155544
STREICHER_LSM1_TARGETS_DN	-0.0183253	0.143402	-8.19074	0.000137487	0.00155544
HOLLEMAN_ASPARAGINASE_RESISTANCE_B_ALL_DN	0.0138949	0.315273	8.17904	0.000138638	0.00156314
SARRIO_EPITHELIAL_MESENCHYMAL_TRANSITION_DN	0.0137667	0.238052	8.17711	0.000138828	0.00156314
DODD_NASOPHARYNGEAL_CARCINOMA_UP	0.0121747	0.142685	8.16551	0.000139982	0.00157239
MARIADASON_RESPONSE_TO_CURCUMIN_SULINDAC_7	-0.0139031	0.317777	-8.15269	0.000141269	0.00158134
DIRMEIER_LMP1_RESPONSE_EARLY	0.014616	0.25459	8.15092	0.000141448	0.00158134
MIKKELSEN_NPC_LCP_WITH_H3K4ME3	0.0124682	0.0840567	8.12671	0.00014392	0.00160518
REACTOME_REGULATION_OF_GENE_EXPRESSION_IN_BETA_CELLS	0.013814	0.145487	8.12199	0.000144407	0.00160683
KINSEY_TARGETS_OF_EWSR1_FLII_FUSION_UP	-0.0136448	0.287318	-8.10798	0.000145866	0.00161925
REACTOME_REMOVAL_OF_THE_FLAP_INTERMEDIATE_FROM_THE_C_STRAND	-0.0309731	0.309784	-8.09646	0.000147078	0.00162888
REACTOME_MITOTIC_G2_G2_M_PHASES	-0.0140942	0.317026	-8.09269	0.000147478	0.00162949
KORKOLA_YOLK_SAC_TUMOR_UP	-0.012133	0.336067	-8.08108	0.000148715	0.00163411
KEGG_NICOTINATE_AND_NICOTINAMIDE_METABOLISM	0.0182582	0.101242	8.07997	0.000148833	0.00163411
REACTOME_P2Y_RECEPTORS	0.0258626	-0.045049	8.07882	0.000148956	0.00163411
GUENTHER_GROWTH_SPHERICAL_VS_ADHERENT_UP	-0.0171989	0.0460484	-8.07583	0.000149278	0.00163411
AZARE_NEOPLASTIC_TRANSFORMATION_BY_STAT3_UP	0.0116053	0.183717	8.06798	0.000150124	0.00163958
WHITEHURST_PACLITAXEL_SENSITIVITY	0.0240264	0.141573	8.06088	0.000150895	0.0016442
WANG_RESPONSE_TO_GSK3_INHIBITOR_SB216763_DN	-0.0121037	0.246928	-8.04907	0.000152187	0.00165447
CHASSOT_SKIN_WOUND	0.0239947	0.0878177	8.03695	0.000153526	0.0016652
REACTOME_PLATELET_SENSITIZATION_BY_LDL	-0.0119483	0.354824	-8.02638	0.000154705	0.00167414
PHONG_TNF_RESPONSE_VIA_P38_PARTIAL	0.0186466	0.217123	8.0206	0.000155353	0.00167486
BILANGES_SERUM_SENSITIVE_VIA_TSC1	0.018651	0.249038	8.01948	0.000155479	0.00167486
COLLER_MYC_TARGETS_DN	0.028297	0.189286	7.99881	0.000157829	0.00169393
REACTOME_G_ALPHA_Q_SIGNALLING_EVENTS	0.0117419	0.0648616	7.99761	0.000157967	0.00169393
GRASEMANN_RETINOBLASTOMA_WITH_6P_AMPLIFICATION	-0.0144317	0.248065	-7.98884	0.000158976	0.0017009
MIKKELSEN_MEF_LCP_WITH_H3K27ME3	0.0228786	-0.0408504	7.95331	0.000163144	0.00173878
REACTOME_TERMINATION_OF_O_GLYCAN_BIOSYNTHESIS	0.0318181	0.0947862	7.95233	0.000163261	0.00173878
LANDIS_BREAST_CANCER_PROGRESSION_UP	0.0163848	0.347874	7.94932	0.00016362	0.00173878
SHARMA_PILOCYTIC_ASTROCYTOMA_LOCATION_UP	0.0318525	0.0726359	7.94131	0.000164579	0.00174506
WANG_MLL_TARGETS	0.0114262	0.0689269	7.93681	0.000165122	0.00174689
ONDER_CDH1_TARGETS_2_DN	0.0111841	0.208518	7.93329	0.000165547	0.00174748
DODD_NASOPHARYNGEAL_CARCINOMA_DN	-0.0147074	0.289459	-7.92207	0.000166912	0.00175797
AZARE_NEOPLASTIC_TRANSFORMATION_BY_STAT3_DN	0.0323851	0.185619	7.91617	0.000167634	0.00176165
REACTOME_MTORC1_MEDIATED_SIGNALLING	-0.0170412	0.356917	-7.89509	0.000170246	0.00178513
MATZUK_SPERMATOGONIA	-0.0264462	0.0813235	-7.89035	0.000170839	0.00178739
KEGG_CALCIUM_SIGNALING_PATHWAY	0.0125572	0.0881681	7.88419	0.000171614	0.00178786
CAIRO_HEPATOBLASTOMA_CLASSES_UP	-0.0129092	0.364238	-7.88399	0.00017164	0.00178786
LUCAS_HNF4A_TARGETS_UP	0.0133743	0.218559	7.87901	0.000172269	0.00179047
ALTEMEIER_RESPONSE_TO_LPS_WITH_MECHANICAL_VENTILATION	0.0162046	0.0670011	7.87288	0.000173048	0.00179461
WHITFIELD_CELL_CYCLE_G2	-0.0167104	0.287297	-7.86453	0.000174116	0.00180173
PID_BETA_CATENIN_NUC_PATHWAY	0.0124912	0.263731	7.85667	0.000175127	0.00180473
BURTON_ADIPOGENESIS_PEAK_AT_2HR	0.0190855	0.244471	7.85635	0.000175168	0.00180473
BUCKANOVICH_T_LYMPHOCYTE_HOMING_ON_TUMOR_UP	0.0177414	0.176202	7.84222	0.000177004	0.00181967
LIEN_BREAST_CARCINOMA_METAPLASTIC_VS_DUCTAL_DN	0.0203582	0.197801	7.83011	0.000178595	0.00183086
SATO_SILENCED_BY_DEACETYLATION_IN_PANCREATIC_CANCER	0.0138197	0.0503474	7.82702	0.000179002	0.00183086
KOBAYASHI_EGFR_SIGNALING_6HR_DN	0.0163967	0.236558	7.82513	0.000179253	0.00183086
PID_ARF6_PATHWAY	0.0188998	0.213322	7.80982	0.000181296	0.00184774
BOYAULT_LIVER_CANCER_SUBCLASS_G56_DN	0.0140369	0.22625	7.79993	0.00018263	0.00185052
FIGUEROA_AML_METHYLATION_CLUSTER_2_DN	0.0263361	0.0284054	7.79991	0.000182633	0.00185052
MARKEY_RB1_CHRONIC_LOF_UP	-0.0130477	0.211123	-7.7991	0.000182743	0.00185052
REACTOME_SYNTHESIS_OF_PE	-0.0340306	0.236995	-7.79389	0.00018345	0.00185371
KEGG_MELANOGENESIS	0.0110596	0.198934	7.78775	0.000184288	0.00185821
UDAYAKUMAR_MED1_TARGETS_DN	0.0133473	0.26921	7.77813	0.000185611	0.00186756
NABA_ECM_AFFILIATED	0.0132904	0.138235	7.76952	0.000186803	0.00187556
WATANABE_COLON_CANCER_MSI_VS_MSS_UP	-0.0127765	0.243313	-7.7663	0.000187252	0.00187609
CLASPER_LYMPHATIC_VESSELS_DURING_METASTASIS_UP	0.012045	0.170643	7.7424	0.000190617	0.00190576
SUZUKI_AMPLIFIED_IN_ORAL_CANCER	0.0381379	0.220833	7.73475	0.000191708	0.00191062
REACTOME_TRANSPORT_OF_MATURE_MRNA_DERIVED_FROM_AN_INTRONLESS_TRANSCRIPT	-0.0187478	0.35732	-7.73139	0.000192191	0.00191062
GRAHAM_CML_QUIESCENT_VS_NORMAL_QUIESCENT_UP	-0.0170129	0.228566	-7.73026	0.000192353	0.00191062
HAHTOLA_MYCOSIS_FUNGOIDES_CD4_DN	-0.0117632	0.339298	-7.72772	0.000192719	0.00191062
REACTOME_CLEAVAGE_OF_GROWING_TRANSCRIPT_IN_THE_TERMINATION_REGION_	-0.0146023	0.375717	-7.72207	0.000193534	0.00191469
MORI_PLASMA_CELL_UP	0.0141166	0.304503	7.71369	0.000194752	0.00191943
AMIT_SERUM_RESPONSE_120_MCF10A	0.0159224	0.223971	7.71256	0.000194917	0.00191943
GARGALOVIC_RESPONSE_TO_OXIDIZED_PHOSPHOLIPIDS_YELLOW_DN	0.0165755	0.286165	7.70903	0.000195432	0.00191943
GESERICK_TERT_TARGETS_DN	0.0159755	0.170691	7.70613	0.000195857	0.00191943
ALCALAY_AML_BY_NPM1_LOCALIZATION_DN	-0.0187086	0.207376	-7.70487	0.000196042	0.00191943
CROONQUIST_NRAS_VS_STROMAL_STIMULATION_DN	-0.0180216	0.23708	-7.69653	0.000197272	0.00192678
DORN_ADENOVIRUS_INFECTION_48HR_DN	0.0178527	0.340935	7.69426	0.000197608	0.00192678
MOREAUX_B_LYMPHOCYTE_MATURATION_BY_TACI_DN	-0.0139777	0.330303	-7.67684	0.00020021	0.00194135
DASU_IL6_SIGNALING_SCAR_DN	0.0253747	0.191892	7.67668	0.000200233	0.00194135
FONTAINE_FOLLICULAR_THYROID_ADENOMA_DN	0.0140048	0.207389	7.6753	0.000200441	0.00194135
GOZGIT_ESR1_TARGETS_DN	0.0156125	0.189407	7.67147	0.00020102	0.00194135
LI_WILMS_TUMOR_VS_FETAL_KIDNEY_2_DN	0.0123448	0.167264	7.67058	0.000201155	0.00194135
GRAHAM_CML_DIVIDING_VS_NORMAL_DIVIDING_UP	0.0305841	0.107739	7.65075	0.00020418	0.00196653
REACTOME_PURINE_CATABOLISM	0.0169575	0.290925	7.64088	0.000205706	0.0019772
DING_LUNG_CANCER_MUTATED_FREQUENTLY	-0.0248374	0.252471	-7.62911	0.000207541	0.00198842
REACTOME_NEP_NS2_INTERACTS_WITH_THE_CELLULAR_EXPORT_MACHINERY	-0.0204989	0.363415	-7.62801	0.000207714	0.00198842
MIKKELSEN_MEF_ICP_WITH_H3K4ME3_AND_H3K27ME3	0.0238124	-0.0630367	7.61148	0.000210327	0.00200936
MARIADASON_RESPONSE_TO_BUTYRATE_SULINDAC_4	-0.0155075	0.226337	-7.59768	0.000212537	0.00202638
VANTVEER_BREAST_CANCER_POOR_PROGNOSIS	-0.0142323	0.174661	-7.58477	0.000214629	0.00204147
BEGUM_TARGETS_OF_PAX3_FOXO1_FUSION_AND_PAX3	0.0285029	-0.0114598	7.5826	0.000214983	0.00204147
BAFNA_MUC4_TARGETS_DN	0.0163288	0.402187	7.57653	0.000215976	0.0020468
MANTOVANI_VIRAL_GPCR_SIGNALING_UP	0.0120717	0.152946	7.5644	0.000217977	0.00206163
SUNG_METASTASIS_STROMA_DN	-0.0164315	0.258876	-7.5595	0.000218791	0.0020652
DORN_ADENOVIRUS_INFECTION_24HR_DN	0.0169536	0.328376	7.54783	0.000220745	0.0020739
XU_HGF_TARGETS_INDUCED_BY_AKT1_48HR_UP	-0.0150769	0.194511	-7.54627	0.000221007	0.0020739
BERENJENO_TRANSFORMED_BY_RHOA_UP	-0.012146	0.313179	-7.54615	0.000221029	0.0020739
REACTOME_GLUCOSE_TRANSPORT	-0.01932	0.309898	-7.53329	0.000223207	0.00208786
SCIAN_INVERSED_TARGETS_OF_TP53_AND_TP73_UP	-0.0138295	0.179683	-7.53216	0.0002234	0.00208786
BIOCARTA_BARRESTIN_SRC_PATHWAY	0.0144726	0.36964	7.52906	0.000223929	0.00208868
CHARAFE_BREAST_CANCER_BASAL_VS_MESENCHYMAL_UP	0.0126579	0.294955	7.52341	0.000224898	0.00209359
FLECHNER_PBL_KIDNEY_TRANSPLANT_REJECTED_VS_OK_DN	0.0106225	0.369479	7.51781	0.000225863	0.00209563
REACTOME_ACYL_CHAIN_REMODELLING_OF_PC	0.0141531	0.157196	7.51697	0.000226009	0.00209563
KEGG_DRUG_METABOLISM_OTHER_ENZYMES	-0.0137842	0.0572864	-7.51444	0.000226447	0.00209563
GENTILE_UV_RESPONSE_CLUSTER_D8	0.0221025	0.327937	7.50566	0.000227974	0.00210564
BASSO_CD40_SIGNALING_DN	0.0191438	0.134146	7.49443	0.000229943	0.00211969
CROONQUIST_NRAS_SIGNALING_UP	0.021157	0.126812	7.48924	0.000230861	0.00212172
BERENJENO_TRANSFORMED_BY_RHOA_REVERSIBLY_DN	0.0185062	0.166751	7.48655	0.000231337	0.00212172
ODONNELL_TFRC_TARGETS_DN	-0.0223828	0.261431	-7.48558	0.000231509	0.00212172
ROY_WOUND_BLOOD_VESSEL_DN	0.0143836	0.371541	7.48151	0.000232234	0.00212237
PASTURAL_RIZ1_TARGETS_UP	-0.0223544	0.132793	-7.48014	0.000232478	0.00212237
KEGG_LONG_TERM_DEPRESSION	0.01639	0.209311	7.45032	0.000237871	0.00216742
DAIRKEE_CANCER_PRONE_RESPONSE_BPA	-0.0104384	0.349824	-7.44456	0.00023893	0.00217288
PID_ATM_PATHWAY	-0.0196124	0.300273	-7.42992	0.000241644	0.00219335
KHETCHOUMIAN_TRIM24_TARGETS_UP	0.0141817	0.194819	7.41728	0.000244017	0.00221064
GRAHAM_CML_QUIESCENT_VS_CML_DIVIDING_UP	0.0304237	0.110015	7.41453	0.000244536	0.00221111
BOYAULT_LIVER_CANCER_SUBCLASS_G6_DN	0.0123031	0.272538	7.4086	0.000245661	0.00221704
REACTOME_MITOTIC_G1_G1_S_PHASES	-0.0162597	0.307027	-7.40522	0.000246305	0.00221862
NABA_ECM_GLYCOPROTEINS	0.0107157	-0.0136739	7.40233	0.000246856	0.00221936
REACTOME_POST_TRANSLATIONAL_PROTEIN_MODIFICATION	0.0107815	0.211772	7.39792	0.000247701	0.00222273
LOPEZ_MESOTHELIOMA_SURVIVAL_OVERALL_DN	-0.0209083	0.314651	-7.39522	0.00024822	0.00222317
GUTIERREZ_CHRONIC_LYMPHOCYTIC_LEUKEMIA_UP	0.0268941	0.023736	7.38544	0.000250109	0.00223315
VART_KSHV_INFECTION_ANGIOGENIC_MARKERS_DN	0.0128679	0.106875	7.38456	0.000250279	0.00223315
DORN_ADENOVIRUS_INFECTION_32HR_DN	0.0161386	0.341319	7.38072	0.000251028	0.00223561
APPIERTO_RESPONSE_TO_FENRETINIDE_UP	0.0117443	0.28396	7.36461	0.000254189	0.00225227
MOHANKUMAR_TLX1_TARGETS_DN	0.0123721	0.12908	7.36213	0.00025468	0.00225227
BIOCARTA_TNFR2_PATHWAY	-0.0176651	0.199936	-7.36189	0.000254728	0.00225227
FONTAINE_PAPILLARY_THYROID_CARCINOMA_UP	0.0113356	0.305297	7.36151	0.000254803	0.00225227
ACOSTA_PROLIFERATION_INDEPENDENT_MYC_TARGETS_UP	-0.0104386	0.279761	-7.33858	0.000259395	0.00228858
POS_RESPONSE_TO_HISTAMINE_UP	-0.0117876	0.33472	-7.32269	0.000262634	0.00230591
BIOCARTA_NO1_PATHWAY	0.0160882	0.172176	7.31984	0.00026322	0.00230591
ICHIBA_GRAFT_VERSUS_HOST_DISEASE_35D_DN	-0.0102317	0.182956	-7.31759	0.000263682	0.00230591
CHUANG_OXIDATIVE_STRESS_RESPONSE_UP	0.0128244	0.271065	7.31759	0.000263682	0.00230591
REACTOME_ASPARAGINE_N_LINKED_GLYCOSYLATION	0.0127067	0.285443	7.31703	0.000263798	0.00230591
REACTOME_NITRIC_OXIDE_STIMULATES_GUANYLATE_CYCLASE	0.0211731	-0.10229	7.30974	0.000265307	0.00231482
VECCHI_GASTRIC_CANCER_EARLY_DN	0.0122835	-0.0367643	7.27479	0.000272678	0.00237476
BIOCARTA_NOS1_PATHWAY	0.0121929	0.247117	7.24899	0.000278268	0.00241847
ST_PAC1_RECEPTOR_PATHWAY	0.0154438	0.180029	7.24694	0.00027872	0.00241847
DELPUECH_FOXO3_TARGETS_DN	-0.013641	0.373095	-7.224	0.000283811	0.00245813
FARMER_BREAST_CANCER_CLUSTER_5	-0.0143129	0.301309	-7.20437	0.000288252	0.00249203
SMID_BREAST_CANCER_RELAPSE_IN_BONE_UP	0.0131889	0.142619	7.19645	0.000290066	0.00250147
HOEGERKORP_CD44_TARGETS_TEMPORAL_DN	0.0108762	0.232249	7.19499	0.000290401	0.00250147
ZHENG_GLIOBLASTOMA_PLASTICITY_DN	0.0136474	0.101745	7.18893	0.000291801	0.00250896
PETRETTO_LEFT_VENTRICLE_MASS_QTL_CIS_UP	0.0194438	0.290344	7.18655	0.000292351	0.00250913
REACTOME_CONVERSION_FROM_APC_C_CDC20_TO_APC_C_CDH1_IN_LATE_ANAPHASE	-0.0177746	0.268975	-7.18235	0.000293327	0.00251294
MIKKELSEN_IPS_ICP_WITH_H3K4ME3_AND_H327ME3	0.016373	0.00209198	7.17839	0.000294252	0.0025163
PICCALUGA_ANGIOIMMUNOBLASTIC_LYMPHOMA_UP	0.011401	0.0813425	7.16153	0.000298221	0.00254547
WANG_BARRETTS_ESOPHAGUS_AND_ESOPHAGUS_CANCER_DN	0.0193166	0.211676	7.15798	0.000299065	0.00254547
DEBOSSCHER_NFKB_TARGETS_REPRESSED_BY_GLUCOCORTICOIDS	0.0221072	0.00948744	7.15709	0.000299277	0.00254547
MATZUK_FERTILIZATION	0.0131613	0.294892	7.15106	0.000300717	0.00255313
MMS_MOUSE_LYMPH_HIGH_4HRS_UP	-0.0121094	0.383327	-7.14463	0.000302263	0.00256165
JAIN_NFKB_SIGNALING	-0.0139349	0.305334	-7.13796	0.000303875	0.00257071
CARDOSO_RESPONSE_TO_GAMMA_RADIATION_AND_3AB	-0.0164682	0.202801	-7.13405	0.000304823	0.00257412
REACTOME_TANDEM_PORE_DOMAIN_POTASSIUM_CHANNELS	0.0365558	-0.0643814	7.12763	0.000306391	0.00257878
FRASOR_TAMOXIFEN_RESPONSE_UP	0.0157615	0.28292	7.12732	0.000306465	0.00257878
TERAMOTO_OPN_TARGETS_CLUSTER_7	-0.0122107	0.254031	-7.12101	0.000308015	0.00258722
NABA_CORE_MATRISOME	0.0107912	-0.0299218	7.11806	0.000308742	0.00258873
ABBUD_LIF_SIGNALING_2_UP	0.0156314	0.249252	7.10884	0.000311029	0.00260329
KINSEY_TARGETS_OF_EWSR1_FLII_FUSION_DN	0.0108803	0.222494	7.10273	0.000312553	0.00260727
SEITZ_NEOPLASTIC_TRANSFORMATION_BY_8P_DELETION_UP	0.0178823	0.149987	7.10251	0.000312608	0.00260727
BIOCARTA_NFKB_PATHWAY	-0.0173235	0.188143	-7.1001	0.000313212	0.00260771
FOURNIER_ACINAR_DEVELOPMENT_EARLY_UP	0.0130956	0.32978	7.08013	0.00031827	0.00264517
VANTVEER_BREAST_CANCER_METASTASIS_DN	-0.0178366	0.28683	-7.07446	0.000319722	0.00265257
BIOCARTA_CERAMIDE_PATHWAY	-0.0144282	0.274066	-7.06789	0.000321417	0.00266196
ABRAHAM_ALPC_VS_MULTIPLE_MYELOMA_DN	-0.0158178	0.354335	-7.06272	0.000322755	0.00266837
PYEON_HPV_POSITIVE_TUMORS_DN	0.0314803	0.199694	7.03716	0.000329473	0.00271916
MAHADEVAN_GIST_MORPHOLOGICAL_SWITCH	0.0207526	0.116212	7.03073	0.000331187	0.00272854
ABE_VEGFA_TARGETS_30MIN	0.0191675	0.132472	7.02771	0.000331995	0.00272913
KEGG_ALPHA_LINOLENIC_ACID_METABOLISM	0.0230785	0.0313769	7.02453	0.000332849	0.00272913
NAKAMURA_CANCER_MICROENVIRONMENT_DN	-0.0204637	0.338935	-7.02401	0.00033299	0.00272913
SCHRAMM_INHBA_TARGETS_UP	-0.0152876	0.371402	-7.01778	0.00033467	0.00273816
REACTOME_PLATELET_CALCIUM_HOMEOSTASIS	0.0206761	0.110199	7.01057	0.000336631	0.00274595
ROZANOV_MMP14_CORRELATED	0.0143839	0.319932	7.00892	0.000337079	0.00274595
REACTOME_GLOBAL_GENOMIC_NER_GG_NER	-0.0192191	0.257446	-7.00615	0.000337837	0.00274595
LABBE_WNT3A_TARGETS_DN	0.0111409	0.187066	7.00575	0.000337945	0.00274595
TONKS_TARGETS_OF_RUNX1_RUNX1T1_FUSION_ERYTHROCYTE_UP	0.0124148	0.180746	7.0028	0.000338754	0.0027478
ROPERO_HDAC2_TARGETS	-0.0110704	0.179567	-6.9967	0.000340434	0.0027535
SCHURINGA_STAT5A_TARGETS_UP	0.0149118	0.198874	6.99481	0.000340957	0.0027535
DACOSTA_LOW_DOSE_UV_RESPONSE_VIA_ERCC3_XPCS_UP	0.0139272	0.128203	6.99391	0.000341204	0.0027535
BAFNA_MUC4_TARGETS_UP	0.0329334	0.215361	6.97573	0.000346276	0.00278674
KORKOLA_EMBRYONAL_CARCINOMA_UP	-0.0133557	0.287286	-6.97349	0.000346907	0.00278674
HERNANDEZ_ABERRANT_MITOSIS_BY_DOCETACEL_4NM_DN	0.0192159	0.345745	6.97284	0.000347091	0.00278674
STARK_BRAIN_22Q11_DELETION	0.0166854	0.154928	6.961	0.000350452	0.00280896
INGRAM_SHH_TARGETS_DN	0.0220599	0.12067	6.95877	0.000351087	0.00280929
CHESLER_BRAIN_D6MIT150_QTL_CIS	-0.0357756	-0.0662958	-6.95379	0.000352514	0.00281594
WARTERS_RESPONSE_TO_IR_SKIN	-0.0124	0.109485	-6.93628	0.000357584	0.00285163
GRANDVAUX_IRF3_TARGETS_UP	0.0218921	0.141293	6.93096	0.000359141	0.00285922
WANG_RESPONSE_TO_FORSKOLIN_UP	0.0168827	0.282638	6.91693	0.000363284	0.00288735
SHANK_TAL1_TARGETS_DN	0.0250183	0.0389796	6.91266	0.000364556	0.0028926
CHICAS_RB1_TARGETS_SENESCENT	-0.0108601	0.230375	-6.90886	0.000365692	0.00289674
BROWN_MYELOID_CELL_DEVELOPMENT_UP	0.0110925	0.200681	6.90354	0.000367291	0.00290455
REACTOME_APC_C_CDC20_MEDIATED_DEGRADATION_OF_CYCLIN_B	-0.0197582	0.316497	-6.88143	0.000374013	0.00295277
BIOCARTA_IL12_PATHWAY	-0.0223464	0.083992	-6.87904	0.000374749	0.00295365
SUNG_METASTASIS_STROMA_UP	0.0140529	0.266235	6.86505	0.000379087	0.00297812
DOANE_BREAST_CANCER_ESR1_UP	0.0146563	0.167304	6.86496	0.000379113	0.00297812
GUILLAUMOND_KLF10_TARGETS_DN	0.0167509	0.287154	6.85725	0.00038153	0.00299213
SENGUPTA_NASOPHARYNGEAL_CARCINOMA_DN	0.0138936	0.0863892	6.85131	0.000383402	0.00300184
KEGG_AXON_GUIDANCE	0.0106449	0.230474	6.84445	0.000385575	0.00301386
ABRAHAM_ALPC_VS_MULTIPLE_MYELOMA_UP	-0.0133111	0.240372	-6.83704	0.000387942	0.00301491
REACTOME_CELL_CYCLE_CHECKPOINTS	-0.0179883	0.319873	-6.8358	0.000388339	0.00301491
MIKKELSEN_ES_LCP_WITH_H3K4ME3_AND_H3K27ME3	0.0495612	-0.0531088	6.83562	0.000388397	0.00301491
MATTIOLI_MULTIPLE_MYELOMA_WITH_14Q32_TRANSLOCATIONS	0.0270565	0.180078	6.83482	0.000388655	0.00301491
CHICAS_RB1_TARGETS_GROWING	-0.0167058	0.230681	-6.83406	0.000388898	0.00301491
SHAFFER_IRF4_MULTIPLE_MYELOMA_PROGRAM	0.0133406	0.2581	6.82129	0.000393024	0.00304192
TRAYNOR_RETT_SYNDROM_UP	0.0335189	0.142643	6.81711	0.000394388	0.00304361
RICKMAN_TUMOR_DIFFERENTIATED_MODERATELY_VS_POORLY_DN	-0.0123391	0.408779	-6.81667	0.000394531	0.00304361
KEGG_GLYCOSPHINGOLIPID_BIOSYNTHESIS_GLOBO_SERIES	-0.0138416	0.216582	-6.81313	0.00039569	0.00304758
BANDRES_RESPONSE_TO_CARMUSTIN_MGMT_24HR_UP	0.0171776	0.308695	6.80063	0.000399808	0.0030743
LEE_EARLY_T_LYMPHOCYTE_DN	-0.0139205	0.130872	-6.78246	0.000405884	0.00311595
SMID_BREAST_CANCER_RELAPSE_IN_PLEURA_UP	0.0541275	0.0766067	6.77663	0.000407858	0.00312258
DORMOY_ELAVL1_TARGETS	-0.0187192	0.250662	-6.77601	0.000408068	0.00312258
NAKAYAMA_FGF2_TARGETS	0.00945735	0.0929783	6.77206	0.00040941	0.00312779
OXFORD_RALA_OR_RALB_TARGETS_UP	-0.0192763	0.319367	-6.76901	0.000410452	0.00313069
GARGALOVIC_RESPONSE_TO_OXIDIZED_PHOSPHOLIPIDS_BLACK_DN	0.0140616	0.22217	6.75594	0.000414943	0.00315969
REACTOME_TELOMERE_MAINTENANCE	-0.0144698	0.105682	-6.75407	0.000415591	0.00315969
DARWICHE_PAPILLOMA_RISK_HIGH_VS_LOW_UP	-0.013296	0.297432	-6.74926	0.00041726	0.00316579
BROWNE_HCMV_INFECTION_30MIN_UP	0.0156326	0.154836	6.74791	0.000417732	0.00316579
GALI_TP53_TARGETS_APOPTOTIC_UP	0.0144374	0.319842	6.73233	0.000423203	0.00320212
GYORFFY_DOXORUBICIN_RESISTANCE	0.0171896	0.157458	6.7117	0.000430572	0.00325268
TOYOTA_TARGETS_OF_MIR34B_AND_MIR34C	-0.0158416	0.278641	-6.70839	0.000431768	0.00325651
GAVIN_IL2_RESPONSIVE_FOXP3_TARGETS_DN	0.0210928	0.222118	6.7017	0.000434197	0.0032671
REACTOME_HOMOLOGOUS_RECOMBINATION_REPAIR_OF_REPLICATION_INDEPENDENT_DOUBLE_STRAND_BREAKS	-0.0382003	0.295946	-6.69961	0.00043496	0.0032671
HERNANDEZ_ABERRANT_MITOSIS_BY_DOCETACEL_2NM_DN	0.0135107	0.125356	6.69883	0.000435244	0.0032671
HEDVAT_ELF4_TARGETS_UP	0.0139182	0.0822006	6.69244	0.000437587	0.00327948
REACTOME_TIGHT_JUNCTION_INTERACTIONS	-0.015194	0.181448	-6.68447	0.000440524	0.00328795
LIM_MAMMARY_LUMINAL_PROGENITOR_UP	0.0167804	0.0760273	6.68409	0.000440669	0.00328795
REACTOME_SYNTHESIS_OF_BILE_ACIDS_AND_BILE_SALTS_VIA_24_HYDROXYCHOLESTEROL	0.0379262	0.00509111	6.68372	0.000440804	0.00328795
REACTOME_KINESINS	-0.0207245	0.246208	-6.67891	0.000442592	0.00329609
BIOCARTA_TNFR1_PATHWAY	-0.013448	0.330065	-6.66328	0.000448455	0.00333109
SERVITJA_LIVER_HNF1A_TARGETS_UP	-0.0121298	0.21432	-6.66263	0.0004487	0.00333109
REACTOME_EARLY_PHASE_OF_HIV_LIFE_CYCLE	-0.0234188	0.343367	-6.65712	0.00045079	0.00333681
KEGG_PHENYLALANINE_METABOLISM	0.0136453	0.098162	6.65687	0.000450882	0.00333681
MARIADASON_RESPONSE_TO_BUTYRATE_CURCUMIN_SULINDAC_TSA_1	0.0186307	0.351996	6.64954	0.000453681	0.00335228
REACTOME_THROMBIN_SIGNALLING_THROUGH_PROTEINASE_ACTIVATED_RECEPTORS_PARS	0.0112601	0.206134	6.6401	0.00045731	0.00337382
REACTOME_TRANSPORT_OF_RIBONUCLEOPROTEINS_INTO_THE_HOST_NUCLEUS	-0.0192587	0.357482	-6.63573	0.000459002	0.00338103
SEITZ_NEOPLASTIC_TRANSFORMATION_BY_8P_DELETION_DN	0.0130507	0.149456	6.63275	0.000460163	0.00338431
KEGG_PYRIMIDINE_METABOLISM	-0.0160995	0.225061	-6.62983	0.000461302	0.00338741
CORRADETTI_MTOR_PATHWAY_REGULATORS_DN	-0.0163607	0.304372	-6.61531	0.000467006	0.00342399
NAKAYAMA_SOFT_TISSUE_TUMORS_PCA1_UP	0.0212762	0.0743172	6.60861	0.000469666	0.00343816
PID_LYSOPHOSPHOLIPID_PATHWAY	0.00942394	0.286241	6.5939	0.000475568	0.00347599
LY_AGING_OLD_UP	0.0327229	-0.0344506	6.58106	0.000480791	0.00350873
PID_ER_NONGENOMIC_PATHWAY	0.0146337	0.273496	6.57647	0.000482671	0.0035095
AMIT_DELAYED_EARLY_GENES	0.0106742	0.293573	6.5762	0.000482781	0.0035095
REACTOME_SYNTHESIS_OF_DNA	-0.0190026	0.326931	-6.57537	0.000483122	0.0035095
DELACROIX_RAR_TARGETS_DN	0.0150814	0.234816	6.57222	0.000484422	0.00351355
PID_AURORA_B_PATHWAY	-0.0162356	0.315052	-6.56445	0.000487641	0.00353148
REACTOME_DOUBLE_STRAND_BREAK_REPAIR	-0.0298393	0.308789	-6.55277	0.000492522	0.00355142
NOUSHMEHR_GBM_GERMLINE_MUTATED	0.0162257	0.145066	6.55219	0.000492768	0.00355142
CONCANNON_APOPTOSIS_BY_EPOXOMICIN_DN	-0.0128093	0.225654	-6.55085	0.000493331	0.00355142
REACTOME_PYRIMIDINE_METABOLISM	-0.0122469	0.164356	-6.55069	0.000493398	0.00355142
BIOCARTA_AMI_PATHWAY	-0.0269606	-0.0631458	-6.54546	0.000495606	0.00356188
XU_AKT1_TARGETS_48HR	0.0235577	0.086841	6.54209	0.000497038	0.00356675
REACTOME_SYNTHESIS_OF_VERY_LONG_CHAIN_FATTY_ACYL_COAS	-0.0101488	0.320978	-6.53205	0.000501322	0.00359205
REACTOME_G1_S_TRANSITION	-0.0178824	0.317849	-6.52686	0.000503558	0.00359321
CREIGHTON_ENDOCRINE_THERAPY_RESISTANCE_3	0.0143664	0.263168	6.52671	0.000503622	0.00359321
DAVICIONI_PAX_FOXO1_SIGNATURE_IN_ARMS_DN	0.025142	0.140479	6.52638	0.000503763	0.00359321
GERY_CEBP_TARGETS	0.0115364	0.204067	6.51035	0.000510733	0.00363743
WANG_PROSTATE_CANCER_ANDROGEN_INDEPENDENT	-0.012657	0.25104	-6.5066	0.000512381	0.00364368
TAKEDA_TARGETS_OF_NUP98_HOXA9_FUSION_3D_UP	0.0144088	0.160587	6.50406	0.000513501	0.00364617
REACTOME_ABACAVIR_TRANSPORT_AND_METABOLISM	0.0347533	0.0875884	6.50192	0.000514442	0.00364737
ROZANOV_MMP14_TARGETS_DN	0.0108977	0.190334	6.49852	0.000515949	0.00365258
ABRAMSON_INTERACT_WITH_AIRE	-0.0151543	0.418451	-6.49423	0.000517854	0.00366058
ZERBINI_RESPONSE_TO_SULINDAC_DN	-0.0289417	0.325913	-6.49116	0.000519223	0.00366466
FOURNIER_ACINAR_DEVELOPMENT_LATE_2	-0.0101247	0.349188	-6.4879	0.000520683	0.00366466
REACTOME_PHASE1_FUNCTIONALIZATION_OF_COMPOUNDS	0.0207762	0.0113805	6.48773	0.000520756	0.00366466
WONG_EMBRYONIC_STEM_CELL_CORE	-0.0171727	0.351669	-6.47279	0.000527502	0.00370662
FERRANDO_T_ALL_WITH_MLL_ENL_FUSION_DN	-0.01792	0.337635	-6.46913	0.000529169	0.00371282
REACTOME_REGULATION_OF_THE_FANCONI_ANEMIA_PATHWAY	-0.0355625	0.289796	-6.45227	0.000536925	0.00376166
WARTERS_IR_RESPONSE_5GY	-0.0108154	0.136531	-6.44326	0.000541124	0.00378547
WU_APOPTOSIS_BY_CDKN1A_NOT_VIA_TP53	0.0105897	0.311871	6.44094	0.000542213	0.00378748
NOJIMA_SFRP2_TARGETS_UP	0.0155489	0.187755	6.43723	0.000543954	0.00379404
REACTOME_HS_GAG_DEGRADATION	-0.0210503	0.261829	-6.43151	0.000546656	0.0038037
BIOCARTA_EXTRINSIC_PATHWAY	-0.0205071	0.0986591	-6.43089	0.000546948	0.0038037
PARK_HSC_AND_MULTIPOTENT_PROGENITORS	-0.0116714	0.321587	-6.42184	0.000551255	0.00382071
THILLAINADESAN_ZNF217_TARGETS_UP	-0.0101983	0.277028	-6.42015	0.000552064	0.00382071
SOUCEK_MYC_TARGETS	0.0444385	-0.0194066	6.41955	0.000552351	0.00382071
RICKMAN_METASTASIS_UP	-0.00992848	0.226562	-6.41898	0.000552625	0.00382071
HOLLEMAN_DAUNORUBICIN_ALL_DN	-0.0137271	0.312048	-6.4118	0.00055608	0.00383898
RICKMAN_TUMOR_DIFFERENTIATED_MODERATELY_VS_POORLY_UP	0.00922625	0.231282	6.40692	0.000558442	0.00384531
REACTOME_REGULATION_OF_INSULIN_SECRETION	0.0133554	0.210389	6.40629	0.000558746	0.00384531
ZHOU_PANCREATIC_ENDOCRINE_PROGENITOR	0.030678	-0.0390604	6.40487	0.000559436	0.00384531
PID_ANTHRAX_PATHWAY	0.0131389	0.198325	6.3961	0.000563721	0.00386914
GUO_TARGETS_OF_IRS1_AND_IRS2	0.0109899	0.26895	6.38741	0.000567998	0.00388087
ST_WNT_BETA_CATENIN_PATHWAY	0.0102275	0.240333	6.38704	0.00056818	0.00388087
KEGG_CELL_ADHESION_MOLECULES_CAMS	-0.011671	0.0736149	-6.38646	0.000568467	0.00388087
MURAKAMI_UV_RESPONSE_6HR_DN	0.0287278	0.142676	6.38597	0.000568712	0.00388087
BRACHAT_RESPONSE_TO_CISPLATIN	-0.0147197	0.281185	-6.3841	0.00056964	0.0038816
MANTOVANI_NFKB_TARGETS_DN	-0.0103291	0.230968	-6.37502	0.000574163	0.00390628
BIOCARTA_AGPCR_PATHWAY	0.0156892	0.291968	6.37352	0.000574915	0.00390628
MITSIADES_RESPONSE_TO_APLIDIN_UP	0.00905455	0.225628	6.37022	0.000576575	0.00391194
REACTOME_O_LINKED_GLYCOSYLATION_OF_MUCINS	0.0214622	0.136856	6.3487	0.000587515	0.00397567
GENTLES_LEUKEMIC_STEM_CELL_UP	0.0133964	-0.00297932	6.34844	0.00058765	0.00397567
GYORFFY_MITOXANTRONE_RESISTANCE	0.017161	0.158673	6.34419	0.000589838	0.00398057
SIMBULAN_UV_RESPONSE_NORMAL_DN	0.00947961	0.327223	6.34377	0.000590058	0.00398057
REACTOME_METAL_ION_SLC_TRANSPORTERS	0.0149038	0.227859	6.33599	0.000594093	0.00399827
LIU_TARGETS_OF_VMYB_VS_CMYB_DN	0.012363	0.0981719	6.33497	0.000594621	0.00399827
PID_E2F_PATHWAY	-0.013988	0.274636	-6.33383	0.000595217	0.00399827
HERNANDEZ_MITOTIC_ARREST_BY_DOCETAXEL_2_DN	0.0255278	0.134415	6.33115	0.000596618	0.00399939
HASLINGER_B_CLL_WITH_13Q14_DELETION	0.00993862	0.244557	6.33027	0.000597076	0.00399939
GRADE_COLON_VS_RECTAL_CANCER_UP	0.0104432	0.196294	6.32463	0.000600038	0.00401355
DER_IFN_GAMMA_RESPONSE_DN	0.0160179	0.228589	6.32213	0.000601359	0.00401502
LAU_APOPTOSIS_CDKN2A_DN	0.0180468	0.317114	6.32099	0.000601956	0.00401502
ZWANG_EGF_PERSISTENTLY_UP	0.0176929	0.165809	6.31802	0.000603529	0.00401905
IWANAGA_E2F1_TARGETS_NOT_INDUCED_BY_SERUM	-0.0224116	0.232299	-6.31664	0.000604259	0.00401905
GRAHAM_CML_QUIESCENT_VS_NORMAL_DIVIDING_UP	0.017716	0.130456	6.31022	0.000607679	0.00403611
CHEOK_RESPONSE_TO_MERCAPTOPURINE_AND_LD_MTX_DN	-0.0180753	0.260517	-6.29482	0.000615971	0.00408545
PID_TCR_JNK_PATHWAY	-0.020597	0.258834	-6.28403	0.000621854	0.00411421
MIKI_COEXPRESSED_WITH_CYP19A1	0.032692	0.225237	6.28367	0.000622048	0.00411421
BRUECKNER_TARGETS_OF_MIRLET7A3_UP	0.0112119	0.27355	6.27381	0.000627486	0.00414439
BURTON_ADIPOGENESIS_PEAK_AT_8HR	0.0128909	0.275057	6.27079	0.00062916	0.00414439
MARSHALL_VIRAL_INFECTION_RESPONSE_DN	0.0197339	0.2255	6.27056	0.000629289	0.00414439
SESTO_RESPONSE_TO_UV_C1	0.0173518	0.300159	6.26907	0.000630116	0.00414439
REACTOME_ASSOCIATION_OF_TRIC_CCT_WITH_TARGET_PROTEINS_DURING_BIOSYNTHESIS	-0.00882683	0.355772	-6.26674	0.000631418	0.00414719
SHI_SPARC_TARGETS_DN	0.0141317	0.187758	6.2643	0.000632779	0.0041489
VANHARANTA_UTERINE_FIBROID_DN	0.00950771	0.213437	6.26313	0.000633433	0.0041489
PHONG_TNF_RESPONSE_NOT_VIA_P38	0.0088844	0.234247	6.25982	0.000635288	0.00415529
LI_CISPLATIN_RESISTANCE_UP	0.0284634	0.0828125	6.25817	0.000636219	0.00415563
AFFAR_YY1_TARGETS_DN	-0.0096346	0.213407	-6.25152	0.000639972	0.00417438
PEDERSEN_METASTASIS_BY_ERBB2_ISOFORM_5	0.0302865	0.218487	6.24904	0.000641377	0.00417682
BREUHAHN_GROWTH_FACTOR_SIGNALING_IN_LIVER_CANCER	0.0106457	0.311262	6.24775	0.000642112	0.00417682
YAO_TEMPORAL_RESPONSE_TO_PROGESTERONE_CLUSTER_3	0.0217619	0.160185	6.24224	0.000645256	0.00419151
SIG_CD40PATHWAYMAP	-0.00997409	0.202192	-6.2329	0.000650617	0.00422053
GOLDRATH_ANTIGEN_RESPONSE	-0.0126922	0.264808	-6.22703	0.00065402	0.00423679
WHITFIELD_CELL_CYCLE_S	-0.0220232	0.22842	-6.22338	0.000656142	0.00424473
PID_PLK1_PATHWAY	-0.01364	0.351583	-6.22149	0.000657244	0.00424605
REACTOME_S_PHASE	-0.0184166	0.322572	-6.21661	0.0006601	0.00425868
YAMASHITA_METHYLATED_IN_PROSTATE_CANCER	0.0230101	0.0083198	6.21275	0.000662372	0.00426752
KEGG_LYSINE_DEGRADATION	-0.0124145	0.27668	-6.21054	0.000663671	0.00427007
ZHENG_RESPONSE_TO_ARSENITE_DN	0.0147224	0.208905	6.20111	0.000669266	0.00430021
PIEPOLI_LGI1_TARGETS_UP	0.0188137	-0.046169	6.19772	0.000671291	0.00430738
ABDULRAHMAN_KIDNEY_CANCER_VHL_UP	-0.0536728	0.28674	-6.19317	0.000674017	0.004319
SCHUETZ_BREAST_CANCER_DUCTAL_INVASIVE_UP	0.00953653	0.0188936	6.18959	0.000676174	0.00432696
VECCHI_GASTRIC_CANCER_EARLY_UP	-0.00973992	0.293382	-6.18238	0.000680535	0.00434899
KEGG_TAURINE_AND_HYPOTAURINE_METABOLISM	-0.0193839	0.0536727	-6.18034	0.000681779	0.00435106
OUYANG_PROSTATE_CANCER_PROGRESSION_DN	0.0167274	0.352498	6.17407	0.000685608	0.0043696
SASSON_RESPONSE_TO_GONADOTROPHINS_DN	0.0106755	0.247888	6.17122	0.000687358	0.00437426
REACTOME_APOBEC3G_MEDIATED_RESISTANCE_TO_HIV1_INFECTION	-0.0181214	0.388026	-6.16933	0.000688515	0.00437426
XU_RESPONSE_TO_TRETINOIN_DN	0.0108701	0.328759	6.16836	0.000689115	0.00437426
GAUSSMANN_MLL_AF4_FUSION_TARGETS_A_DN	0.0096776	0.126168	6.16617	0.000690469	0.00437698
RICKMAN_HEAD_AND_NECK_CANCER_F	0.0166018	-0.0482412	6.16148	0.000693373	0.0043895
PLASARI_TGFB1_TARGETS_1HR_UP	0.0173839	0.135891	6.14099	0.000706217	0.00446484
REACTOME_GASTRIN_CREB_SIGNALLING_PATHWAY_VIA_PKC_AND_MAPK	0.0100411	0.118641	6.13388	0.00071074	0.00448744
FRASOR_RESPONSE_TO_ESTRADIOL_DN	0.0101017	0.231718	6.131	0.00071258	0.00449306
PID_AR_NONGENOMIC_PATHWAY	0.00939952	0.322754	6.12904	0.000713839	0.004495
REACTOME_DSCAM_INTERACTIONS	-0.0184986	0.188272	-6.12533	0.000716219	0.00450399
FIGUEROA_AML_METHYLATION_CLUSTER_5_DN	0.0114042	0.199614	6.11964	0.000719892	0.00451533
SMID_BREAST_CANCER_NORMAL_LIKE_UP	0.00906215	-0.0138326	6.11938	0.000720064	0.00451533
NAKAMURA_ADIPOGENESIS_LATE_UP	0.00900371	0.220704	6.11811	0.000720886	0.00451533
KEGG_FRUCTOSE_AND_MANNOSE_METABOLISM	-0.014722	0.254717	-6.11464	0.000723139	0.00452344
MATZUK_MEIOTIC_AND_DNA_REPAIR	-0.0181258	0.159838	-6.11121	0.000725376	0.00453145
MASSARWEH_TAMOXIFEN_RESISTANCE_UP	0.0151874	0.22775	6.10663	0.000728375	0.00454417
PID_IL27_PATHWAY	-0.0129879	0.141449	-6.10193	0.000731465	0.00455744
SMID_BREAST_CANCER_ERBB2_DN	0.0213361	0.0317963	6.09717	0.00073461	0.00457101
MATZUK_CENTRAL_FOR_FEMALE_FERTILITY	0.00874864	0.0674838	6.08892	0.0007401	0.00459685
AIYAR_COBRA1_TARGETS_UP	-0.0122961	0.21951	-6.08802	0.000740706	0.00459685
RHODES_UNDIFFERENTIATED_CANCER	-0.0198445	0.340633	-6.0774	0.000747844	0.0046343
ALONSO_METASTASIS_EMT_UP	0.0128471	0.278067	6.07614	0.0007487	0.0046343
REACTOME_AMINO_ACID_SYNTHESIS_AND_INTERCONVERSION_TRANSAMINATION	-0.0166535	0.358218	-6.07089	0.000752261	0.00465025
PID_RHOA_REG_PATHWAY	0.0149276	0.280456	6.06561	0.000755865	0.00466643
NEWMAN_ERCC6_TARGETS_UP	0.0213805	0.136268	6.05919	0.000760278	0.00468617
LUCAS_HNF4A_TARGETS_DN	-0.0373493	0.040358	-6.05807	0.000761045	0.00468617
REACTOME_NUCLEOTIDE_LIKE_PURINERGIC_RECEPTORS	0.0131135	-0.101978	6.0534	0.000764275	0.00469995
ACEVEDO_FGFR1_TARGETS_IN_PROSTATE_CANCER_MODEL_UP	0.00886435	0.203169	6.04244	0.000771916	0.00474077
ZHANG_ANTIVIRAL_RESPONSE_TO_RIBAVIRIN_DN	0.0118769	0.178812	6.03934	0.000774095	0.00474799
IWANAGA_E2F1_TARGETS_INDUCED_BY_SERUM	-0.0245304	0.219067	-6.03783	0.000775155	0.00474832
RHEIN_ALL_GLUCOCORTICOID_THERAPY_DN	-0.010739	0.32453	-6.03417	0.00077774	0.004758
REACTOME_STEROID_HORMONES	0.0209122	-0.0274594	6.02533	0.000784013	0.00479018
BHATTACHARYA_EMBRYONIC_STEM_CELL	-0.0120839	0.345997	-6.02242	0.000786093	0.0047955
PODAR_RESPONSE_TO_ADAPHOSTIN_UP	0.0111614	0.242253	6.02128	0.000786912	0.0047955
SERVITJA_ISLET_HNF1A_TARGETS_DN	0.0100889	0.144896	6.01715	0.000789878	0.00480738
GAL_LEUKEMIC_STEM_CELL_DN	-0.0100099	0.148233	-6.01363	0.000792411	0.00481233
CEBALLOS_TARGETS_OF_TP53_AND_MYC_DN	-0.00872918	0.251678	-6.0132	0.000792727	0.00481233
REACTOME_EGFR_DOWNREGULATION	0.0102066	0.362104	6.01125	0.000794138	0.00481472
PID_IL8_CXCR2_PATHWAY	0.011009	0.269935	6.00517	0.000798553	0.00483529
SCHLOSSER_MYC_TARGETS_REPRESSED_BY_SERUM	-0.00929163	0.372725	-6.0033	0.000799914	0.00483606
PID_SYNDECAN_4_PATHWAY	0.00950264	0.274284	6.00219	0.000800726	0.00483606
REACTOME_NEGATIVE_REGULATION_OF_THE_PI3K_AKT_NETWORK	0.0128538	0.295515	5.99676	0.000804703	0.00485274
KERLEY_RESPONSE_TO_CISPLATIN_UP	-0.0128301	0.159515	-5.99562	0.000805541	0.00485274
MCCOLLUM_GELDANAMYCIN_RESISTANCE_UP	0.0362795	0.112936	5.98098	0.000816395	0.00491187
GARGALOVIC_RESPONSE_TO_OXIDIZED_PHOSPHOLIPIDS_GREY_UP	0.0340615	0.129718	5.97683	0.000819506	0.0049225
GARCIA_TARGETS_OF_FLI1_AND_DAX1_DN	-0.011642	0.232929	-5.97584	0.000820244	0.0049225
CROMER_TUMORIGENESIS_UP	0.00923439	0.0870922	5.97141	0.000823578	0.00493625
WHITFIELD_CELL_CYCLE_G2_M	-0.0103211	0.295132	-5.96727	0.000826708	0.00494874
BOYAULT_LIVER_CANCER_SUBCLASS_G3_UP	-0.00828243	0.368899	-5.9588	0.000833156	0.00498103
WAGNER_APO2_SENSITIVITY	0.0173628	0.150179	5.95368	0.000837081	0.00499056
MATTIOLI_MGUS_VS_PCL	-0.0116808	0.368097	-5.95288	0.000837694	0.00499056
HUMMEL_BURKITTS_LYMPHOMA_UP	-0.0137962	0.154418	-5.9526	0.000837915	0.00499056
TERAO_AOX4_TARGETS_HG_UP	0.0117673	0.270868	5.94399	0.000844564	0.00502147
PID_P73PATHWAY	-0.00844616	0.256249	-5.94287	0.000845437	0.00502147
ST_TUMOR_NECROSIS_FACTOR_PATHWAY	-0.0103075	0.220577	-5.94078	0.000847062	0.00502147
FARMER_BREAST_CANCER_CLUSTER_3	0.0179413	0.228688	5.94041	0.000847352	0.00502147
AMIT_EGF_RESPONSE_60_HELA	0.0115867	0.262948	5.93745	0.000849664	0.00502887
MIYAGAWA_TARGETS_OF_EWSR1_ETS_FUSIONS_DN	0.0139561	0.118266	5.93033	0.000855247	0.00505558
HAN_SATB1_TARGETS_DN	0.00864562	0.220094	5.92844	0.000856733	0.0050562
BURTON_ADIPOGENESIS_2	0.00934076	0.260338	5.92727	0.000857664	0.0050562
LEE_TARGETS_OF_PTCH1_AND_SUFU_DN	0.0119338	0.0806195	5.92613	0.000858559	0.0050562
PEDERSEN_TARGETS_OF_611CTF_ISOFORM_OF_ERBB2	0.0129971	0.227674	5.91413	0.000868114	0.00510489
ACEVEDO_LIVER_CANCER_WITH_H3K9ME3_UP	0.0111047	0.0552679	5.91304	0.000868987	0.00510489
PYEON_HPV_POSITIVE_TUMORS_UP	-0.0250221	0.21133	-5.90985	0.000871552	0.00511361
ZHENG_RESPONSE_TO_ARSENITE_UP	0.0120361	0.146574	5.90591	0.000874724	0.00512586
TARTE_PLASMA_CELL_VS_B_LYMPHOCYTE_UP	0.0151676	0.303045	5.90415	0.000876151	0.00512787
ZWANG_CLASS_2_TRANSIENTLY_INDUCED_BY_EGF	0.0129595	0.119316	5.89746	0.000881582	0.00515328
CHIANG_LIVER_CANCER_SUBCLASS_CTNNB1_DN	0.0093573	0.0848248	5.88629	0.000890741	0.00520039
WANG_BARRETTS_ESOPHAGUS_UP	0.0197466	0.243609	5.8839	0.000892712	0.00520209
FARMER_BREAST_CANCER_CLUSTER_7	0.0198995	0.211177	5.88327	0.000893232	0.00520209
TING_SILENCED_BY_DICER	0.012959	0.110687	5.85979	0.0009129	0.00531009
BIOCARTA_SKP2E2F_PATHWAY	-0.0208001	0.316928	-5.85377	0.000918021	0.00533332
RAY_TUMORIGENESIS_BY_ERBB2_CDC25A_DN	0.00886313	0.22901	5.84629	0.000924429	0.00536396
ZHOU_CELL_CYCLE_GENES_IN_IR_RESPONSE_2HR	-0.0157282	0.238074	-5.84428	0.000926157	0.00536739
OSWALD_HEMATOPOIETIC_STEM_CELL_IN_COLLAGEN_GEL_UP	0.00822336	0.231682	5.84154	0.000928528	0.00537455
RICKMAN_TUMOR_DIFFERENTIATED_WELL_VS_POORLY_UP	-0.0100345	0.281589	-5.83633	0.000933043	0.00539409
JECHLINGER_EPITHELIAL_TO_MESENCHYMAL_TRANSITION_DN	0.00839017	0.28556	5.82569	0.000942343	0.00544119
SASSON_FSH_RESPONSE	0.0167987	0.230783	5.81368	0.000952966	0.00549583
WANG_THOC1_TARGETS_UP	-0.0258066	0.174361	-5.81091	0.000955436	0.00550335
PID_EPHB_FWD_PATHWAY	0.0122715	0.338338	5.80867	0.000957442	0.00550821
MODY_HIPPOCAMPUS_NEONATAL	0.0119367	0.287023	5.80174	0.000963663	0.00553725
HOFFMANN_SMALL_PRE_BII_TO_IMMATURE_B_LYMPHOCYTE_UP	-0.0117735	0.161142	-5.79763	0.000967381	0.00555058
LANDIS_ERBB2_BREAST_TUMORS_65_DN	0.0173614	0.240986	5.79658	0.000968329	0.00555058
MAHADEVAN_IMATINIB_RESISTANCE_DN	0.0155994	-0.0130548	5.7939	0.000970766	0.00555781
ZHAN_MULTIPLE_MYELOMA_MF_DN	0.0258601	0.175727	5.79202	0.000972473	0.00556085
BIOCARTA_GPCR_PATHWAY	0.00940093	0.315082	5.78939	0.000974869	0.00556782
WANG_HCP_PROSTATE_CANCER	0.00983691	0.262727	5.78215	0.000981511	0.00558913
REACTOME_SYNTHESIS_AND_INTERCONVERSION_OF_NUCLEOTIDE_DI_AND_TRIPHOSPHATES	-0.0177767	0.312993	-5.78186	0.000981777	0.00558913
HERNANDEZ_ABERRANT_MITOSIS_BY_DOCETACEL_4NM_UP	0.0191737	0.0238457	5.78146	0.000982146	0.00558913
EPPERT_PROGENITOR	-0.0115342	0.302501	-5.77926	0.000984177	0.00559396
WANG_METASTASIS_OF_BREAST_CANCER	0.0177451	0.208392	5.77475	0.000988352	0.00561095
SEIKE_LUNG_CANCER_POOR_SURVIVAL	0.0279241	-0.0903782	5.77272	0.000990241	0.00561493
REACTOME_POTASSIUM_CHANNELS	0.00895757	-0.0644768	5.77002	0.00099275	0.00562241
PATIL_LIVER_CANCER	-0.00825944	0.303216	-5.76788	0.000994748	0.00562699
LI_PROSTATE_CANCER_EPIGENETIC	0.0159521	0.154272	5.76331	0.000999036	0.00563511
INAMURA_LUNG_CANCER_SCC_UP	-0.0131302	0.285222	-5.76184	0.00100041	0.00563511
REACTOME_TRANSPORT_OF_VITAMINS_NUCLEOSIDES_AND_RELATED_MOLECULES	0.0185861	0.161797	5.76092	0.00100128	0.00563511
MARKS_ACETYLATED_NON_HISTONE_PROTEINS	-0.0110413	0.329175	-5.76082	0.00100137	0.00563511
DAZARD_UV_RESPONSE_CLUSTER_G3	0.0159482	0.225624	5.76	0.00100214	0.00563511
JAEGER_METASTASIS_UP	-0.0123277	0.214894	-5.7561	0.00100583	0.00564916
BIOCARTA_MITOCHONDRIA_PATHWAY	0.0129793	0.228531	5.74972	0.00101189	0.00567643
TUOMISTO_TUMOR_SUPPRESSION_BY_COL13A1_DN	-0.0275389	-0.0569761	-5.74826	0.00101328	0.0056775
CERVERA_SDHB_TARGETS_1_UP	0.00937123	0.0618158	5.74583	0.00101561	0.00568379
LIU_VAV3_PROSTATE_CARCINOGENESIS_DN	0.0111416	0.200454	5.74252	0.00101877	0.00569479
CUI_TCF21_TARGETS_DN	0.0118131	0.198894	5.74116	0.00102008	0.00569537
ZHAN_MULTIPLE_MYELOMA_MS_UP	0.0117873	0.101288	5.73934	0.00102183	0.0056984
BOQUEST_STEM_CELL_UP	0.00815021	0.0349178	5.73653	0.00102455	0.00570016
MYLLYKANGAS_AMPLIFICATION_HOT_SPOT_16	-0.0136916	0.350298	-5.73652	0.00102456	0.00570016
SHEN_SMARCA2_TARGETS_DN	0.00913105	0.0268891	5.73397	0.00102702	0.00570715
MCDOWELL_ACUTE_LUNG_INJURY_DN	0.0129471	0.130296	5.72718	0.00103363	0.00573715
ZIRN_TRETINOIN_RESPONSE_DN	0.0240945	0.291602	5.72406	0.00103668	0.00574732
MATZUK_SPERMATOCYTE	-0.0114021	0.174443	-5.7176	0.00104303	0.00577576
LU_TUMOR_ENDOTHELIAL_MARKERS_UP	0.0207698	-0.0558279	5.71351	0.00104707	0.00579133
SMIRNOV_RESPONSE_TO_IR_6HR_UP	-0.00821351	0.188213	-5.70575	0.00105479	0.00582722
FOSTER_KDM1A_TARGETS_UP	0.0125164	0.056361	5.69796	0.0010626	0.00585855
BIOCARTA_TID_PATHWAY	-0.0217198	0.206792	-5.69678	0.0010638	0.00585855
PODAR_RESPONSE_TO_ADAPHOSTIN_DN	0.0127795	0.317477	5.6964	0.00106418	0.00585855
SCHLOSSER_MYC_TARGETS_AND_SERUM_RESPONSE_UP	-0.0132723	0.364692	-5.69422	0.00106638	0.00586385
MEISSNER_NPC_HCP_WITH_H3K4ME2_AND_H3K27ME3	0.0100235	0.00203314	5.68896	0.00107172	0.00588635
SHIN_B_CELL_LYMPHOMA_CLUSTER_3	-0.0195033	0.0666384	-5.6835	0.00107728	0.00589662
REACTOME_ANDROGEN_BIOSYNTHESIS	0.0293582	-0.0806806	5.68349	0.00107729	0.00589662
CHEN_HOXA5_TARGETS_6HR_DN	0.038412	0.0332059	5.68346	0.00107733	0.00589662
PENG_LEUCINE_DEPRIVATION_UP	-0.00912423	0.282951	-5.68176	0.00107906	0.00589923
REACTOME_COMPLEMENT_CASCADE	0.033148	0.0187651	5.68056	0.0010803	0.00589923
ROY_WOUND_BLOOD_VESSEL_UP	0.0106557	0.0486997	5.67691	0.00108405	0.00590911
WANG_RESPONSE_TO_PACLITAXEL_VIA_MAPK8_UP	0.023509	0.283689	5.67637	0.00108461	0.00590911
PUJANA_BRCA1_PCC_NETWORK	-0.00830325	0.32539	-5.6729	0.00108819	0.0059218
WAKABAYASHI_ADIPOGENESIS_PPARG_BOUND_36HR	-0.00805603	0.247031	-5.66199	0.00109955	0.00597674
SPIELMAN_LYMPHOBLAST_EUROPEAN_VS_ASIAN_2FC_DN	0.0164842	0.0245749	5.65715	0.00110462	0.00599744
ROSS_ACUTE_MYELOID_LEUKEMIA_CBF	0.00781067	0.160044	5.65424	0.00110769	0.00600031
BOYLAN_MULTIPLE_MYELOMA_C_D_DN	0.0095684	0.122604	5.65424	0.00110769	0.00600031
RASHI_RESPONSE_TO_IONIZING_RADIATION_2	0.0100757	0.266969	5.65294	0.00110907	0.00600091
NIELSEN_GIST_VS_SYNOVIAL_SARCOMA_DN	0.0135634	-0.0333045	5.64688	0.0011155	0.00602879
DAZARD_UV_RESPONSE_CLUSTER_G28	0.0216322	0.0917501	5.64405	0.00111851	0.00603819
REACTOME_DESTABILIZATION_OF_MRNA_BY_KSRP	-0.0106549	0.287268	-5.62799	0.00113581	0.00612456
LASTOWSKA_COAMPLIFIED_WITH_MYCN	-0.008344	0.191501	-5.62464	0.00113945	0.00613721
SENGUPTA_NASOPHARYNGEAL_CARCINOMA_UP	-0.0197207	0.231846	-5.61282	0.00115241	0.00619706
WANG_RESPONSE_TO_PACLITAXEL_VIA_MAPK8_DN	0.0107841	0.240548	5.61213	0.00115319	0.00619706
FEVR_CTNNB1_TARGETS_UP	0.0088735	0.221472	5.60814	0.0011576	0.00621374
GALINDO_IMMUNE_RESPONSE_TO_ENTEROTOXIN	0.0100014	0.235073	5.6025	0.00116387	0.00624011
YAO_TEMPORAL_RESPONSE_TO_PROGESTERONE_CLUSTER_8	0.00874762	0.275514	5.60101	0.00116555	0.00624011
BIOCARTA_P53_PATHWAY	-0.0198042	0.271541	-5.60018	0.00116647	0.00624011
SCIBETTA_KDM5B_TARGETS_DN	-0.0130873	0.267916	-5.59446	0.00117289	0.00626735
AMIT_EGF_RESPONSE_60_MCF10A	0.0167103	0.200037	5.58424	0.00118447	0.00632207
HERNANDEZ_ABERRANT_MITOSIS_BY_DOCETACEL_2NM_UP	0.0109904	0.142537	5.58096	0.00118822	0.00633492
GARCIA_TARGETS_OF_FLI1_AND_DAX1_UP	-0.00936301	0.200718	-5.57408	0.00119611	0.00636075
DELYS_THYROID_CANCER_UP	0.00954879	0.223538	5.57371	0.00119653	0.00636075
GAUSSMANN_MLL_AF4_FUSION_TARGETS_D_DN	-0.0120126	0.279818	-5.57292	0.00119745	0.00636075
MITSIADES_RESPONSE_TO_APLIDIN_DN	-0.0164008	0.368499	-5.57206	0.00119844	0.00636075
SAMOLS_TARGETS_OF_KHSV_MIRNAS_DN	0.0105575	0.234761	5.56925	0.00120169	0.00637082
GOUYER_TATI_TARGETS_UP	0.0262757	0.215578	5.56558	0.00120595	0.00638458
REACTOME_AKT_PHOSPHORYLATES_TARGETS_IN_THE_CYTOSOL	0.0106304	0.281503	5.5644	0.00120732	0.00638458
CHICAS_RB1_TARGETS_LOW_SERUM	-0.0195498	0.245667	-5.56353	0.00120833	0.00638458
CALVET_IRINOTECAN_SENSITIVE_VS_RESISTANT_DN	0.0120618	0.322389	5.55155	0.00122237	0.00645158
YANG_MUC2_TARGETS_DUODENUM_3MO_DN	0.0233584	0.199929	5.54407	0.00123124	0.00649112
URS_ADIPOCYTE_DIFFERENTIATION_UP	0.0111744	0.161591	5.54031	0.00123572	0.00650749
MIKKELSEN_MCV6_LCP_WITH_H3K4ME3	0.0168491	0.151028	5.53796	0.00123853	0.0065099
BROWNE_HCMV_INFECTION_12HR_UP	0.0107786	0.213824	5.53763	0.00123893	0.0065099
DAVICIONI_RHABDOMYOSARCOMA_PAX_FOXO1_FUSION_DN	0.0317059	0.18668	5.53388	0.00124344	0.00652632
FUJIWARA_PARK2_HEPATOCYTE_PROLIFERATION_DN	0.0194794	0.145795	5.53129	0.00124656	0.00653545
LEE_LIVER_CANCER_CIPROFIBRATE_UP	0.00907686	0.175926	5.52618	0.00125274	0.0065606
STEGER_ADIPOGENESIS_UP	0.0245237	0.084229	5.52065	0.00125947	0.00658854
SMID_BREAST_CANCER_LUMINAL_B_DN	0.00868009	0.0875379	5.51377	0.00126791	0.00662535
FOSTER_TOLERANT_MACROPHAGE_UP	0.00806679	0.160397	5.51228	0.00126974	0.00662761
REACTOME_PROLACTIN_RECEPTOR_SIGNALING	-0.0104985	0.203872	-5.5028	0.00128149	0.00668154
MOREAUX_MULTIPLE_MYELOMA_BY_TACI_UP	0.00844	0.153001	5.49846	0.0012869	0.00670235
REACTOME_CASPASE_MEDIATED_CLEAVAGE_OF_CYTOSKELETAL_PROTEINS	0.0129348	0.278965	5.49065	0.00129671	0.00674604
ZHAN_EARLY_DIFFERENTIATION_GENES_DN	-0.0131577	0.269082	-5.48853	0.0012994	0.00675257
KYNG_WERNER_SYNDROM_DN	0.0114747	0.231312	5.48484	0.00130407	0.00676942
NOUSHMEHR_GBM_SILENCED_BY_METHYLATION	0.00890128	0.110562	5.48052	0.00130957	0.00679052
REACTOME_LIGAND_GATED_ION_CHANNEL_TRANSPORT	0.0318563	-0.137738	5.4785	0.00131214	0.00679642
XU_RESPONSE_TO_TRETINOIN_AND_NSC682994_UP	0.0152886	0.267573	5.47084	0.00132198	0.00683987
KEGG_LONG_TERM_POTENTIATION	0.0125117	0.272553	5.46859	0.0013249	0.00684747
PID_HIF1A_PATHWAY	-0.0159516	0.321616	-5.46572	0.0013286	0.00685706
SIG_REGULATION_OF_THE_ACTIN_CYTOSKELETON_BY_RHO_GTPASES	0.00960571	0.321065	5.46492	0.00132965	0.00685706
BIOCARTA_LEPTIN_PATHWAY	0.011141	0.284113	5.45598	0.00134131	0.00689552
KONDO_PROSTATE_CANCER_WITH_H3K27ME3	0.0124823	-0.0772554	5.45547	0.00134197	0.00689552
REACTOME_INTEGRATION_OF_ENERGY_METABOLISM	0.0116206	0.228212	5.455	0.00134259	0.00689552
ENK_UV_RESPONSE_EPIDERMIS_DN	0.00791088	0.246272	5.45473	0.00134294	0.00689552
SMID_BREAST_CANCER_BASAL_DN	0.00773385	0.173962	5.45104	0.00134781	0.00691299
TAKEDA_TARGETS_OF_NUP98_HOXA9_FUSION_8D_UP	0.0116422	0.131502	5.43653	0.00136708	0.00700425
PAL_PRMT5_TARGETS_UP	-0.0120741	0.315074	-5.43275	0.00137216	0.00702266
SHEDDEN_LUNG_CANCER_GOOD_SURVIVAL_A4	0.0103682	0.174686	5.42909	0.00137709	0.00704027
ZWANG_EGF_INTERVAL_UP	0.0126511	0.102644	5.42722	0.00137963	0.00704563
BIOCARTA_CK1_PATHWAY	0.0108819	0.23876	5.42012	0.00138926	0.0070872
WATTEL_AUTONOMOUS_THYROID_ADENOMA_UP	0.010219	0.155603	5.41866	0.00139127	0.00708976
SWEET_LUNG_CANCER_KRAS_DN	0.00852573	0.127208	5.41739	0.001393	0.00709094
ROVERSI_GLIOMA_LOH_REGIONS	0.0239103	0.159806	5.41226	0.00140003	0.0071191
PID_AURORA_A_PATHWAY	-0.0100667	0.346267	-5.40726	0.00140693	0.00714642
REACTOME_ACTIVATION_OF_CHAPERONE_GENES_BY_XBP1S	0.0121941	0.357053	5.40618	0.00140843	0.00714642
IWANAGA_CARCINOGENESIS_BY_KRAS_DN	0.00796574	0.201889	5.40485	0.00141028	0.00714814
TAKEDA_TARGETS_OF_NUP98_HOXA9_FUSION_3D_DN	0.0130768	0.176838	5.39554	0.00142326	0.00720622
BIOCARTA_RHO_PATHWAY	0.0130414	0.367193	5.39177	0.00142856	0.00722257
WILLIAMS_ESR1_TARGETS_UP	-0.0107343	0.243411	-5.39107	0.00142955	0.00722257
TCGA_GLIOBLASTOMA_COPY_NUMBER_DN	-0.0106397	0.196572	-5.37639	0.00145039	0.00731961
HAHTOLA_CTCL_PATHOGENESIS	0.0195855	-0.0193549	5.37458	0.00145299	0.00731961
LANDIS_BREAST_CANCER_PROGRESSION_DN	0.0129138	0.186219	5.37371	0.00145425	0.00731961
CHO_NR4A1_TARGETS	0.0176452	0.178152	5.37322	0.00145494	0.00731961
REACTOME_HYALURONAN_METABOLISM	0.0133627	0.180616	5.37036	0.00145906	0.00733156
GAUSSMANN_MLL_AF4_FUSION_TARGETS_F_DN	-0.00952357	0.147066	-5.36848	0.00146177	0.00733156
KEGG_OOCYTE_MEIOSIS	-0.00755626	0.27492	-5.36835	0.00146197	0.00733156
REACTOME_KERATAN_SULFATE_BIOSYNTHESIS	0.0122985	0.151	5.36686	0.00146412	0.00733458
RODRIGUES_DCC_TARGETS_UP	0.0331882	0.285274	5.36345	0.00146907	0.00735157
ISHIKAWA_STING_SIGNALING	0.0170374	0.22098	5.36097	0.00147268	0.00736184
REACTOME_ACYL_CHAIN_REMODELLING_OF_PE	0.00962199	0.11817	5.3581	0.00147687	0.00737497
LEE_NEURAL_CREST_STEM_CELL_UP	0.00908589	0.130665	5.3569	0.00147862	0.00737593
SU_KIDNEY	0.0280546	-0.114613	5.34344	0.00149847	0.00746711
UEDA_PERIFERAL_CLOCK	0.008313	0.290933	5.32511	0.00152599	0.00759623
KIM_WT1_TARGETS_12HR_DN	0.00801943	0.303223	5.3237	0.00152813	0.00759889
MUELLER_PLURINET	-0.0132971	0.303847	-5.32247	0.00153	0.0076002
BONOME_OVARIAN_CANCER_POOR_SURVIVAL_DN	-0.0168504	0.279126	-5.32014	0.00153354	0.00760979
TERAMOTO_OPN_TARGETS_CLUSTER_4	-0.0112493	0.276525	-5.31803	0.00153676	0.00761552
LIU_VAV3_PROSTATE_CARCINOGENESIS_UP	0.0111442	0.0838388	5.31728	0.00153792	0.00761552
SESTO_RESPONSE_TO_UV_C2	0.014166	0.362246	5.31112	0.00154737	0.00764892
ZWANG_CLASS_3_TRANSIENTLY_INDUCED_BY_EGF	0.0168621	0.224849	5.31078	0.0015479	0.00764892
WENG_POR_TARGETS_GLOBAL_UP	0.0234947	0.176467	5.30383	0.00155865	0.00769401
PLASARI_TGFB1_TARGETS_10HR_UP	0.00859771	0.128682	5.30272	0.00156038	0.00769451
KIM_WT1_TARGETS_UP	0.0117158	0.241711	5.29473	0.00157287	0.00774802
GAUSSMANN_MLL_AF4_FUSION_TARGETS_B_UP	0.011135	0.143867	5.29022	0.00157997	0.00777489
SCHRAETS_MLL_TARGETS_UP	0.0106042	0.167309	5.28666	0.00158558	0.00779441
LEI_HOXC8_TARGETS_UP	0.0229138	0.0946439	5.27902	0.00159774	0.007846
REACTOME_CELL_SURFACE_INTERACTIONS_AT_THE_VASCULAR_WALL	-0.00991085	0.184822	-5.27629	0.0016021	0.00785928
MYLLYKANGAS_AMPLIFICATION_HOT_SPOT_3	-0.0238303	0.306098	-5.27277	0.00160776	0.00787622
REACTOME_ACTIVATED_AMPK_STIMULATES_FATTY_ACID_OXIDATION_IN_MUSCLE	0.0138245	0.201931	5.27207	0.00160889	0.00787622
ZHONG_RESPONSE_TO_AZACITIDINE_AND_TSA_UP	0.00905365	0.168364	5.27041	0.00161157	0.00788118
KORKOLA_SEMINOMA_DN	0.0475367	-0.0189998	5.26473	0.00162075	0.00791791
FUJIWARA_PARK2_IN_LIVER_CANCER_UP	0.0274857	0.323742	5.26263	0.00162417	0.00792643
KEGG_NUCLEOTIDE_EXCISION_REPAIR	-0.014178	0.256784	-5.26147	0.00162606	0.00792745
LE_SKI_TARGETS_UP	0.0111511	0.269887	5.25624	0.0016346	0.00796089
TSAI_RESPONSE_TO_RADIATION_THERAPY	0.0203732	0.14931	5.2494	0.00164587	0.00800753
CREIGHTON_ENDOCRINE_THERAPY_RESISTANCE_5	0.013607	0.258448	5.24811	0.001648	0.00800964
REACTOME_CGMP_EFFECTS	0.0133046	-0.0996223	5.23718	0.00166618	0.00804998
PID_MAPK_TRK_PATHWAY	0.00862927	0.276077	5.23697	0.00166654	0.00804998
NIKOLSKY_BREAST_CANCER_20P13_AMPLICON	-0.028625	0.180683	-5.23665	0.00166708	0.00804998
BOYLAN_MULTIPLE_MYELOMA_D_DN	0.00948491	0.189037	5.23616	0.0016679	0.00804998
CERVERA_SDHB_TARGETS_2	0.0106594	0.0777817	5.23597	0.00166822	0.00804998
RIZ_ERYTHROID_DIFFERENTIATION_HEMGN	0.00933592	0.207013	5.23589	0.00166835	0.00804998
KONDO_COLON_CANCER_HCP_WITH_H3K27ME1	-0.0142761	0.255036	-5.23512	0.00166964	0.00804998
KYNG_NORMAL_AGING_DN	0.0129692	0.251175	5.23464	0.00167045	0.00804998
KEGG_GAP_JUNCTION	0.0111097	0.184062	5.23395	0.00167162	0.00804998
RANKIN_ANGIOGENIC_TARGETS_OF_VHL_HIF2A_UP	0.0176115	0.338412	5.22823	0.00168125	0.00808661
BIOCARTA_VIP_PATHWAY	-0.0102728	0.255235	-5.22671	0.00168383	0.00808661
GRAHAM_CML_QUIESCENT_VS_CML_DIVIDING_DN	-0.0335534	0.241278	-5.2264	0.00168435	0.00808661
RODRIGUES_THYROID_CARCINOMA_POORLY_DIFFERENTIATED_UP	-0.0130152	0.30497	-5.22196	0.0016919	0.00810996
REACTOME_REGULATION_OF_AMPK_ACTIVITY_VIA_LKB1	0.012187	0.240113	5.22153	0.00169265	0.00810996
WU_CELL_MIGRATION	0.00916053	0.230022	5.21655	0.00170116	0.00814249
KANG_FLUOROURACIL_RESISTANCE_DN	0.0118899	0.363207	5.20799	0.0017159	0.00819762
REACTOME_REGULATION_OF_BETA_CELL_DEVELOPMENT	0.00743092	0.126111	5.20633	0.00171878	0.00819762
PID_SMAD2_3PATHWAY	-0.0138501	0.374964	-5.20559	0.00172007	0.00819762
DING_LUNG_CANCER_MUTATED_SIGNIFICANTLY	-0.0257986	0.298308	-5.2053	0.00172058	0.00819762
BIOCARTA_CFTR_PATHWAY	0.00939532	0.343053	5.20439	0.00172214	0.00819762
KRASNOSELSKAYA_ILF3_TARGETS_DN	-0.0117433	0.255218	-5.20386	0.00172308	0.00819762
HUANG_DASATINIB_RESISTANCE_UP	0.00736229	0.245971	5.20086	0.0017283	0.00821164
CHARAFE_BREAST_CANCER_LUMINAL_VS_MESENCHYMAL_UP	0.0102694	0.293054	5.19922	0.00173117	0.00821164
BILBAN_B_CLL_LPL_DN	0.00993603	0.237291	5.19918	0.00173123	0.00821164
GRATIAS_RETINOBLASTOMA_16Q24	-0.0102658	0.387151	-5.19707	0.00173494	0.00822095
REACTOME_SIGNAL_REGULATORY_PROTEIN_SIRP_FAMILY_INTERACTIONS	0.00955399	0.322084	5.19602	0.00173676	0.00822138
GRADE_COLON_AND_RECTAL_CANCER_UP	-0.00995992	0.36408	-5.19058	0.00174635	0.00825849
REACTOME_RAP1_SIGNALLING	0.00902848	0.248787	5.18759	0.00175165	0.00827528
YAMAZAKI_TCEB3_TARGETS_UP	0.00811421	0.286997	5.17446	0.00177509	0.00837762
SEIDEN_MET_SIGNALING	-0.00963244	0.399885	-5.16765	0.00178739	0.0084185
REACTOME_A_TETRASACCHARIDE_LINKER_SEQUENCE_IS_REQUIRED_FOR_GAG_SYNTHESIS	-0.0154716	0.204979	-5.16696	0.00178863	0.0084185
BIOCARTA_AKAP13_PATHWAY	0.0166548	0.325036	5.16648	0.0017895	0.0084185
PID_TXA2PATHWAY	0.00763479	0.249388	5.16514	0.00179195	0.0084185
BOQUEST_STEM_CELL_CULTURED_VS_FRESH_DN	0.0254223	-0.0167838	5.16475	0.00179265	0.0084185
TONKS_TARGETS_OF_RUNX1_RUNX1T1_FUSION_SUSTAINED_IN_MONOCYTE_UP	0.00914868	0.24524	5.16072	0.0018	0.00844213
IZADPANAH_STEM_CELL_ADIPOSE_VS_BONE_DN	0.00879646	0.130503	5.16004	0.00180125	0.00844213
FRIDMAN_IMMORTALIZATION_DN	0.0116884	0.21466	5.15556	0.00180945	0.00846954
KANG_GLIS3_TARGETS	0.0244855	-0.0453976	5.1549	0.00181068	0.00846954
CHANDRAN_METASTASIS_DN	0.00744224	0.161959	5.15121	0.00181748	0.00849295
MISSIAGLIA_REGULATED_BY_METHYLATION_UP	0.0167968	0.255984	5.14492	0.00182914	0.008539
GARGALOVIC_RESPONSE_TO_OXIDIZED_PHOSPHOLIPIDS_BLUE_UP	0.0121257	0.230664	5.14089	0.00183666	0.00856457
REACTOME_OTHER_SEMAPHORIN_INTERACTIONS	0.0184107	0.244916	5.14004	0.00183824	0.00856457
CHANG_CORE_SERUM_RESPONSE_DN	0.00961962	0.221803	5.13128	0.00185473	0.00863289
WANG_LSD1_TARGETS_DN	0.0111999	0.0714467	5.12149	0.00187333	0.00871089
TONKS_TARGETS_OF_RUNX1_RUNX1T1_FUSION_SUSTAINDED_IN_ERYTHROCYTE_UP	0.0117153	0.203364	5.11667	0.00188256	0.00874523
REACTOME_INHIBITION_OF_INSULIN_SECRETION_BY_ADRENALINE_NORADRENALINE	-0.00976885	0.180306	-5.11356	0.00188856	0.00876445
WANG_METHYLATED_IN_BREAST_CANCER	0.0100313	0.239844	5.09997	0.00191499	0.00887208
ACEVEDO_FGFR1_TARGETS_IN_PROSTATE_CANCER_MODEL_DN	0.00751704	0.0941225	5.09971	0.0019155	0.00887208
KONDO_HYPOXIA	0.0182374	0.131019	5.09461	0.00192553	0.00890982
HARRIS_HYPOXIA	0.00950329	0.217905	5.09343	0.00192785	0.00891184
BHAT_ESR1_TARGETS_NOT_VIA_AKT1_UP	0.0100007	0.201798	5.09152	0.00193163	0.00892059
REACTOME_SLBP_DEPENDENT_PROCESSING_OF_REPLICATION_DEPENDENT_HISTONE_PRE_MRNAS	-0.0191947	0.311316	-5.08903	0.00193655	0.00893459
ZEMBUTSU_SENSITIVITY_TO_VINCRISTINE	-0.00696995	0.238671	-5.08367	0.00194724	0.00897514
REACTOME_IMMUNOREGULATORY_INTERACTIONS_BETWEEN_A_LYMPHOID_AND_A_NON_LYMPHOID_CELL	-0.00772013	0.0274916	-5.0788	0.00195699	0.00901131
MAYBURD_RESPONSE_TO_L663536_DN	-0.0105828	0.310256	-5.07083	0.00197307	0.00906819
HOFFMAN_CLOCK_TARGETS_DN	0.0210902	0.0287419	5.06889	0.001977	0.00906819
REACTOME_ASSOCIATION_OF_LICENSING_FACTORS_WITH_THE_PRE_REPLICATIVE_COMPLEX	-0.0189708	0.264719	-5.0686	0.00197758	0.00906819
NIKOLSKY_BREAST_CANCER_5P15_AMPLICON	0.0129188	0.227257	5.06731	0.00198021	0.00906819
KEGG_ENDOCYTOSIS	0.00736781	0.272201	5.06705	0.00198073	0.00906819
TERAO_AOX4_TARGETS_HG_DN	0.0176114	0.228075	5.06685	0.00198114	0.00906819
MELLMAN_TUT1_TARGETS_UP	-0.0094647	0.365609	-5.06605	0.00198277	0.00906819
PEREZ_TP63_TARGETS	0.00810044	0.116465	5.06511	0.00198469	0.00906819
GROSS_ELK3_TARGETS_DN	0.0187494	0.152134	5.06379	0.0019874	0.00907182
YAO_HOXA10_TARGETS_VIA_PROGESTERONE_UP	0.0129158	0.0969183	5.06201	0.00199103	0.00907913
ENGELMANN_CANCER_PROGENITORS_UP	0.00806159	0.177598	5.06113	0.00199284	0.00907913
VALK_AML_WITH_11Q23_REARRANGED	0.020714	0.061676	5.06008	0.00199499	0.0090802
MCBRYAN_PUBERTAL_TGFB1_TARGETS_DN	0.0101987	0.311811	5.04951	0.00201681	0.00917068
WAMUNYOKOLI_OVARIAN_CANCER_GRADES_1_2_UP	0.00825059	0.349547	5.03579	0.00204555	0.0092924
SHARMA_PILOCYTIC_ASTROCYTOMA_LOCATION_DN	0.0285082	0.0552326	5.0146	0.00209083	0.00948899
HORIUCHI_WTAP_TARGETS_UP	0.0113099	0.151536	5.01054	0.00209962	0.00951977
MANTOVANI_VIRAL_GPCR_SIGNALING_DN	0.011058	0.185591	5.00919	0.00210258	0.00952403
PID_PI3KCI_AKT_PATHWAY	0.00833375	0.349085	5.00674	0.00210791	0.00953905
BIOCARTA_DREAM_PATHWAY	0.0128537	0.281034	4.99297	0.00213821	0.00966692
LIU_CMYB_TARGETS_DN	-0.0150496	0.304267	-4.9893	0.00214637	0.00969456
PASINI_SUZ12_TARGETS_DN	0.00805849	0.278851	4.98824	0.00214874	0.00969596
CAFFAREL_RESPONSE_TO_THC_8HR_3_DN	-0.0100257	0.371681	-4.9847	0.00215665	0.00972239
CUI_TCF21_TARGETS_2_UP	-0.0131852	0.206861	-4.97898	0.00216952	0.00977111
BOYAULT_LIVER_CANCER_SUBCLASS_G123_UP	-0.00814014	0.33623	-4.97525	0.00217795	0.00979069
KANG_GIST_WITH_PDGFRA_DN	0.0142289	0.318667	4.97522	0.00217801	0.00979069
REACTOME_SIGNAL_AMPLIFICATION	0.0105208	0.219956	4.97003	0.0021898	0.00983437
CHEBOTAEV_GR_TARGETS_UP	0.00804621	0.143435	4.96228	0.00220755	0.00990442
HOELZEL_NF1_TARGETS_UP	0.0152005	0.145783	4.96139	0.00220959	0.00990442
GRAHAM_CML_QUIESCENT_VS_NORMAL_DIVIDING_DN	-0.0229345	0.267563	-4.95913	0.00221481	0.0099184
GAVIN_FOXP3_TARGETS_CLUSTER_P7	0.0146908	0.186026	4.95147	0.00223257	0.00997373
RICKMAN_TUMOR_DIFFERENTIATED_WELL_VS_MODERATELY_DN	0.00907261	0.160887	4.9511	0.00223343	0.00997373
SASSON_RESPONSE_TO_FORSKOLIN_UP	0.00882611	0.289233	4.95107	0.00223349	0.00997373
KEGG_PPAR_SIGNALING_PATHWAY	0.0112989	0.159268	4.93495	0.00227142	0.0101336
PID_TAP63_PATHWAY	0.00732143	0.281422	4.93072	0.00228148	0.0101688
PEREZ_TP53_AND_TP63_TARGETS	0.00992738	0.116903	4.92893	0.00228577	0.0101727
KOHOUTEK_CCNT1_TARGETS	0.0107253	0.229401	4.92856	0.00228666	0.0101727
LI_WILMS_TUMOR_ANAPLASTIC_DN	0.0297776	0.0805867	4.91744	0.00231345	0.0102822
KEGG_PROGESTERONE_MEDIATED_OOCYTE_MATURATION	-0.00862665	0.262292	-4.91523	0.0023188	0.0102963
GRAHAM_CML_DIVIDING_VS_NORMAL_QUIESCENT_DN	0.0140322	0.153344	4.8969	0.00236386	0.0104866
PLASARI_NFIC_TARGETS_BASAL_UP	0.0107697	0.0706792	4.89195	0.00237617	0.0105276
REACTOME_GPCR_DOWNSTREAM_SIGNALING	0.00731607	0.0356321	4.8914	0.00237756	0.0105276
REACTOME_INTEGRATION_OF_PROVIRUS	-0.00725772	0.4237	-4.89	0.00238107	0.0105333
REACTOME_SYNTHESIS_OF_PC	-0.0119526	0.246521	-4.88288	0.00239895	0.0106023
SANCHEZ_MDM2_TARGETS	0.0251979	0.229604	4.88201	0.00240115	0.0106023
TURJANSKI_MAPK8_AND_MAPK9_TARGETS	-0.00983456	0.320054	-4.87474	0.00241961	0.0106738
LEE_LIVER_CANCER_SURVIVAL_DN	-0.00902773	0.375218	-4.87336	0.00242314	0.0106794
FOURNIER_ACINAR_DEVELOPMENT_LATE_UP	0.014556	-0.0670617	4.87065	0.00243007	0.0107
JACKSON_DNMT1_TARGETS_DN	0.0107042	0.280618	4.86878	0.00243487	0.0107112
HEIDENBLAD_AMPLIFIED_IN_BONE_CANCER	-0.0319164	0.217751	-4.86602	0.00244197	0.0107324
MEISSNER_BRAIN_HCP_WITH_H3K4ME2_AND_H3K27ME3	0.0109303	0.0477656	4.85857	0.00246124	0.0108071
KAAB_FAILED_HEART_VENTRICLE_DN	-0.0147861	0.265333	-4.85541	0.00246949	0.0108332
REACTOME_RECRUITMENT_OF_MITOTIC_CENTROSOME_PROTEINS_AND_COMPLEXES	-0.0116011	0.323983	-4.85314	0.0024754	0.0108474
KEGG_BUTANOATE_METABOLISM	-0.0187886	0.228376	-4.85199	0.00247841	0.0108474
BOHN_PRIMARY_IMMUNODEFICIENCY_SYNDROM_UP	-0.012656	0.29658	-4.85154	0.0024796	0.0108474
FLECHNER_PBL_KIDNEY_TRANSPLANT_OK_VS_DONOR_DN	0.00665915	0.305697	4.84955	0.00248481	0.0108588
DOUGLAS_BMI1_TARGETS_UP	-0.00724036	0.252077	-4.84798	0.00248893	0.0108588
WANG_NFKB_TARGETS	0.0171099	0.152722	4.84793	0.00248909	0.0108588
CHIANG_LIVER_CANCER_SUBCLASS_POLYSOMY7_UP	0.0115016	0.125869	4.84642	0.00249306	0.0108661
EBAUER_MYOGENIC_TARGETS_OF_PAX3_FOXO1_FUSION	0.013041	0.0756353	4.84533	0.00249592	0.0108685
HAHTOLA_CTCL_CUTANEOUS	-0.00761845	0.328494	-4.84319	0.00250158	0.0108832
KEGG_PURINE_METABOLISM	-0.0111826	0.194463	-4.83882	0.00251319	0.0109236
KEGG_GRAFT_VERSUS_HOST_DISEASE	-0.0177802	-0.0298255	-4.83678	0.00251863	0.0109372
GAVIN_FOXP3_TARGETS_CLUSTER_P3	0.00964405	0.189622	4.83468	0.00252424	0.0109515
REACTOME_MEMBRANE_TRAFFICKING	0.00875401	0.32019	4.83247	0.00253014	0.010967
BHAT_ESR1_TARGETS_VIA_AKT1_DN	0.0181353	0.24269	4.82686	0.00254525	0.0110224
REACTOME_DIABETES_PATHWAYS	0.00837108	0.277988	4.82536	0.0025493	0.0110262
CHARAFE_BREAST_CANCER_BASAL_VS_MESENCHYMAL_DN	0.0108106	0.045086	4.82481	0.00255078	0.0110262
REACTOME_PROSTACYCLIN_SIGNALLING_THROUGH_PROSTACYCLIN_RECEPTOR	-0.0125783	0.152888	-4.82323	0.00255506	0.0110293
FRASOR_RESPONSE_TO_ESTRADIOL_UP	0.0104441	0.135398	4.82282	0.00255616	0.0110293
SESTO_RESPONSE_TO_UV_C3	0.0135764	0.218052	4.81865	0.0025675	0.0110681
REACTOME_FATTY_ACID_TRIACYLGLYCEROL_AND_KETONE_BODY_METABOLISM	0.00791755	0.256347	4.81108	0.00258823	0.0111473
SCHUHMACHER_MYC_TARGETS_UP	-0.00951571	0.325144	-4.80583	0.00260272	0.0111849
WU_HBX_TARGETS_3_UP	-0.0142108	0.230747	-4.80556	0.00260347	0.0111849
GENTLES_LEUKEMIC_STEM_CELL_DN	-0.0194098	0.133296	-4.80534	0.00260406	0.0111849
GENTILE_UV_RESPONSE_CLUSTER_D9	0.00996048	0.350258	4.80063	0.00261716	0.011231
IIZUKA_LIVER_CANCER_PROGRESSION_L1_G1_UP	0.0103101	0.202932	4.78963	0.002648	0.011353
WEINMANN_ADAPTATION_TO_HYPOXIA_DN	0.0141404	0.171647	4.78532	0.00266019	0.011395
LINDGREN_BLADDER_CANCER_CLUSTER_1_DN	-0.00739677	0.248374	-4.78342	0.00266557	0.0114077
HAN_SATB1_TARGETS_UP	0.00685367	0.210498	4.77984	0.00267577	0.011441
BIOCARTA_CALCINEURIN_PATHWAY	0.00935847	0.304883	4.77683	0.00268437	0.0114674
DAZARD_UV_RESPONSE_CLUSTER_G2	0.0187749	0.193061	4.77447	0.00269115	0.011486
SA_CASPASE_CASCADE	0.0133175	0.213482	4.76918	0.00270641	0.0115407
KUROKAWA_LIVER_CANCER_CHEMOTHERAPY_DN	-0.010297	0.302174	-4.76266	0.00272535	0.0115997
REACTOME_UNBLOCKING_OF_NMDA_RECEPTOR_GLUTAMATE_BINDING_AND_ACTIVATION	0.0104544	0.0416502	4.76169	0.00272817	0.0115997
FUJII_YBX1_TARGETS_UP	0.0146138	0.181966	4.7611	0.00272989	0.0115997
REACTOME_HORMONE_SENSITIVE_LIPASE_HSL_MEDIATED_TRIACYLGLYCEROL_HYDROLYSIS	0.00834618	0.274437	4.76104	0.00273007	0.0115997
REACTOME_G_ALPHA_S_SIGNALLING_EVENTS	0.00753356	0.0142117	4.7569	0.00274218	0.0116407
KORKOLA_EMBRYONAL_CARCINOMA_DN	0.0430006	-0.0410418	4.75531	0.00274684	0.0116501
HUANG_FOXA2_TARGETS_DN	0.0105996	0.173961	4.75304	0.00275353	0.0116679
BIOCARTA_G1_PATHWAY	-0.0107145	0.301709	-4.75136	0.00275848	0.0116785
ODONNELL_TFRC_TARGETS_UP	0.00677696	0.157334	4.75044	0.00276122	0.0116796
REACTOME_REGULATION_OF_HYPOXIA_INDUCIBLE_FACTOR_HIF_BY_OXYGEN	-0.0102534	0.300207	-4.74837	0.00276735	0.0116951
NIKOLSKY_BREAST_CANCER_16Q24_AMPLICON	-0.0167704	0.230189	-4.74682	0.00277193	0.011704
CHANG_POU5F1_TARGETS_UP	0.00908925	0.118788	4.74388	0.00278068	0.0117305
OZEN_MIR125B1_TARGETS	-0.0134009	0.340188	-4.74165	0.00278735	0.0117481
MCDOWELL_ACUTE_LUNG_INJURY_UP	0.00766026	0.184082	4.73947	0.00279387	0.0117651
MIKKELSEN_NPC_HCP_WITH_H3K27ME3	0.0118385	-0.00394318	4.73163	0.00281748	0.011854
REACTOME_MHC_CLASS_II_ANTIGEN_PRESENTATION	-0.00743722	0.311805	-4.72993	0.00282264	0.0118651
BIOCARTA_CARDIACEGF_PATHWAY	-0.00708743	0.283723	-4.72537	0.00283648	0.0119127
SHEPARD_CRUSH_AND_BURN_MUTANT_DN	-0.0126924	0.257022	-4.72241	0.00284554	0.0119402
ALONSO_METASTASIS_DN	0.0100366	0.157189	4.71712	0.00286178	0.0119892
BASAKI_YBX1_TARGETS_UP	-0.0103546	0.273744	-4.71695	0.00286229	0.0119892
KEGG_VASCULAR_SMOOTH_MUSCLE_CONTRACTION	0.0112914	0.17026	4.71511	0.00286795	0.0119937
LABBE_TGFB1_TARGETS_UP	0.0117386	0.190634	4.71495	0.00286845	0.0119937
BANDRES_RESPONSE_TO_CARMUSTIN_WITHOUT_MGMT_48HR_UP	0.0125666	0.192082	4.7102	0.00288315	0.0120445
GERHOLD_ADIPOGENESIS_DN	0.0128533	0.271745	4.70644	0.00289487	0.01208
HELLER_HDAC_TARGETS_SILENCED_BY_METHYLATION_UP	0.00718783	0.163034	4.70583	0.00289676	0.01208
NAKAMURA_LUNG_CANCER_DIFFERENTIATION_MARKERS	0.0132103	-0.142291	4.70208	0.0029085	0.0121183
KEGG_BASE_EXCISION_REPAIR	-0.016643	0.267628	-4.69923	0.00291744	0.0121449
REACTOME_ACTIVATION_OF_KAINATE_RECEPTORS_UPON_GLUTAMATE_BINDING	0.0108497	0.18126	4.69612	0.00292726	0.012175
UDAYAKUMAR_MED1_TARGETS_UP	-0.00737767	0.316093	-4.68505	0.00296243	0.0123105
LEE_BMP2_TARGETS_DN	-0.00711013	0.29165	-4.6774	0.00298703	0.0124018
OHASHI_AURKA_TARGETS	-0.0118576	0.302983	-4.67148	0.00300622	0.0124705
PID_ERBB1_DOWNSTREAM_PATHWAY	0.00715042	0.339479	4.66681	0.00302148	0.0125229
CHIARADONNA_NEOPLASTIC_TRANSFORMATION_CDC25_DN	0.00984736	0.233104	4.66428	0.00302975	0.0125461
DOANE_RESPONSE_TO_ANDROGEN_UP	0.00716487	0.224577	4.66114	0.00304007	0.0125596
HENDRICKS_SMARCA4_TARGETS_UP	0.00820328	0.283396	4.66113	0.0030401	0.0125596
LEE_CALORIE_RESTRICTION_NEOCORTEX_DN	-0.00705438	0.291299	-4.66086	0.003041	0.0125596
COULOUARN_TEMPORAL_TGFB1_SIGNATURE_DN	0.00662995	0.215806	4.66006	0.00304363	0.0125596
BREDEMEYER_RAG_SIGNALING_VIA_ATM_NOT_VIA_NFKB_DN	0.00656232	0.209762	4.65519	0.00305974	0.0126077
BIDUS_METASTASIS_UP	-0.0120414	0.340107	-4.65493	0.00306061	0.0126077
ZHAN_MULTIPLE_MYELOMA_HP_DN	-0.00843866	0.222156	-4.65164	0.00307156	0.0126418
REACTOME_ANTIVIRAL_MECHANISM_BY_IFN_STIMULATED_GENES	-0.00767985	0.330559	-4.64512	0.00309337	0.0127205
SASSON_RESPONSE_TO_FORSKOLIN_DN	0.0077771	0.258769	4.64274	0.00310138	0.0127346
BIOCARTA_BIOPEPTIDES_PATHWAY	0.0081211	0.288644	4.64233	0.00310276	0.0127346
HOWLIN_PUBERTAL_MAMMARY_GLAND	0.0113677	0.111602	4.6417	0.00310488	0.0127346
BIOCARTA_PML_PATHWAY	-0.0124258	0.232899	-4.63822	0.00311666	0.0127718
LE_SKI_TARGETS_DN	-0.0303707	-0.109106	-4.6343	0.00312997	0.0128153
DAVICIONI_TARGETS_OF_PAX_FOXO1_FUSIONS_UP	0.00677238	0.20366	4.63251	0.00313608	0.0128246
KYNG_RESPONSE_TO_H2O2_VIA_ERCC6_UP	-0.00751212	0.285738	-4.63204	0.00313767	0.0128246
HANN_RESISTANCE_TO_BCL2_INHIBITOR_UP	-0.0112529	0.131282	-4.62661	0.00315627	0.0128804
REACTOME_REGULATION_OF_IFNG_SIGNALING	0.00735541	0.268481	4.62647	0.00315677	0.0128804
VANHARANTA_UTERINE_FIBROID_UP	0.00851842	0.105208	4.62107	0.00317537	0.0129451
SCHAEFFER_PROSTATE_DEVELOPMENT_12HR_UP	0.008591	0.226505	4.61895	0.0031827	0.0129597
BILD_E2F3_ONCOGENIC_SIGNATURE	-0.0076949	0.190002	-4.61779	0.00318674	0.0129597
REACTOME_ADP_SIGNALLING_THROUGH_P2RY1	0.00981445	0.185622	4.61767	0.00318717	0.0129597
CHAN_INTERFERON_PRODUCING_DENDRITIC_CELL	0.0300613	-0.265613	4.60931	0.00321636	0.0130672
CAFFAREL_RESPONSE_TO_THC_DN	-0.0121332	0.333442	-4.60511	0.00323111	0.0131158
WU_HBX_TARGETS_2_UP	0.0144	0.318318	4.60399	0.00323507	0.0131206
BIOCARTA_RANMS_PATHWAY	-0.00820567	0.452409	-4.59656	0.00326144	0.0132162
VALK_AML_WITH_FLT3_ITD	-0.0118314	0.187681	-4.59383	0.00327118	0.0132444
ST_FAS_SIGNALING_PATHWAY	-0.00733547	0.261054	-4.59287	0.00327464	0.013247
KEGG_PRIMARY_BILE_ACID_BIOSYNTHESIS	0.0217049	0.0475099	4.59113	0.00328086	0.0132608
LEE_LIVER_CANCER_E2F1_UP	0.0123759	0.232765	4.58836	0.00329081	0.0132897
HOSHIDA_LIVER_CANCER_LATE_RECURRENCE_DN	0.0103935	0.175983	4.58579	0.0033001	0.0133078
KRIEG_HYPOXIA_VIA_KDM3A	0.00779296	0.209327	4.58519	0.00330227	0.0133078
MCBRYAN_PUBERTAL_BREAST_4_5WK_UP	0.00763014	0.246546	4.58408	0.00330628	0.0133078
BIOCARTA_CASPASE_PATHWAY	0.0104675	0.26493	4.58197	0.00331393	0.0133078
REACTOME_M_G1_TRANSITION	-0.0142228	0.324258	-4.58177	0.00331465	0.0133078
HARRIS_BRAIN_CANCER_PROGENITORS	0.0149799	0.0993002	4.58137	0.00331611	0.0133078
SEKI_INFLAMMATORY_RESPONSE_LPS_UP	0.00789584	0.139227	4.58097	0.00331755	0.0133078
REACTOME_FGFR4_LIGAND_BINDING_AND_ACTIVATION	-0.0198945	-0.0017655	-4.5809	0.00331781	0.0133078
BIOCARTA_RACCYCD_PATHWAY	-0.0075455	0.332645	-4.57607	0.00333539	0.0133543
REACTOME_UNFOLDED_PROTEIN_RESPONSE	0.00752804	0.33533	4.57552	0.00333742	0.0133543
XU_CREBBP_TARGETS_UP	-0.0171872	0.294176	-4.57521	0.00333856	0.0133543
TURASHVILI_BREAST_LOBULAR_CARCINOMA_VS_LOBULAR_NORMAL_UP	0.00933778	0.193469	4.57463	0.00334068	0.0133543
BIOCARTA_CBL_PATHWAY	0.015358	0.35746	4.56994	0.00335792	0.0134118
GALE_APL_WITH_FLT3_MUTATED_UP	-0.0138704	0.274634	-4.56542	0.0033746	0.0134671
KORKOLA_CHORIOCARCINOMA	-0.0303446	0.0656202	-4.56346	0.00338186	0.0134847
PID_A6B1_A6B4_INTEGRIN_PATHWAY	0.00747922	0.365532	4.55807	0.00340194	0.013542
CHIARADONNA_NEOPLASTIC_TRANSFORMATION_KRAS_UP	-0.00717827	0.278693	-4.55775	0.00340314	0.013542
WAESCH_ANAPHASE_PROMOTING_COMPLEX	-0.00955678	0.275557	-4.55729	0.00340484	0.013542
ZHAN_V2_LATE_DIFFERENTIATION_GENES	-0.0143299	0.306388	-4.55031	0.00343109	0.013635
BURTON_ADIPOGENESIS_9	0.00837936	0.212054	4.54953	0.00343402	0.0136352
REACTOME_NOTCH1_INTRACELLULAR_DOMAIN_REGULATES_TRANSCRIPTION	0.00738254	0.264421	4.54764	0.00344117	0.0136521
MYLLYKANGAS_AMPLIFICATION_HOT_SPOT_12	-0.00908032	0.449406	-4.54509	0.00345082	0.0136789
BROWNE_HCMV_INFECTION_1HR_UP	0.0140822	0.141434	4.53622	0.00348469	0.0138016
SENESE_HDAC1_AND_HDAC2_TARGETS_UP	0.00976566	0.204377	4.53436	0.00349185	0.0138184
BIOCARTA_P27_PATHWAY	-0.0198279	0.285849	-4.53203	0.00350085	0.0138417
FARMER_BREAST_CANCER_CLUSTER_8	-0.0100505	0.32428	-4.53132	0.00350359	0.0138417
SMID_BREAST_CANCER_RELAPSE_IN_BRAIN_DN	0.00893268	0.165741	4.52962	0.00351014	0.0138461
WEBER_METHYLATED_HCP_IN_SPERM_DN	0.0275418	-0.118622	4.52951	0.00351058	0.0138461
REACTOME_CTLA4_INHIBITORY_SIGNALING	-0.0124962	0.28145	-4.52583	0.00352486	0.0138909
PID_THROMBIN_PAR1_PATHWAY	0.0130915	0.296079	4.51948	0.00354962	0.0139768
SHIRAISHI_PLZF_TARGETS_DN	0.0135521	0.135549	4.51784	0.00355605	0.0139861
DUTERTRE_ESTRADIOL_RESPONSE_24HR_DN	0.014773	0.239878	4.51738	0.00355789	0.0139861
KEGG_BETA_ALANINE_METABOLISM	-0.0143307	0.206541	-4.51197	0.00357922	0.0140545
LINDSTEDT_DENDRITIC_CELL_MATURATION_A	0.00744346	0.115822	4.51146	0.00358124	0.0140545
KONDO_EZH2_TARGETS	0.00968549	0.143527	4.50289	0.00361533	0.0141759
SHIPP_DLBCL_CURED_VS_FATAL_UP	0.00852532	-0.0100903	4.50218	0.00361817	0.0141759
BOHN_PRIMARY_IMMUNODEFICIENCY_SYNDROM_DN	0.00914985	0.204209	4.4993	0.00362971	0.0142094
TIEN_INTESTINE_PROBIOTICS_6HR_DN	0.00628237	0.248602	4.49526	0.00364598	0.0142518
GROSS_HYPOXIA_VIA_ELK3_UP	-0.00760665	0.30755	-4.49468	0.00364833	0.0142518
REACTOME_OLFACTORY_SIGNALING_PATHWAY	0.0139865	-0.167201	4.49379	0.00365192	0.0142518
REACTOME_GLUCURONIDATION	-0.0270834	-0.0855598	-4.49341	0.00365349	0.0142518
KEGG_RNA_DEGRADATION	-0.00655807	0.308413	-4.49288	0.00365562	0.0142518
KIM_MYC_AMPLIFICATION_TARGETS_UP	-0.00703362	0.255012	-4.49035	0.0036659	0.0142801
SCHAEFFER_PROSTATE_DEVELOPMENT_AND_CANCER_BOX3	-0.0176161	0.353015	-4.48934	0.00366997	0.0142842
PASQUALUCCI_LYMPHOMA_BY_GC_STAGE_UP	0.00695415	0.271876	4.48447	0.00368985	0.0143497
REACTOME_SIGNAL_ATTENUATION	0.0156199	0.243709	4.48094	0.00370435	0.0143943
REACTOME_SIGNAL_TRANSDUCTION_BY_L1	0.00704441	0.298528	4.47779	0.00371732	0.0144142
REACTOME_PACKAGING_OF_TELOMERE_ENDS	0.0142966	-0.0618305	4.47753	0.00371839	0.0144142
PID_HNF3B_PATHWAY	0.0104918	0.180406	4.47748	0.00371861	0.0144142
YANG_BREAST_CANCER_ESR1_UP	0.00680777	0.236689	4.47599	0.00372475	0.0144261
REACTOME_BIOSYNTHESIS_OF_THE_N_GLYCAN_PRECURSOR_DOLICHOL_LIPID_LINKED_OLIGOSACCHARIDE_LLO_AND_TRANSFER_TO_A_NASCENT_PROTEIN	0.0128787	0.212353	4.4709	0.00374588	0.0144961
CHIN_BREAST_CANCER_COPY_NUMBER_UP	0.0128999	0.361081	4.47012	0.00374913	0.0144968
REACTOME_PHASE_II_CONJUGATION	-0.0114013	0.11889	-4.46888	0.00375429	0.0145049
KREPPEL_CD99_TARGETS_DN	0.0371533	0.267739	4.46649	0.00376428	0.0145317
BASSO_HAIRY_CELL_LEUKEMIA_DN	-0.0118194	0.189931	-4.46542	0.00376873	0.014537
KANG_CISPLATIN_RESISTANCE_DN	0.0121773	0.274286	4.46395	0.00377492	0.014549
WU_SILENCED_BY_METHYLATION_IN_BLADDER_CANCER	0.0135731	0.073054	4.46209	0.00378273	0.0145672
KORKOLA_YOLK_SAC_TUMOR	0.00886347	0.0432979	4.45569	0.00380979	0.0146529
BIOCARTA_EGFR_SMRTE_PATHWAY	0.0160328	0.327395	4.45536	0.00381117	0.0146529
REACTOME_GLUTATHIONE_CONJUGATION	-0.0218368	0.200638	-4.44788	0.00384308	0.0147635
BROWNE_HCMV_INFECTION_24HR_UP	-0.00617892	0.22542	-4.44314	0.00386341	0.0148296
BIOCARTA_VEGF_PATHWAY	-0.00915964	0.330971	-4.43997	0.0038771	0.0148626
SHAFFER_IRF4_TARGETS_IN_PLASMA_CELL_VS_MATURE_B_LYMPHOCYTE	0.00803279	0.268831	4.43969	0.00387831	0.0148626
PID_ECADHERIN_NASCENT_AJ_PATHWAY	0.00787879	0.385465	4.43782	0.00388642	0.0148817
SA_MMP_CYTOKINE_CONNECTION	-0.00800778	0.00738655	-4.43609	0.00389396	0.014888
CHIARADONNA_NEOPLASTIC_TRANSFORMATION_KRAS_DN	0.00787519	0.200594	4.43599	0.00389436	0.014888
MIKKELSEN_PLURIPOTENT_STATE_UP	-0.0170753	0.205597	-4.43346	0.00390539	0.0149181
WANG_TUMOR_INVASIVENESS_DN	-0.00627377	0.340306	-4.4289	0.00392532	0.0149725
MATTHEWS_SKIN_CARCINOGENESIS_VIA_JUN	0.0242998	0.156766	4.42876	0.00392596	0.0149725
REACTOME_METABOLISM_OF_CARBOHYDRATES	-0.00758983	0.235231	-4.42803	0.00392913	0.0149725
DURAND_STROMA_NS_UP	0.00757208	0.158561	4.42523	0.00394146	0.0150074
DIRMEIER_LMP1_RESPONSE_LATE_UP	-0.0086893	0.28918	-4.42324	0.00395022	0.015011
TARTE_PLASMA_CELL_VS_B_LYMPHOCYTE_DN	-0.0111603	0.17644	-4.42238	0.00395402	0.015011
ZHAN_MULTIPLE_MYELOMA_SUBGROUPS	-0.0103292	0.34227	-4.42217	0.00395498	0.015011
SOTIRIOU_BREAST_CANCER_GRADE_1_VS_3_DN	-0.014868	0.240373	-4.42171	0.00395701	0.015011
PYEON_CANCER_HEAD_AND_NECK_VS_CERVICAL_DN	0.0288917	-0.232079	4.42142	0.00395827	0.015011
KAAB_HEART_ATRIUM_VS_VENTRICLE_UP	0.00852719	0.183553	4.41841	0.00397163	0.0150376
WONG_ADULT_TISSUE_STEM_MODULE	0.00634029	0.175067	4.41841	0.00397165	0.0150376
BIOCARTA_SPPA_PATHWAY	0.00869168	0.328478	4.41434	0.00398979	0.0150924
KEGG_DRUG_METABOLISM_CYTOCHROME_P450	-0.00776232	0.00565818	-4.41373	0.00399251	0.0150924
KYNG_ENVIRONMENTAL_STRESS_RESPONSE_NOT_BY_4NQO_IN_OLD	-0.00895156	0.372555	-4.40899	0.00401377	0.0151516
PHESSE_TARGETS_OF_APC_AND_MBD2_UP	-0.0123348	0.0412806	-4.40835	0.00401664	0.0151516
NEMETH_INFLAMMATORY_RESPONSE_LPS_UP	0.00796779	0.252589	4.40796	0.00401836	0.0151516
SCHAEFFER_PROSTATE_DEVELOPMENT_48HR_UP	0.00908616	0.202842	4.40656	0.00402468	0.0151516
BHAT_ESR1_TARGETS_NOT_VIA_AKT1_DN	0.0177994	0.230754	4.40621	0.00402628	0.0151516
REACTOME_PPARA_ACTIVATES_GENE_EXPRESSION	0.01095	0.240504	4.40596	0.0040274	0.0151516
BROWNE_HCMV_INFECTION_10HR_UP	0.0117209	0.197782	4.40525	0.0040306	0.0151516
KEGG_ALDOSTERONE_REGULATED_SODIUM_REABSORPTION	0.0119428	0.225412	4.40363	0.00403793	0.0151671
REN_ALVEOLAR_RHABDOMYOSARCOMA_DN	0.00921519	0.292477	4.39895	0.00405915	0.0152347
KEGG_PANCREATIC_CANCER	-0.0087077	0.277238	-4.39509	0.0040768	0.0152888
GROSS_HYPOXIA_VIA_ELK3_DN	0.0105638	0.231414	4.3779	0.0041563	0.0155746
BIOCARTA_BCELLSURVIVAL_PATHWAY	0.012635	0.326627	4.36913	0.00419753	0.0157166
KAN_RESPONSE_TO_ARSENIC_TRIOXIDE	0.00746393	0.181133	4.36662	0.0042094	0.0157486
GROSS_HYPOXIA_VIA_HIF1A_DN	0.00700331	0.22995	4.36474	0.00421832	0.015762
ZHAN_MULTIPLE_MYELOMA_MS_DN	-0.00661725	0.301526	-4.36446	0.00421965	0.015762
LEE_LIVER_CANCER_ACOX1_UP	0.0108687	0.253144	4.36247	0.00422913	0.015785
BIOCARTA_TCR_PATHWAY	-0.00725544	0.260902	-4.36162	0.00423317	0.0157876
KEGG_CYSTEINE_AND_METHIONINE_METABOLISM	-0.00821233	0.233886	-4.35878	0.00424675	0.0158257
CAIRO_HEPATOBLASTOMA_POOR_SURVIVAL	-0.0145088	0.190708	-4.35295	0.00427477	0.0159176
BIOCARTA_NKCELLS_PATHWAY	0.0106782	0.221588	4.34866	0.00429554	0.0159722
KEGG_SULFUR_METABOLISM	0.0120214	0.126802	4.34853	0.00429618	0.0159722
REACTOME_METABOLISM_OF_NUCLEOTIDES	-0.00996403	0.254314	-4.3474	0.00430164	0.0159752
ROESSLER_LIVER_CANCER_METASTASIS_UP	-0.0093934	0.218821	-4.34654	0.00430585	0.0159752
BRUINS_UVC_RESPONSE_VIA_TP53_GROUP_C	0.00832719	0.172544	4.34579	0.00430946	0.0159752
RUIZ_TNC_TARGETS_UP	0.00995775	0.232367	4.3455	0.00431091	0.0159752
MIKKELSEN_IPS_LCP_WITH_H3K4ME3_AND_H3K27ME3	0.0239573	0.034733	4.34422	0.00431712	0.0159752
HUPER_BREAST_BASAL_VS_LUMINAL_UP	0.0109968	0.115099	4.34419	0.00431726	0.0159752
CASTELLANO_HRAS_AND_NRAS_TARGETS_DN	-0.0150641	0.0859504	-4.33151	0.00437962	0.0161849
XU_HGF_TARGETS_INDUCED_BY_AKT1_48HR_DN	-0.0190672	0.277037	-4.33112	0.00438153	0.0161849
REACTOME_SEMA3A_PAK_DEPENDENT_AXON_REPULSION	0.0103866	0.377677	4.33011	0.00438658	0.0161849
HESS_TARGETS_OF_HOXA9_AND_MEIS1_DN	0.00843144	0.146377	4.3298	0.00438811	0.0161849
REACTOME_PROCESSING_OF_CAPPED_INTRONLESS_PRE_MRNA	-0.0100766	0.342792	-4.32921	0.00439104	0.0161849
KANG_AR_TARGETS_DN	-0.0108699	0.200973	-4.3256	0.00440904	0.0162272
PAPASPYRIDONOS_UNSTABLE_ATEROSCLEROTIC_PLAQUE_UP	0.00885109	0.269022	4.32513	0.00441136	0.0162272
TAKEDA_TARGETS_OF_NUP98_HOXA9_FUSION_6HR_UP	0.0114443	0.141642	4.32406	0.00441669	0.0162272
REACTOME_CS_DS_DEGRADATION	-0.0141965	0.181516	-4.32359	0.00441907	0.0162272
REICHERT_MITOSIS_LIN9_TARGETS	-0.0203295	0.337091	-4.32347	0.00441967	0.0162272
HEIDENBLAD_AMPLIFIED_IN_PANCREATIC_CANCER	0.0095197	0.313727	4.31951	0.00443953	0.0162875
MOREAUX_MULTIPLE_MYELOMA_BY_TACI_DN	-0.00602365	0.316646	-4.31775	0.0044484	0.0163073
STEGMEIER_PRE-MITOTIC_CELL_CYCLE_REGULATORS	-0.0198456	0.179163	-4.31586	0.00445797	0.0163298
MIKKELSEN_MCV6_ICP_WITH_H3K27ME3	-0.00907008	-0.102955	-4.3087	0.00449432	0.0164502
CAFFAREL_RESPONSE_TO_THC_UP	0.00930032	0.353574	4.30582	0.00450905	0.0164913
ZHANG_TLX_TARGETS_36HR_DN	-0.0216567	0.315001	-4.3046	0.00451531	0.0165015
KORKOLA_CHORIOCARCINOMA_DN	0.0386745	-0.0932855	4.30166	0.00453037	0.0165437
KAPOSI_LIVER_CANCER_MET_DN	-0.00995734	0.300858	-4.29488	0.00456541	0.0166588
OUYANG_PROSTATE_CANCER_MARKERS	0.0157238	0.169889	4.28763	0.00460326	0.016784
CHYLA_CBFA2T3_TARGETS_UP	0.00619497	0.138294	4.27544	0.00466763	0.0170056
MURAKAMI_UV_RESPONSE_24HR	0.0169646	0.154071	4.2713	0.0046897	0.0170622
WEBER_METHYLATED_LCP_IN_FIBROBLAST_DN	0.0275751	-0.064295	4.27117	0.0046904	0.0170622
DITTMER_PTHLH_TARGETS_UP	-0.00702546	0.329165	-4.26838	0.00470534	0.0171034
SU_TESTIS	-0.0154569	0.198518	-4.26578	0.00471935	0.0171412
REACTOME_CYTOCHROME_P450_ARRANGED_BY_SUBSTRATE_TYPE	0.0176908	-0.0649623	4.26309	0.00473386	0.0171807
REACTOME_DESTABILIZATION_OF_MRNA_BY_BRF1	-0.00874315	0.296862	-4.26058	0.00474746	0.0172168
NIELSEN_GIST_AND_SYNOVIAL_SARCOMA_DN	0.0198307	-0.0359741	4.25781	0.00476247	0.017258
TAVOR_CEBPA_TARGETS_UP	0.00890336	0.194082	4.25617	0.00477141	0.0172772
AMIT_EGF_RESPONSE_120_MCF10A	0.00918707	0.252631	4.25383	0.00478417	0.0173101
TURASHVILI_BREAST_DUCTAL_CARCINOMA_VS_LOBULAR_NORMAL_DN	0.0139165	0.0576891	4.25082	0.00480068	0.0173477
WANG_NEOPLASTIC_TRANSFORMATION_BY_CCND1_MYC	0.0163036	0.0793787	4.2506	0.0048019	0.0173477
DUTERTRE_ESTRADIOL_RESPONSE_6HR_UP	-0.00728599	0.240676	-4.24983	0.00480611	0.0173497
JEON_SMAD6_TARGETS_DN	-0.0101673	0.305563	-4.24703	0.00482154	0.0173921
TURASHVILI_BREAST_LOBULAR_CARCINOMA_VS_DUCTAL_NORMAL_DN	0.0138916	0.159883	4.24364	0.00484031	0.0174465
MODY_HIPPOCAMPUS_PRENATAL	-0.0109882	0.395002	-4.24165	0.00485134	0.017473
CHESLER_BRAIN_D6MIT150_QTL_TRANS	0.0182617	0.101798	4.24001	0.00486043	0.0174924
XU_CREBBP_TARGETS_DN	0.00941175	0.270544	4.23392	0.00489446	0.0176014
ONGUSAHA_BRCA1_TARGETS_DN	0.0208438	0.368287	4.23325	0.00489826	0.0176017
BIOCARTA_DNAFRAGMENT_PATHWAY	-0.00711802	0.279185	-4.23217	0.0049043	0.01761
WENG_POR_TARGETS_LIVER_UP	0.010162	0.204821	4.22597	0.00493931	0.0177223
KEGG_VIBRIO_CHOLERAE_INFECTION	0.010577	0.30189	4.22527	0.00494328	0.0177231
ZHAN_EARLY_DIFFERENTIATION_GENES_UP	0.0128732	0.310788	4.22174	0.00496336	0.0177816
TESAR_ALK_TARGETS_HUMAN_ES_5D_UP	-0.0473776	-0.206229	-4.21878	0.00498026	0.0177994
KEGG_PENTOSE_PHOSPHATE_PATHWAY	-0.00972093	0.320825	-4.21831	0.00498294	0.0177994
REACTOME_BINDING_AND_ENTRY_OF_HIV_VIRION	-0.0288547	0.240291	-4.21827	0.00498315	0.0177994
LIU_IL13_PRIMING_MODEL	0.0161308	0.168568	4.21823	0.00498339	0.0177994
REACTOME_REGULATORY_RNA_PATHWAYS	-0.0102424	0.346322	-4.21443	0.0050052	0.0178638
NEMETH_INFLAMMATORY_RESPONSE_LPS_DN	-0.00923901	0.280348	-4.21345	0.00501081	0.0178704
MORI_LARGE_PRE_BII_LYMPHOCYTE_DN	-0.00703959	0.201599	-4.20484	0.00506067	0.0180275
MARIADASON_RESPONSE_TO_BUTYRATE_CURCUMIN_SULINDAC_TSA_2	-0.0234507	0.288804	-4.20453	0.0050625	0.0180275
PID_INTEGRIN_A9B1_PATHWAY	-0.00659988	0.201339	-4.19626	0.00511092	0.0181862
REACTOME_INTRINSIC_PATHWAY	-0.0126624	-0.0394479	-4.19422	0.00512294	0.0182153
ZHANG_RESPONSE_TO_IKK_INHIBITOR_AND_TNF_UP	0.00850857	0.166674	4.19071	0.00514371	0.0182554
PID_AJDISS_2PATHWAY	0.00793083	0.356303	4.19043	0.00514534	0.0182554
GENTILE_UV_RESPONSE_CLUSTER_D6	0.00968336	0.316099	4.19036	0.0051458	0.0182554
MASRI_RESISTANCE_TO_TAMOXIFEN_AND_AROMATASE_INHIBITORS_DN	0.0130736	0.131556	4.1874	0.00516337	0.018304
YANG_BREAST_CANCER_ESR1_BULK_DN	-0.00901514	0.219544	-4.18616	0.00517075	0.0183165
RIZ_ERYTHROID_DIFFERENTIATION_6HR	0.0154842	0.153372	4.18312	0.00518893	0.0183631
ZHANG_BREAST_CANCER_PROGENITORS_UP	-0.0116664	0.305416	-4.18266	0.00519168	0.0183631
GRAESSMANN_RESPONSE_TO_MC_AND_DOXORUBICIN_DN	-0.00580929	0.290586	-4.17846	0.00521691	0.0184385
TSUNODA_CISPLATIN_RESISTANCE_DN	0.0100643	0.190924	4.17655	0.0052284	0.0184654
PID_ERBB_NETWORK_PATHWAY	0.0154541	0.251955	4.17488	0.00523851	0.0184838
HU_ANGIOGENESIS_UP	0.00697654	0.289902	4.17402	0.00524372	0.0184838
MEISSNER_NPC_HCP_WITH_H3K4ME3_AND_H3K27ME3	-0.00831287	0.0948418	-4.17375	0.00524535	0.0184838
GENTILE_UV_RESPONSE_CLUSTER_D4	0.0114516	0.3425	4.17132	0.00526012	0.018522
NIKOLSKY_BREAST_CANCER_19Q13.1_AMPLICON	0.0173228	-0.155723	4.16721	0.00528515	0.0185963
HAN_JNK_SINGALING_DN	0.0116562	0.133314	4.16588	0.0052933	0.0186112
GROSS_HYPOXIA_VIA_HIF1A_ONLY	0.017339	0.215134	4.16036	0.00532723	0.018716
TSAI_RESPONSE_TO_IONIZING_RADIATION	-0.0063683	0.226962	-4.15974	0.00533104	0.018716
DASU_IL6_SIGNALING_DN	-0.0110221	0.383901	-4.15752	0.00534474	0.0187502
ROSS_AML_WITH_AML1_ETO_FUSION	0.00836349	0.159964	4.15661	0.00535036	0.018756
KEGG_SELENOAMINO_ACID_METABOLISM	-0.00831793	0.230022	-4.15489	0.00536106	0.0187796
DURAND_STROMA_S_UP	0.00657153	0.0900941	4.15301	0.0053727	0.0188064
TURASHVILI_BREAST_DUCTAL_CARCINOMA_VS_DUCTAL_NORMAL_DN	0.0128824	0.123899	4.15198	0.00537912	0.0188084
GARGALOVIC_RESPONSE_TO_OXIDIZED_PHOSPHOLIPIDS_GREEN_UP	0.0176687	0.204825	4.15165	0.00538122	0.0188084
PID_NFAT_TFPATHWAY	0.0113712	0.142527	4.14623	0.00541513	0.0188999
BIOCARTA_MTOR_PATHWAY	-0.00897133	0.381961	-4.14619	0.00541537	0.0188999
KYNG_ENVIRONMENTAL_STRESS_RESPONSE_NOT_BY_UV_IN_OLD	0.0102646	0.318906	4.145	0.00542282	0.0189119
DOANE_BREAST_CANCER_ESR1_DN	0.00857545	0.121766	4.14318	0.00543429	0.0189379
BIOCARTA_KREB_PATHWAY	0.0104572	0.418393	4.14058	0.0054507	0.0189811
CASTELLANO_NRAS_TARGETS_DN	0.0183891	0.171954	4.1391	0.0054601	0.0189999
KEGG_PRIMARY_IMMUNODEFICIENCY	-0.0229344	-0.0159321	-4.13827	0.00546531	0.019004
FONTAINE_FOLLICULAR_THYROID_ADENOMA_UP	0.00631576	0.255682	4.13565	0.00548197	0.0190479
NOUZOVA_METHYLATED_IN_APL	0.00620729	0.0961406	4.13278	0.00550031	0.0190976
MYLLYKANGAS_AMPLIFICATION_HOT_SPOT_13	-0.0128447	0.136369	-4.12985	0.00551904	0.0191486
POMEROY_MEDULLOBLASTOMA_PROGNOSIS_DN	-0.00763487	0.419784	-4.12485	0.00555121	0.0192461
LIN_TUMOR_ESCAPE_FROM_IMMUNE_ATTACK	0.0211195	0.0351172	4.1228	0.00556443	0.0192778
KEGG_GNRH_SIGNALING_PATHWAY	0.00857285	0.218615	4.11927	0.00558733	0.019343
REACTOME_DIGESTION_OF_DIETARY_CARBOHYDRATE	0.0785066	-0.230436	4.11563	0.00561106	0.0194109
REACTOME_SYNTHESIS_SECRETION_AND_INACTIVATION_OF_GIP	0.0226648	0.218775	4.10915	0.00565356	0.0195436
MIDORIKAWA_AMPLIFIED_IN_LIVER_CANCER	0.00596241	0.298515	4.10707	0.00566724	0.0195766
ZHAN_MULTIPLE_MYELOMA_SPIKED	0.0172631	0.14273	4.10645	0.00567137	0.0195766
LIU_TARGETS_OF_VMYB_VS_CMYB_UP	0.0134223	0.210152	4.10384	0.00568867	0.019622
REN_ALVEOLAR_RHABDOMYOSARCOMA_UP	0.00932275	0.12823	4.10229	0.00569894	0.0196331
ST_TYPE_I_INTERFERON_PATHWAY	-0.0134684	0.235528	-4.1021	0.0057002	0.0196331
ZEMBUTSU_SENSITIVITY_TO_VINBLASTINE	0.00972479	0.337675	4.0999	0.00571482	0.0196691
TARTE_PLASMA_CELL_VS_PLASMABLAST_DN	-0.0076997	0.337545	-4.09733	0.00573197	0.0197138
JOHNSTONE_PARVB_TARGETS_3_DN	-0.00993384	0.286342	-4.09653	0.00573735	0.019718
MATTIOLI_MULTIPLE_MYELOMA_SUBGROUPS	-0.0084353	0.300395	-4.09511	0.00574686	0.0197351
WANG_IMMORTALIZED_BY_HOXA9_AND_MEIS1_UP	0.00887006	0.173253	4.09454	0.00575069	0.0197351
REACTOME_CREB_PHOSPHORYLATION_THROUGH_THE_ACTIVATION_OF_CAMKII	0.00642554	0.25652	4.09093	0.00577497	0.0197973
REACTOME_FACTORS_INVOLVED_IN_MEGAKARYOCYTE_DEVELOPMENT_AND_PLATELET_PRODUCTION	-0.00578183	0.233463	-4.0906	0.00577718	0.0197973
VERHAAK_GLIOBLASTOMA_MESENCHYMAL	0.00725246	0.204323	4.08915	0.00578699	0.0198166
KEGG_GLYCOLYSIS_GLUCONEOGENESIS	-0.0110572	0.282094	-4.08607	0.00580783	0.0198598
NABA_MATRISOME	0.00701747	0.0132016	4.08605	0.005808	0.0198598
REACTOME_BASE_EXCISION_REPAIR	-0.0181444	0.284448	-4.08374	0.00582372	0.0198991
HOQUE_METHYLATED_IN_CANCER	0.0109166	0.0484214	4.08298	0.0058289	0.0199024
TAKEDA_TARGETS_OF_NUP98_HOXA9_FUSION_8D_DN	0.00984273	0.151669	4.07154	0.0059074	0.0201452
BOYAULT_LIVER_CANCER_SUBCLASS_G56_UP	0.00776973	0.170945	4.071	0.0059111	0.0201452
GENTILE_UV_HIGH_DOSE_UP	0.00674549	0.157581	4.07076	0.00591278	0.0201452
REACTOME_ACYL_CHAIN_REMODELLING_OF_PI	0.0124788	0.0915258	4.06924	0.00592334	0.0201667
CHOW_RASSF1_TARGETS_UP	-0.00605103	0.297182	-4.0674	0.00593609	0.0201838
BECKER_TAMOXIFEN_RESISTANCE_UP	0.0155751	0.229263	4.06728	0.00593691	0.0201838
NIKOLSKY_BREAST_CANCER_10Q22_AMPLICON	0.0116608	0.366995	4.06561	0.00594858	0.0201969
KIM_WT1_TARGETS_12HR_UP	0.00832873	0.218266	4.06438	0.00595716	0.0201969
MOSERLE_IFNA_RESPONSE	0.0204504	0.0425545	4.06432	0.00595759	0.0201969
CAIRO_PML_TARGETS_BOUND_BY_MYC_DN	0.0168515	0.219098	4.06428	0.00595784	0.0201969
PID_RAC1_REG_PATHWAY	0.0116984	0.228162	4.05914	0.00599382	0.020295
REACTOME_DEGRADATION_OF_THE_EXTRACELLULAR_MATRIX	0.0159857	0.0421453	4.05892	0.00599537	0.020295
BROWNE_HCMV_INFECTION_6HR_UP	0.0107342	0.21441	4.05164	0.00604683	0.0204545
BIOCARTA_FREE_PATHWAY	-0.00968511	0.277893	-4.05044	0.00605532	0.0204686
GOTZMANN_EPITHELIAL_TO_MESENCHYMAL_TRANSITION_DN	0.00806345	0.294299	4.04889	0.00606633	0.0204912
THEILGAARD_NEUTROPHIL_AT_SKIN_WOUND_UP	0.00718879	0.290391	4.04499	0.00609424	0.0205708
KUROZUMI_RESPONSE_TO_ONCOCYTIC_VIRUS	-0.0149713	-0.15456	-4.04388	0.00610219	0.0205829
SCHRAMM_INHBA_TARGETS_DN	-0.0163458	0.275367	-4.04281	0.00610987	0.0205941
YOSHIOKA_LIVER_CANCER_EARLY_RECURRENCE_DN	0.00964336	0.221676	4.04076	0.00612459	0.020629
DAUER_STAT3_TARGETS_DN	0.0167133	0.200467	4.0376	0.00614737	0.020691
LIM_MAMMARY_LUMINAL_MATURE_DN	0.00693119	0.061644	4.02565	0.00623441	0.0209691
DELYS_THYROID_CANCER_DN	0.00762173	0.0722169	4.02115	0.00626757	0.0210656
GALIE_TUMOR_ANGIOGENESIS	0.0204346	0.0127485	4.01733	0.00629584	0.0211126
GROSS_HIF1A_TARGETS_DN	0.00890681	0.267167	4.01717	0.00629701	0.0211126
SANSOM_APC_TARGETS_REQUIRE_MYC	-0.0114752	0.23886	-4.01717	0.00629702	0.0211126
ST_G_ALPHA_I_PATHWAY	0.0135832	0.217863	4.01685	0.00629942	0.0211126
ZHOU_PANCREATIC_BETA_CELL	0.0116422	0.156305	4.01343	0.00632486	0.0211771
MIKKELSEN_MEF_HCP_WITH_H3K27ME3	0.0087749	-0.0328031	4.01306	0.00632761	0.0211771
REACTOME_PROCESSING_OF_CAPPED_INTRON_CONTAINING_PRE_MRNA	-0.00950057	0.395286	-4.00954	0.00635396	0.0212503
REACTOME_N_GLYCAN_TRIMMING_IN_THE_ER_AND_CALNEXIN_CALRETICULIN_CYCLE	0.00740986	0.428739	4.00457	0.00639134	0.0213602
VISALA_AGING_LYMPHOCYTE_UP	0.0270423	0.259841	4.00228	0.00640863	0.0214028
KEGG_DILATED_CARDIOMYOPATHY	0.00834584	0.163762	4.00045	0.00642251	0.0214197
REACTOME_TRANSPORT_OF_ORGANIC_ANIONS	0.0193233	-0.0360668	4.00042	0.00642275	0.0214197
VERRECCHIA_RESPONSE_TO_TGFB1_C6	-0.022156	0.331547	-3.99484	0.00646527	0.021535
BIOCARTA_EDG1_PATHWAY	0.00855318	0.29694	3.99468	0.00646643	0.021535
DORSAM_HOXA9_TARGETS_DN	0.00630915	0.347624	3.9919	0.00648775	0.0215908
HOFFMANN_PRE_BI_TO_LARGE_PRE_BII_LYMPHOCYTE_DN	0.00891588	0.256153	3.99012	0.00650146	0.0216212
BURTON_ADIPOGENESIS_1	0.00995571	0.264194	3.98941	0.00650693	0.0216242
DANG_MYC_TARGETS_DN	-0.00755837	0.276848	-3.98571	0.00653542	0.0217036
BAKER_HEMATOPOESIS_STAT5_TARGETS	0.0195022	0.216825	3.98463	0.0065438	0.0217162
PID_HNF3A_PATHWAY	0.00956146	0.248871	3.98163	0.00656708	0.0217775
PEDERSEN_METASTASIS_BY_ERBB2_ISOFORM_1	0.0170646	0.197478	3.98083	0.00657334	0.0217775
YAUCH_HEDGEHOG_SIGNALING_PARACRINE_DN	0.00802847	0.0779866	3.97951	0.00658363	0.0217775
YAUCH_HEDGEHOG_SIGNALING_PARACRINE_UP	0.0106608	0.113651	3.97933	0.00658503	0.0217775
KEGG_PATHOGENIC_ESCHERICHIA_COLI_INFECTION	0.00666048	0.280862	3.9793	0.00658529	0.0217775
PID_IL2_PI3K_PATHWAY	-0.0127931	0.270231	-3.97796	0.00659572	0.0217968
WANG_CLIM2_TARGETS_DN	0.00704468	0.287238	3.97319	0.00663311	0.021905
FRIDMAN_SENESCENCE_UP	0.00864166	0.23766	3.97152	0.00664622	0.021933
BIOCARTA_TALL1_PATHWAY	-0.0150529	0.190802	-3.97071	0.00665263	0.0219388
CHOI_ATL_CHRONIC_VS_ACUTE_DN	-0.0125272	0.386748	-3.96696	0.0066823	0.0220173
SMID_BREAST_CANCER_RELAPSE_IN_LIVER_DN	0.0226406	0.0312662	3.96653	0.00668574	0.0220173
FLECHNER_BIOPSY_KIDNEY_TRANSPLANT_OK_VS_DONOR_DN	-0.00610952	0.318484	-3.96533	0.00669523	0.0220332
OLSSON_E2F3_TARGETS_UP	0.00763952	0.348347	3.95596	0.00677015	0.0222643
CHANG_CORE_SERUM_RESPONSE_UP	-0.0105169	0.293234	-3.95455	0.00678149	0.0222861
REACTOME_GOLGI_ASSOCIATED_VESICLE_BIOGENESIS	0.00556594	0.349791	3.95288	0.00679499	0.022315
TURASHVILI_BREAST_DUCTAL_CARCINOMA_VS_DUCTAL_NORMAL_UP	0.0093115	0.155038	3.95074	0.00681225	0.0223442
PUIFFE_INVASION_INHIBITED_BY_ASCITES_UP	-0.00609175	0.309319	-3.95007	0.00681773	0.0223442
BUYTAERT_PHOTODYNAMIC_THERAPY_STRESS_DN	-0.0086317	0.230081	-3.95002	0.00681809	0.0223442
MYLLYKANGAS_AMPLIFICATION_HOT_SPOT_11	0.00762463	0.456389	3.94859	0.00682972	0.0223669
PID_FRA_PATHWAY	0.00691212	0.216801	3.94689	0.00684352	0.0223966
PID_RETINOIC_ACID_PATHWAY	0.0118115	0.320383	3.9448	0.00686061	0.0224143
REACTOME_G1_PHASE	-0.00844435	0.305728	-3.94417	0.00686574	0.0224143
REACTOME_HDL_MEDIATED_LIPID_TRANSPORT	-0.00839788	0.0445958	-3.9441	0.00686633	0.0224143
MORI_MATURE_B_LYMPHOCYTE_DN	-0.0108173	0.30365	-3.9439	0.00686791	0.0224143
REACTOME_LOSS_OF_NLP_FROM_MITOTIC_CENTROSOMES	-0.0101191	0.320969	-3.94231	0.00688093	0.0224413
SENGUPTA_EBNA1_ANTICORRELATED	0.00796423	0.160416	3.93926	0.00690602	0.0225076
MADAN_DPPA4_TARGETS	0.012728	0.0777915	3.93827	0.00691415	0.0225097
RASHI_RESPONSE_TO_IONIZING_RADIATION_1	0.0110293	0.243778	3.93802	0.00691618	0.0225097
KOBAYASHI_RESPONSE_TO_ROMIDEPSIN	0.0175476	0.125034	3.93171	0.0069684	0.0226641
TOMIDA_LUNG_CANCER_POOR_SURVIVAL	-0.0283395	0.185588	-3.9311	0.00697349	0.022665
NIELSEN_MALIGNAT_FIBROUS_HISTIOCYTOMA_DN	-0.015316	0.167066	-3.92928	0.00698857	0.0226865
GERHOLD_RESPONSE_TO_TZD_UP	0.0106712	0.261696	3.92915	0.00698968	0.0226865
REACTOME_GLYCOLYSIS	-0.0130956	0.334379	-3.92747	0.00700368	0.0227163
CHIANG_LIVER_CANCER_SUBCLASS_CTNNB1_UP	0.00609607	0.069012	3.92424	0.00703075	0.0227885
PID_INSULIN_GLUCOSE_PATHWAY	0.00609395	0.337586	3.923	0.00704118	0.0228067
REACTOME_VEGF_LIGAND_RECEPTOR_INTERACTIONS	-0.0177978	0.0782711	-3.92015	0.00706513	0.022856
REACTOME_FORMATION_OF_FIBRIN_CLOT_CLOTTING_CASCADE	-0.008648	0.0170111	-3.92004	0.00706608	0.022856
FIGUEROA_AML_METHYLATION_CLUSTER_6_DN	0.0150571	0.110564	3.91839	0.00707997	0.0228799
REACTOME_DEADENYLATION_DEPENDENT_MRNA_DECAY	-0.00598346	0.304876	-3.91783	0.00708472	0.0228799
TURASHVILI_BREAST_CARCINOMA_DUCTAL_VS_LOBULAR_DN	0.0342815	0.15501	3.91744	0.00708799	0.0228799
PID_AMB2_NEUTROPHILS_PATHWAY	-0.0068757	0.168396	-3.91684	0.00709312	0.0228809
SHETH_LIVER_CANCER_VS_TXNIP_LOSS_PAM6	-0.00699892	0.182302	-3.91578	0.00710208	0.0228942
PID_P38_GAMMA_DELTA_PATHWAY	-0.0105878	0.268072	-3.91441	0.00711371	0.022916
BIOCARTA_CDC42RAC_PATHWAY	0.00771582	0.43495	3.91383	0.00711862	0.0229163
HOFMANN_MYELODYSPLASTIC_SYNDROM_RISK_DN	0.00929042	0.0935172	3.90985	0.0071526	0.02301
BERENJENO_ROCK_SIGNALING_NOT_VIA_RHOA_DN	0.0111403	0.298145	3.90726	0.00717477	0.0230656
WANG_RESPONSE_TO_ANDROGEN_UP	0.0102517	0.270591	3.90544	0.00719036	0.0230882
REACTOME_CHYLOMICRON_MEDIATED_LIPID_TRANSPORT	0.0248258	0.241221	3.9053	0.00719158	0.0230882
SAENZ_DETOX_PATHWAY_AND_CARCINOGENESIS_DN	0.0162771	0.0780953	3.90472	0.00719662	0.0230888
BILD_HRAS_ONCOGENIC_SIGNATURE	0.00953395	0.234954	3.89838	0.00725141	0.0232362
REACTOME_BILE_ACID_AND_BILE_SALT_METABOLISM	0.0182068	0.0237872	3.89791	0.00725544	0.0232362
REACTOME_FACILITATIVE_NA_INDEPENDENT_GLUCOSE_TRANSPORTERS	0.00961375	0.00871211	3.8977	0.00725734	0.0232362
SHIPP_DLBCL_VS_FOLLICULAR_LYMPHOMA_UP	-0.0108109	0.387298	-3.89692	0.00726409	0.0232422
KEGG_GLUTATHIONE_METABOLISM	-0.0148128	0.260521	-3.89206	0.00730648	0.023362
REACTOME_REGULATION_OF_RHEB_GTPASE_ACTIVITY_BY_AMPK	-0.00686992	0.297046	-3.88858	0.00733704	0.0234438
GAJATE_RESPONSE_TO_TRABECTEDIN_UP	0.008108	0.215513	3.88454	0.00737261	0.0235187
STOSSI_RESPONSE_TO_ESTRADIOL	0.00895118	0.0798905	3.8843	0.00737478	0.0235187
JOHANSSON_GLIOMAGENESIS_BY_PDGFB_UP	-0.00653171	0.347187	-3.88399	0.00737751	0.0235187
BROWNE_HCMV_INFECTION_48HR_UP	-0.00612112	0.193889	-3.88367	0.00738035	0.0235187
IRITANI_MAD1_TARGETS_DN	-0.0122562	0.398146	-3.88171	0.00739771	0.0235581
SCHLOSSER_SERUM_RESPONSE_UP	0.00625802	0.271908	3.87609	0.00744775	0.0237015
BIOCARTA_CDK5_PATHWAY	0.0158839	0.282904	3.87359	0.00747016	0.0237568
BENPORATH_SUZ12_TARGETS	0.00593429	0.0215398	3.87204	0.00748406	0.023785
BIOCARTA_41BB_PATHWAY	-0.0170697	0.265535	-3.87081	0.00749512	0.0238042
BAKER_HEMATOPOIESIS_STAT3_TARGETS	0.00985294	0.242706	3.87	0.0075024	0.0238113
DAZARD_UV_RESPONSE_CLUSTER_G24	0.0194025	0.130406	3.86893	0.00751209	0.023825
GENTILE_UV_HIGH_DOSE_DN	0.00826838	0.299533	3.86818	0.0075189	0.023825
FONTAINE_PAPILLARY_THYROID_CARCINOMA_DN	0.006481	0.10923	3.86785	0.00752182	0.023825
RICKMAN_HEAD_AND_NECK_CANCER_A	0.00583154	0.025654	3.86625	0.00753629	0.0238548
LINDSTEDT_DENDRITIC_CELL_MATURATION_C	-0.00558018	0.209525	-3.86375	0.007559	0.0239107
HENDRICKS_SMARCA4_TARGETS_DN	0.00835577	0.211871	3.86319	0.00756404	0.0239107
MCBRYAN_PUBERTAL_BREAST_3_4WK_DN	0.00792012	0.198313	3.86075	0.00758629	0.0239549
BIOCARTA_CELLCYCLE_PATHWAY	-0.00882846	0.279285	-3.86055	0.00758816	0.0239549
BOYAULT_LIVER_CANCER_SUBCLASS_G12_DN	-0.018658	0.156608	-3.85904	0.00760194	0.0239824
HIRSCH_CELLULAR_TRANSFORMATION_SIGNATURE_DN	0.00649192	0.292689	3.85741	0.00761682	0.0240133
DAWSON_METHYLATED_IN_LYMPHOMA_TCL1	0.0105879	0.152903	3.85553	0.00763407	0.0240516
KEGG_OLFACTORY_TRANSDUCTION	0.0129791	-0.0432565	3.85265	0.00766063	0.0241193
REACTOME_ROLE_OF_SECOND_MESSENGERS_IN_NETRIN1_SIGNALING	-0.0196081	-0.0188866	-3.85076	0.0076781	0.0241582
REACTOME_GRB2_EVENTS_IN_ERBB2_SIGNALING	0.00773773	0.334627	3.84276	0.00775242	0.0243758
YU_MYC_TARGETS_DN	-0.00845672	0.139993	-3.84007	0.00777764	0.0244388
LABBE_TARGETS_OF_TGFB1_AND_WNT3A_DN	0.00785598	0.232094	3.83933	0.00778459	0.0244406
MYLLYKANGAS_AMPLIFICATION_HOT_SPOT_25	-0.0117977	0.192722	-3.83884	0.00778918	0.0244406
PID_ALK2_PATHWAY	-0.0125482	0.145312	-3.83784	0.00779859	0.0244406
MIKKELSEN_ES_ICP_WITH_H3K27ME3	0.0159599	-0.0630865	3.83781	0.00779888	0.0244406
BOYLAN_MULTIPLE_MYELOMA_D_CLUSTER_UP	0.006507	0.183651	3.83669	0.00780936	0.0244573
REACTOME_RNA_POL_I_PROMOTER_OPENING	0.0180582	-0.083621	3.83582	0.0078176	0.0244669
CAIRO_HEPATOBLASTOMA_CLASSES_DN	0.0055151	0.139866	3.83266	0.00784744	0.024544
ZWANG_TRANSIENTLY_UP_BY_2ND_EGF_PULSE_ONLY	0.00566598	0.0120651	3.82954	0.00787711	0.0246205
REACTOME_ADHERENS_JUNCTIONS_INTERACTIONS	0.00820853	0.279991	3.82768	0.00789479	0.0246595
UEDA_CENTRAL_CLOCK	0.00778448	0.291702	3.82582	0.00791256	0.0246987
ROVERSI_GLIOMA_COPY_NUMBER_DN	0.00765875	0.217526	3.8245	0.00792515	0.0247216
DARWICHE_SQUAMOUS_CELL_CARCINOMA_UP	-0.0094692	0.247402	-3.82088	0.00795991	0.0248137
CHIARADONNA_NEOPLASTIC_TRANSFORMATION_KRAS_CDC25_DN	0.00770137	0.128453	3.81941	0.0079741	0.0248416
MISHRA_CARCINOMA_ASSOCIATED_FIBROBLAST_DN	0.0138929	0.315004	3.81845	0.00798333	0.024854
LE_NEURONAL_DIFFERENTIATION_UP	0.0143501	-0.0442787	3.81506	0.00801614	0.0249397
ODONNELL_TARGETS_OF_MYC_AND_TFRC_UP	0.00726735	0.162077	3.81219	0.00804406	0.0250101
BUDHU_LIVER_CANCER_METASTASIS_UP	0.0266543	0.0108684	3.81111	0.0080546	0.0250264
MCBRYAN_PUBERTAL_BREAST_3_4WK_UP	0.00567283	0.236045	3.8066	0.00809871	0.0251393
BIOCARTA_IL3_PATHWAY	0.00767796	0.281282	3.80562	0.00810827	0.0251393
REACTOME_G_BETA_GAMMA_SIGNALLING_THROUGH_PI3KGAMMA	-0.00912219	0.186201	-3.80544	0.00811007	0.0251393
GILDEA_METASTASIS	0.0146938	0.142122	3.80522	0.00811218	0.0251393
REACTOME_SYNTHESIS_OF_SUBSTRATES_IN_N_GLYCAN_BIOSYTHESIS	0.0212825	0.239126	3.7995	0.00816863	0.0252862
ONO_AML1_TARGETS_UP	0.0104731	0.142041	3.79933	0.0081703	0.0252862
ZHOU_INFLAMMATORY_RESPONSE_LIVE_UP	0.00878714	0.146468	3.79806	0.00818289	0.0253086
RAGHAVACHARI_PLATELET_SPECIFIC_GENES	0.00868465	0.231163	3.79562	0.00820714	0.025367
GARGALOVIC_RESPONSE_TO_OXIDIZED_PHOSPHOLIPIDS_RED_UP	-0.0207991	0.345764	-3.79428	0.00822055	0.0253803
COLLER_MYC_TARGETS_UP	-0.00913517	0.398054	-3.79411	0.00822215	0.0253803
CAFFAREL_RESPONSE_TO_THC_24HR_5_DN	-0.0116257	0.334688	-3.79226	0.00824068	0.025408
SMID_BREAST_CANCER_LUMINAL_A_UP	0.00829294	0.0239754	3.79214	0.0082419	0.025408
REACTOME_TRAF6_MEDIATED_IRF7_ACTIVATION	0.0139577	0.26512	3.7916	0.00824725	0.025408
BROWNE_HCMV_INFECTION_10HR_DN	0.0139324	0.26657	3.78799	0.0082835	0.0255031
FOSTER_KDM1A_TARGETS_DN	-0.00816005	0.245636	-3.78622	0.0083013	0.0255412
REACTOME_SIGNALING_BY_RHO_GTPASES	0.00861306	0.213959	3.78293	0.00833456	0.0256141
GOTTWEIN_TARGETS_OF_KSHV_MIR_K12_11	0.0067157	0.272965	3.7828	0.00833581	0.0256141
BIOCARTA_ERK_PATHWAY	0.0087878	0.35245	3.77889	0.00837556	0.0257195
MIKKELSEN_IPS_ICP_WITH_H3K27ME3	0.0114028	-0.0322292	3.77793	0.00838538	0.0257329
REACTOME_TRAF3_DEPENDENT_IRF_ACTIVATION_PATHWAY	0.0180326	0.287282	3.77705	0.00839436	0.0257438
REACTOME_GABA_A_RECEPTOR_ACTIVATION	0.0228195	-0.00781547	3.7736	0.0084296	0.0258351
KEGG_ASTHMA	-0.0396024	-0.187052	-3.77163	0.00844986	0.0258543
REACTOME_TRAFFICKING_OF_AMPA_RECEPTORS	0.00905627	0.262632	3.7716	0.00845009	0.0258543
CASORELLI_ACUTE_PROMYELOCYTIC_LEUKEMIA_UP	0.0103374	0.20225	3.77139	0.00845227	0.0258543
NABA_BASEMENT_MEMBRANES	0.00926026	0.062949	3.77038	0.0084627	0.0258695
KEGG_HEMATOPOIETIC_CELL_LINEAGE	0.00863555	0.00433783	3.76909	0.00847594	0.0258932
REACTOME_IL_7_SIGNALING	-0.0108754	0.160933	-3.76753	0.00849204	0.0259257
DOANE_BREAST_CANCER_CLASSES_UP	0.0085532	0.200824	3.76339	0.00853501	0.0260308
CHIANG_LIVER_CANCER_SUBCLASS_UNANNOTATED_UP	0.0128383	0.230338	3.76315	0.00853749	0.0260308
VALK_AML_WITH_CEBPA	0.00595307	0.235612	3.76164	0.00855322	0.026062
REACTOME_LIPOPROTEIN_METABOLISM	0.00979826	0.172196	3.76095	0.00856033	0.0260668
MIKKELSEN_ES_ICP_WITH_H3K4ME3_AND_H3K27ME3	0.0137736	0.0111	3.76025	0.00856772	0.0260726
KIM_MYCN_AMPLIFICATION_TARGETS_DN	0.0102327	0.200553	3.75932	0.00857734	0.026085
REACTOME_LIPID_DIGESTION_MOBILIZATION_AND_TRANSPORT	0.0094412	0.186004	3.75777	0.00859357	0.026098
REACTOME_MRNA_PROCESSING	-0.00820456	0.372639	-3.75735	0.00859796	0.026098
WANG_CLIM2_TARGETS_UP	-0.00682696	0.245515	-3.75734	0.00859815	0.026098
MAGRANGEAS_MULTIPLE_MYELOMA_IGG_VS_IGA_DN	0.00534828	0.197083	3.75648	0.00860713	0.0261085
MAINA_VHL_TARGETS_DN	0.0128175	0.232986	3.75153	0.00865922	0.0262468
MARSON_FOXP3_TARGETS_STIMULATED_UP	0.00980854	0.147839	3.75109	0.00866383	0.0262468
SHAFFER_IRF4_TARGETS_IN_MYELOMA_VS_MATURE_B_LYMPHOCYTE	0.00589477	0.315498	3.74752	0.00870164	0.0263238
BIOCARTA_CD40_PATHWAY	-0.0167202	0.192675	-3.74727	0.00870435	0.0263238
RHEIN_ALL_GLUCOCORTICOID_THERAPY_UP	0.00860721	0.213252	3.74712	0.00870596	0.0263238
WENG_POR_TARGETS_GLOBAL_DN	0.00987491	0.252683	3.74461	0.00873258	0.0263717
KIM_TIAL1_TARGETS	-0.0112232	0.332624	-3.74458	0.00873293	0.0263717
LI_INDUCED_T_TO_NATURAL_KILLER_UP	0.00845465	0.181735	3.7426	0.00875408	0.0264187
LEIN_LOCALIZED_TO_PROXIMAL_DENDRITES	0.00592129	0.169996	3.74015	0.00878037	0.0264811
PID_S1P_S1P4_PATHWAY	0.0054594	0.372738	3.73958	0.00878639	0.0264824
REACTOME_CREATION_OF_C4_AND_C2_ACTIVATORS	0.0256094	-0.0760393	3.73311	0.00885622	0.0266758
JIANG_CORE_DUPLICON_GENES	-0.0185714	-0.077864	-3.73126	0.00887623	0.0266999
GENTILE_UV_RESPONSE_CLUSTER_D5	0.00826539	0.288037	3.73106	0.0088784	0.0266999
GROSS_ELK3_TARGETS_UP	-0.00847166	0.223006	-3.73029	0.00888676	0.0266999
MULLIGHAN_NPM1_MUTATED_SIGNATURE_2_UP	-0.00623915	0.269363	-3.73029	0.0088868	0.0266999
DANG_REGULATED_BY_MYC_UP	-0.00970223	0.333848	-3.72866	0.00890444	0.0267359
BIOCARTA_GABA_PATHWAY	0.0145005	0.167925	3.72606	0.00893287	0.0268043
SHIN_B_CELL_LYMPHOMA_CLUSTER_1	-0.0151809	0.0945456	-3.7247	0.00894776	0.0268298
PEDRIOLI_MIR31_TARGETS_UP	0.00641918	0.109767	3.72391	0.00895636	0.0268298
CONRAD_GERMLINE_STEM_CELL	0.0128324	0.202528	3.72327	0.00896336	0.0268298
SMID_BREAST_CANCER_LUMINAL_B_UP	0.00780254	0.125138	3.72313	0.00896496	0.0268298
WOO_LIVER_CANCER_RECURRENCE_UP	0.00779099	0.208061	3.72269	0.00896974	0.0268298
LU_TUMOR_ANGIOGENESIS_UP	-0.00947378	0.17813	-3.71355	0.00907068	0.0271064
REACTOME_CALNEXIN_CALRETICULIN_CYCLE	0.0084802	0.423825	3.71328	0.00907368	0.0271064
KEGG_STEROID_BIOSYNTHESIS	0.0121259	0.222437	3.71247	0.0090827	0.0271162
SHAFFER_IRF4_TARGETS_IN_ACTIVATED_B_LYMPHOCYTE	0.00724163	0.348855	3.71049	0.00910481	0.0271651
COLINA_TARGETS_OF_4EBP1_AND_4EBP2	-0.00691709	0.236212	-3.70933	0.00911778	0.0271866
REACTOME_RESPONSE_TO_ELEVATED_PLATELET_CYTOSOLIC_CA2_	0.00772148	0.269249	3.70744	0.00913893	0.0272281
TOMLINS_PROSTATE_CANCER_UP	0.00718794	0.368749	3.70706	0.00914321	0.0272281
GINESTIER_BREAST_CANCER_20Q13_AMPLIFICATION_DN	-0.00760203	0.340441	-3.70417	0.00917565	0.0273075
NIKOLSKY_BREAST_CANCER_17P11_AMPLICON	-0.0129007	0.0286525	-3.69701	0.00925666	0.0275313
WAGSCHAL_EHMT2_TARGETS_UP	0.0380301	0.0249525	3.69574	0.00927107	0.0275568
BIOCARTA_VITCB_PATHWAY	-0.00796064	0.0565442	-3.6934	0.00929775	0.0276188
REACTOME_TRANSCRIPTION_COUPLED_NER_TC_NER	-0.0156895	0.274828	-3.69235	0.00930978	0.0276371
REACTOME_PLATELET_ACTIVATION_SIGNALING_AND_AGGREGATION	0.00600043	0.237909	3.68959	0.00934137	0.0276991
AUNG_GASTRIC_CANCER	-0.00604669	0.280854	-3.6895	0.00934238	0.0276991
MEINHOLD_OVARIAN_CANCER_LOW_GRADE_DN	-0.00874985	0.378377	-3.68424	0.00940305	0.0278546
BIOCARTA_AGR_PATHWAY	0.0108419	0.342197	3.68346	0.0094121	0.0278546
REACTOME_SIGNALING_BY_GPCR	0.00524906	0.068932	3.68301	0.00941723	0.0278546
BOYLAN_MULTIPLE_MYELOMA_PCA1_UP	0.0078521	0.0368611	3.68291	0.00941838	0.0278546
CASTELLANO_HRAS_AND_NRAS_TARGETS_UP	0.0109638	0.427861	3.68226	0.00942595	0.0278596
CHUNG_BLISTER_CYTOTOXICITY_DN	0.0105745	0.189085	3.6813	0.00943706	0.027875
NAKAMURA_METASTASIS_MODEL_UP	0.00955758	0.232364	3.68013	0.00945073	0.0278979
MATZUK_EARLY_ANTRAL_FOLLICLE	0.0276617	0.266441	3.67478	0.00951313	0.0280646
LEE_METASTASIS_AND_RNA_PROCESSING_UP	-0.00542783	0.372499	-3.67157	0.00955075	0.028158
REACTOME_SIGNALING_BY_FGFR3_MUTANTS	0.013839	-0.0516879	3.66938	0.00957663	0.0282168
ZWANG_EGF_INTERVAL_DN	0.00741698	0.209824	3.66805	0.00959235	0.0282438
LU_TUMOR_VASCULATURE_UP	0.0139795	-0.0230741	3.66754	0.00959828	0.0282438
GAZIN_EPIGENETIC_SILENCING_BY_KRAS	-0.00883328	0.224132	-3.66708	0.00960374	0.0282438
WALLACE_PROSTATE_CANCER_DN	0.029186	0.0588284	3.65967	0.00969197	0.0284787
CHNG_MULTIPLE_MYELOMA_HYPERPLOID_DN	-0.005775	0.367746	-3.65936	0.00969564	0.0284787
CHEN_LVAD_SUPPORT_OF_FAILING_HEART_UP	0.00676445	0.164959	3.64888	0.00982187	0.0288315
REACTOME_NUCLEOTIDE_EXCISION_REPAIR	-0.0143615	0.27677	-3.64693	0.00984557	0.0288757
WANG_CISPLATIN_RESPONSE_AND_XPC_UP	-0.00616458	0.241645	-3.64664	0.00984914	0.0288757
MANALO_HYPOXIA_UP	0.00845142	0.173196	3.64161	0.0099105	0.0290376
FERRARI_RESPONSE_TO_FENRETINIDE_UP	0.0142427	0.224724	3.63839	0.00995006	0.0291355
NAGASHIMA_NRG1_SIGNALING_DN	0.017655	0.196792	3.63499	0.00999198	0.0292402
HOEGERKORP_CD44_TARGETS_TEMPORAL_UP	-0.0124146	0.140577	-3.62891	0.0100675	0.0294246
HOLLEMAN_DAUNORUBICIN_B_ALL_DN	-0.00746821	0.350059	-3.62869	0.0100702	0.0294246
WATANABE_RECTAL_CANCER_RADIOTHERAPY_RESPONSIVE_DN	0.00596607	0.30164	3.62841	0.0100737	0.0294246
CLIMENT_BREAST_CANCER_COPY_NUMBER_UP	0.0126147	0.212039	3.627	0.0100913	0.0294492
LINDVALL_IMMORTALIZED_BY_TERT_DN	0.00621821	0.122031	3.62646	0.0100981	0.0294492
REACTOME_FATTY_ACYL_COA_BIOSYNTHESIS	-0.00549938	0.369857	-3.62624	0.0101008	0.0294492
REACTOME_SHC_MEDIATED_CASCADE	-0.00543244	0.161142	-3.62224	0.010151	0.0295775
REACTOME_OXYGEN_DEPENDENT_PROLINE_HYDROXYLATION_OF_HYPOXIA_INDUCIBLE_FACTOR_ALPHA	-0.0118371	0.29208	-3.62062	0.0101714	0.0296186
HUMMERICH_MALIGNANT_SKIN_TUMOR_UP	0.0166133	0.224858	3.61897	0.0101922	0.029661
ZHAN_MULTIPLE_MYELOMA_MF_UP	0.00842739	0.140553	3.61744	0.0102115	0.0296988
LOPEZ_TRANSLATION_VIA_FN1_SIGNALING	0.00599393	0.365502	3.61307	0.0102671	0.0298341
REACTOME_RESOLUTION_OF_AP_SITES_VIA_THE_MULTIPLE_NUCLEOTIDE_PATCH_REPLACEMENT_PATHWAY	-0.0169893	0.277995	-3.61279	0.0102706	0.0298341
REACTOME_TRANS_GOLGI_NETWORK_VESICLE_BUDDING	0.00514136	0.353113	3.61169	0.0102846	0.0298389
REACTOME_NEURONAL_SYSTEM	0.00593287	0.0907768	3.61167	0.0102849	0.0298389
FIGUEROA_AML_METHYLATION_CLUSTER_7_DN	-0.0305016	0.338392	-3.60949	0.0103128	0.0299015
KEGG_ALANINE_ASPARTATE_AND_GLUTAMATE_METABOLISM	-0.00859223	0.223889	-3.60859	0.0103243	0.0299021
MCCABE_HOXC6_TARGETS_UP	0.0216136	0.158827	3.60848	0.0103257	0.0299021
CHEMELLO_SOLEUS_VS_EDL_MYOFIBERS_UP	0.0156138	0.0668146	3.60452	0.0103766	0.0300312
HOLLEMAN_VINCRISTINE_RESISTANCE_ALL_UP	0.00700064	0.226011	3.60341	0.0103909	0.0300542
NUYTTEN_EZH2_TARGETS_UP	0.00664894	0.213517	3.59461	0.0105052	0.0303663
BERENJENO_ROCK_SIGNALING_NOT_VIA_RHOA_UP	0.0160089	0.214272	3.59334	0.0105218	0.0303957
JOSEPH_RESPONSE_TO_SODIUM_BUTYRATE_DN	-0.00553678	0.206919	-3.5894	0.0105735	0.0305263
REACTOME_NOREPINEPHRINE_NEUROTRANSMITTER_RELEASE_CYCLE	-0.00942716	0.0921404	-3.58868	0.0105829	0.0305349
IIZUKA_LIVER_CANCER_PROGRESSION_G2_G3_UP	0.0090526	0.184766	3.58755	0.0105979	0.0305403
REACTOME_ENDOSOMAL_SORTING_COMPLEX_REQUIRED_FOR_TRANSPORT_ESCRT	0.0124841	0.31046	3.58739	0.0105999	0.0305403
LEE_AGING_MUSCLE_UP	-0.00565482	0.297575	-3.58683	0.0106074	0.0305403
VICENT_METASTASIS_UP	-0.0217445	0.172036	-3.58658	0.0106106	0.0305403
LANDIS_ERBB2_BREAST_TUMORS_324_UP	0.00506138	0.335667	3.58508	0.0106306	0.030579
SANSOM_APC_TARGETS	-0.00557852	0.214081	-3.58396	0.0106453	0.0306028
PROVENZANI_METASTASIS_UP	-0.00584861	0.281275	-3.583	0.0106581	0.0306209
REACTOME_MRNA_DECAY_BY_3_TO_5_EXORIBONUCLEASE	-0.0141302	0.240878	-3.58196	0.0106719	0.0306419
ACEVEDO_LIVER_CANCER_WITH_H3K27ME3_UP	0.00770745	0.0750946	3.57608	0.0107504	0.0308414
BIOCARTA_CYTOKINE_PATHWAY	0.0260699	-0.153001	3.57578	0.0107544	0.0308414
LEE_INTRATHYMIC_T_PROGENITOR	0.00626491	0.210422	3.57523	0.0107617	0.0308438
REACTOME_PIP3_ACTIVATES_AKT_SIGNALING	0.00805332	0.297696	3.57439	0.0107731	0.0308575
PUJANA_ATM_PCC_NETWORK	-0.00573097	0.288173	-3.57363	0.0107832	0.0308678
MIKKELSEN_MEF_LCP_WITH_H3K4ME3	0.00900199	0.107512	3.57289	0.0107931	0.0308776
BIOCARTA_MET_PATHWAY	0.0110511	0.344936	3.57222	0.0108022	0.0308849
STEARMAN_LUNG_CANCER_EARLY_VS_LATE_DN	0.0121444	0.241102	3.57152	0.0108116	0.0308927
DARWICHE_PAPILLOMA_PROGRESSION_RISK	0.0082327	0.159271	3.57094	0.0108195	0.0308927
RODRIGUES_NTN1_TARGETS_DN	0.00515073	0.298696	3.57056	0.0108245	0.0308927
WILLERT_WNT_SIGNALING	0.00833177	0.227819	3.56812	0.0108576	0.0309683
SCHAEFFER_PROSTATE_DEVELOPMENT_AND_CANCER_BOX6_DN	-0.00767693	0.45524	-3.56747	0.0108664	0.0309748
LOPEZ_MBD_TARGETS_IMPRINTED_AND_X_LINKED	0.0103702	0.308134	3.56502	0.0108996	0.0310507
WU_HBX_TARGETS_3_DN	-0.0138438	0.186913	-3.56359	0.0109192	0.0310877
WEIGEL_OXIDATIVE_STRESS_RESPONSE	-0.00552319	0.328209	-3.55988	0.0109698	0.0312019
BIOCARTA_MCALPAIN_PATHWAY	0.0113674	0.30813	3.55969	0.0109725	0.0312019
ZHAN_MULTIPLE_MYELOMA_DN	-0.00894155	0.0742368	-3.55904	0.0109814	0.0312025
PID_TELOMERASE_PATHWAY	-0.00585914	0.316891	-3.55871	0.0109859	0.0312025
WINTER_HYPOXIA_METAGENE	0.00663854	0.261831	3.55804	0.0109951	0.0312101
VALK_AML_CLUSTER_8	0.00811984	0.234541	3.55529	0.0110329	0.0312836
HASINA_NOL7_TARGETS_DN	0.0121652	0.299306	3.55519	0.0110343	0.0312836
JONES_TCOF1_TARGETS	-0.0146225	0.235027	-3.5543	0.0110466	0.0312998
REACTOME_ORGANIC_CATION_ANION_ZWITTERION_TRANSPORT	0.03436	-0.0142461	3.55274	0.011068	0.0313418
GRAESSMANN_RESPONSE_TO_MC_AND_SERUM_DEPRIVATION_UP	0.00542581	0.147672	3.55166	0.011083	0.0313654
REACTOME_RNA_POL_III_TRANSCRIPTION	-0.00729591	0.267422	-3.55039	0.0111006	0.0313965
ZWANG_CLASS_1_TRANSIENTLY_INDUCED_BY_EGF	0.010525	0.208495	3.54355	0.0111961	0.0316474
SMID_BREAST_CANCER_ERBB2_UP	0.00620981	0.284285	3.54181	0.0112204	0.0316973
PID_CDC42_REG_PATHWAY	0.0103073	0.274462	3.53934	0.0112552	0.0317765
KEGG_RIBOFLAVIN_METABOLISM	-0.0088241	0.202885	-3.53885	0.0112621	0.0317771
SANSOM_APC_TARGETS_UP	-0.00637119	0.260151	-3.53752	0.0112809	0.0318054
LEIN_OLIGODENDROCYTE_MARKERS	0.00749283	0.230342	3.53719	0.0112856	0.0318054
TONKS_TARGETS_OF_RUNX1_RUNX1T1_FUSION_SUSTAINED_IN_GRANULOCYTE_DN	0.0224292	-0.199312	3.53314	0.0113429	0.031948
DANG_MYC_TARGETS_UP	-0.00887311	0.368105	-3.53246	0.0113526	0.0319562
PID_NEPHRIN_NEPH1_PATHWAY	-0.0105006	0.238086	-3.53064	0.0113785	0.03201
SANA_TNF_SIGNALING_DN	0.00572596	0.267195	3.53002	0.0113874	0.032016
ZHAN_MULTIPLE_MYELOMA_CD2_UP	0.010776	0.191205	3.52941	0.011396	0.0320198
HEIDENBLAD_AMPLICON_8Q24_UP	-0.0052329	0.257844	-3.52898	0.0114023	0.0320198
WATANABE_ULCERATIVE_COLITIS_WITH_CANCER_UP	0.0085181	0.205664	3.52821	0.0114132	0.0320314
RUTELLA_RESPONSE_TO_HGF_VS_CSF2RB_AND_IL4_UP	0.00502381	0.219529	3.52715	0.0114284	0.0320551
VANDESLUIS_NORMAL_EMBRYOS_DN	-0.00929211	0.157481	-3.5255	0.011452	0.0320843
ENGELMANN_CANCER_PROGENITORS_DN	0.014631	0.165577	3.52548	0.0114524	0.0320843
GREGORY_SYNTHETIC_LETHAL_WITH_IMATINIB	-0.00576865	0.225085	-3.52332	0.0114835	0.0321524
PID_SYNDECAN_2_PATHWAY	0.00559869	0.281127	3.52172	0.0115066	0.0321979
REACTOME_SIGNALLING_TO_RAS	-0.00689295	0.327038	-3.51863	0.0115511	0.0323035
MASRI_RESISTANCE_TO_TAMOXIFEN_AND_AROMATASE_INHIBITORS_UP	-0.00988948	-0.0411741	-3.51759	0.0115663	0.0323268
REACTOME_TGF_BETA_RECEPTOR_SIGNALING_ACTIVATES_SMADS	-0.00527541	0.363559	-3.51587	0.0115913	0.0323625
GHANDHI_BYSTANDER_IRRADIATION_UP	0.0104635	0.123718	3.51577	0.0115928	0.0323625
FUJIWARA_PARK2_HEPATOCYTE_PROLIFERATION_UP	0.0169212	0.120637	3.51446	0.0116118	0.0323967
PENG_GLUCOSE_DEPRIVATION_DN	-0.00506202	0.291298	-3.51343	0.0116268	0.0324194
PID_HDAC_CLASSIII_PATHWAY	0.00853872	0.262855	3.51132	0.0116577	0.0324864
MOREAUX_B_LYMPHOCYTE_MATURATION_BY_TACI_UP	0.00940899	0.144491	3.50797	0.0117069	0.0326043
REACTOME_NA_CL_DEPENDENT_NEUROTRANSMITTER_TRANSPORTERS	0.0118839	-0.0221674	3.50596	0.0117365	0.0326673
KATSANOU_ELAVL1_TARGETS_UP	0.00599686	0.148688	3.50061	0.0118157	0.0328685
KUMAR_AUTOPHAGY_NETWORK	-0.00542568	0.214079	-3.49648	0.0118773	0.0330016
REACTOME_GENERATION_OF_SECOND_MESSENGER_MOLECULES	-0.0168098	0.165165	-3.49605	0.0118837	0.0330016
DEN_INTERACT_WITH_LCA5	0.00669463	0.420517	3.496	0.0118845	0.0330016
FIGUEROA_AML_METHYLATION_CLUSTER_3_UP	0.00563609	0.153553	3.49357	0.0119208	0.033083
PID_AP1_PATHWAY	0.00491641	0.204577	3.49238	0.0119387	0.0331131
CHIN_BREAST_CANCER_COPY_NUMBER_DN	-0.0107121	0.249846	-3.49107	0.0119585	0.0331487
HOWLIN_CITED1_TARGETS_2_UP	0.0108969	0.304237	3.48629	0.0120307	0.0333292
WELCH_GATA1_TARGETS	-0.0113356	0.159266	-3.48414	0.0120633	0.0333746
LUDWICZEK_TREATING_IRON_OVERLOAD	0.0173141	0.183822	3.48399	0.0120655	0.0333746
HEDENFALK_BREAST_CANCER_BRCA1_VS_BRCA2	-0.00511231	0.336803	-3.48382	0.0120682	0.0333746
WOO_LIVER_CANCER_RECURRENCE_DN	0.00855877	0.148221	3.48213	0.0120938	0.0334115
PID_INTEGRIN2_PATHWAY	-0.00995446	-0.0490422	-3.48201	0.0120957	0.0334115
SINGH_NFE2L2_TARGETS	-0.00722442	0.341134	-3.4763	0.0121831	0.0336333
BIOCARTA_ARAP_PATHWAY	0.00600411	0.342517	3.45795	0.0124687	0.0344016
MOREIRA_RESPONSE_TO_TSA_DN	-0.01119	0.180115	-3.45417	0.0125284	0.0345463
WEST_ADRENOCORTICAL_CARCINOMA_VS_ADENOMA_DN	0.00851719	0.202564	3.44931	0.0126058	0.0347394
FREDERICK_PRKCI_TARGETS	-0.0114282	0.0949479	-3.44672	0.012647	0.0347998
PID_SYNDECAN_1_PATHWAY	0.0126359	0.094226	3.44667	0.0126479	0.0347998
LEE_NAIVE_T_LYMPHOCYTE	0.0145599	0.112155	3.44655	0.0126498	0.0347998
PID_PDGFRA_PATHWAY	0.012664	0.334258	3.4445	0.0126827	0.0348701
BRUINS_UVC_RESPONSE_VIA_TP53_GROUP_A	0.00531889	0.146099	3.4432	0.0127036	0.0349073
SIMBULAN_PARP1_TARGETS_UP	0.0132583	0.298017	3.43936	0.0127655	0.0350503
STAMBOLSKY_RESPONSE_TO_VITAMIN_D3_DN	0.00764403	0.142351	3.43906	0.0127705	0.0350503
LIN_MELANOMA_COPY_NUMBER_DN	0.00514027	0.312262	3.43537	0.0128303	0.035194
BARIS_THYROID_CANCER_DN	-0.00611378	0.332489	-3.43392	0.0128539	0.0352384
BROWNE_HCMV_INFECTION_20HR_UP	0.00493352	0.234018	3.43059	0.0129083	0.0353669
KEGG_ALLOGRAFT_REJECTION	-0.0214661	-0.00340737	-3.43005	0.0129171	0.0353706
GARGALOVIC_RESPONSE_TO_OXIDIZED_PHOSPHOLIPIDS_LIGHTYELLOW_DN	0.00761066	0.218841	3.42821	0.0129473	0.0354204
KEGG_METABOLISM_OF_XENOBIOTICS_BY_CYTOCHROME_P450	-0.0089743	0.0337475	-3.42803	0.0129503	0.0354204
KEGG_EPITHELIAL_CELL_SIGNALING_IN_HELICOBACTER_PYLORI_INFECTION	-0.00641031	0.241442	-3.4257	0.0129887	0.0355048
KEGG_HYPERTROPHIC_CARDIOMYOPATHY_HCM	0.00825838	0.166919	3.4245	0.0130083	0.035538
VARELA_ZMPSTE24_TARGETS_DN	0.00902759	0.170496	3.42302	0.0130329	0.0355845
SHEDDEN_LUNG_CANCER_GOOD_SURVIVAL_A12	0.00541494	0.138538	3.422	0.0130498	0.0355899
REACTOME_BRANCHED_CHAIN_AMINO_ACID_CATABOLISM	-0.0081078	0.271442	-3.42199	0.0130499	0.0355899
PELLICCIOTTA_HDAC_IN_ANTIGEN_PRESENTATION_UP	0.0106099	0.37504	3.41825	0.0131121	0.0357388
YAGUE_PRETUMOR_DRUG_RESISTANCE_UP	-0.01277	0.0631039	-3.41598	0.01315	0.0358215
SCIAN_CELL_CYCLE_TARGETS_OF_TP53_AND_TP73_UP	0.0133774	0.290712	3.41526	0.0131619	0.0358333
MCMURRAY_TP53_HRAS_COOPERATION_RESPONSE_UP	-0.0122637	0.0841446	-3.41193	0.0132177	0.0359647
BREDEMEYER_RAG_SIGNALING_NOT_VIA_ATM_UP	-0.00554431	0.157568	-3.41022	0.0132464	0.0360221
REACTOME_ENDOSOMAL_VACUOLAR_PATHWAY	-0.014415	0.225436	-3.40797	0.0132844	0.0361046
HIRSCH_CELLULAR_TRANSFORMATION_SIGNATURE_UP	0.0055583	0.242317	3.40654	0.0133086	0.0361495
REACTOME_NEUROTRANSMITTER_RECEPTOR_BINDING_AND_DOWNSTREAM_TRANSMISSION_IN_THE_POSTSYNAPTIC_CELL	0.0056513	0.136067	3.40212	0.0133838	0.0363328
BIOCARTA_TOB1_PATHWAY	0.0119214	0.198818	3.3998	0.0134233	0.0364192
NAKAMURA_CANCER_MICROENVIRONMENT_UP	0.0145437	0.00543191	3.39769	0.0134594	0.0364962
MATZUK_MALE_REPRODUCTION_SERTOLI	-0.00730662	0.209444	-3.39678	0.013475	0.0365177
BROWNE_HCMV_INFECTION_8HR_UP	0.00543314	0.236888	3.3943	0.0135176	0.0366122
GROSS_HYPOXIA_VIA_HIF1A_UP	-0.00694788	0.324383	-3.39218	0.0135542	0.0366902
KEGG_N_GLYCAN_BIOSYNTHESIS	0.00674006	0.258883	3.38954	0.0135999	0.0367928
BERGER_MBD2_TARGETS	0.0193104	-0.105231	3.38223	0.0137272	0.0370998
REACTOME_AMINO_ACID_TRANSPORT_ACROSS_THE_PLASMA_MEMBRANE	-0.0136587	0.199881	-3.38212	0.0137291	0.0370998
REACTOME_SIGNALING_BY_NOTCH1	0.00566183	0.257939	3.38055	0.0137566	0.0371531
ZHANG_RESPONSE_TO_CANTHARIDIN_DN	-0.0106396	0.351975	-3.37835	0.0137953	0.0372241
CASORELLI_ACUTE_PROMYELOCYTIC_LEUKEMIA_DN	-0.00627412	0.324327	-3.37816	0.0137987	0.0372241
BYSTRYKH_HEMATOPOIESIS_STEM_CELL_FLI1	-0.0138812	0.120086	-3.37646	0.0138286	0.0372836
BARRIER_CANCER_RELAPSE_NORMAL_SAMPLE_UP	0.0081168	0.1736	3.37601	0.0138366	0.037284
SCHRAETS_MLL_TARGETS_DN	0.012677	0.132371	3.37284	0.0138928	0.0374115
LIU_COMMON_CANCER_GENES	0.00768434	0.283501	3.37244	0.0138998	0.0374115
NAKAMURA_TUMOR_ZONE_PERIPHERAL_VS_CENTRAL_DN	0.00624615	0.263012	3.37094	0.0139264	0.0374619
KEGG_NEUROACTIVE_LIGAND_RECEPTOR_INTERACTION	0.00572701	-0.0902822	3.36889	0.013963	0.0375258
CREIGHTON_ENDOCRINE_THERAPY_RESISTANCE_4	0.00485824	0.220664	3.36859	0.0139684	0.0375258
NIKOLSKY_BREAST_CANCER_20Q11_AMPLICON	-0.00763043	0.31923	-3.36806	0.0139777	0.0375258
CREIGHTON_AKT1_SIGNALING_VIA_MTOR_UP	0.0129666	0.385622	3.36783	0.0139819	0.0375258
LASTOWSKA_NEUROBLASTOMA_COPY_NUMBER_UP	-0.00517015	0.25969	-3.36691	0.0139983	0.0375485
HUANG_GATA2_TARGETS_DN	-0.00831021	0.243122	-3.36627	0.0140097	0.0375578
KYNG_DNA_DAMAGE_BY_4NQO_OR_GAMMA_RADIATION	0.00693031	0.263513	3.36533	0.0140265	0.0375816
NUYTTEN_NIPP1_TARGETS_UP	0.00596759	0.191747	3.36405	0.0140496	0.0376221
RUTELLA_RESPONSE_TO_CSF2RB_AND_IL4_DN	0.00489326	0.223771	3.36137	0.0140979	0.0377076
QI_HYPOXIA	0.00705896	0.202092	3.36123	0.0141004	0.0377076
SCHAEFFER_PROSTATE_DEVELOPMENT_AND_CANCER_BOX4_DN	0.0137706	0.367431	3.36067	0.0141104	0.0377076
REACTOME_RAS_ACTIVATION_UOPN_CA2_INFUX_THROUGH_NMDA_RECEPTOR	0.00487802	0.241199	3.3605	0.0141134	0.0377076
PID_P38_ALPHA_BETA_PATHWAY	-0.0066299	0.246919	-3.35932	0.0141348	0.0377434
KEGG_MTOR_SIGNALING_PATHWAY	-0.00799359	0.281055	-3.35496	0.0142139	0.037933
KEGG_GLYCOSYLPHOSPHATIDYLINOSITOL_GPI_ANCHOR_BIOSYNTHESIS	-0.00757247	0.195938	-3.35401	0.0142311	0.0379578
BECKER_TAMOXIFEN_RESISTANCE_DN	0.0085507	0.214147	3.35254	0.014258	0.0379916
REACTOME_RNA_POL_III_TRANSCRIPTION_TERMINATION	-0.00961044	0.291564	-3.35244	0.0142599	0.0379916
BERTUCCI_MEDULLARY_VS_DUCTAL_BREAST_CANCER_DN	0.0073768	0.139388	3.35135	0.0142798	0.0380232
PETRETTO_LEFT_VENTRICLE_MASS_QTL_CIS_DN	-0.014554	0.295242	-3.35011	0.0143024	0.038062
PETRETTO_HEART_MASS_QTL_CIS_UP	-0.00546497	0.261848	-3.34909	0.0143211	0.0380902
GUENTHER_GROWTH_SPHERICAL_VS_ADHERENT_DN	0.00790152	0.337985	3.34727	0.0143545	0.0381577
GAUSSMANN_MLL_AF4_FUSION_TARGETS_E_UP	0.0083293	0.0884991	3.34662	0.0143665	0.038168
REACTOME_GLUCAGON_TYPE_LIGAND_RECEPTORS	-0.00799459	0.0976514	-3.34021	0.014485	0.0384614
KIM_RESPONSE_TO_TSA_AND_DECITABINE_UP	0.0114845	0.143022	3.33637	0.0145564	0.0386293
SENESE_HDAC1_TARGETS_DN	0.00471601	0.178658	3.33571	0.0145688	0.0386405
REACTOME_GABA_RECEPTOR_ACTIVATION	0.0061301	0.0815311	3.33272	0.0146248	0.0387673
BEGUM_TARGETS_OF_PAX3_FOXO1_FUSION_UP	0.00977853	0.119387	3.33052	0.014666	0.0388547
KEGG_SNARE_INTERACTIONS_IN_VESICULAR_TRANSPORT	0.00777525	0.25176	3.32867	0.0147009	0.0389254
ONGUSAHA_TP53_TARGETS	0.00708557	0.155259	3.32734	0.0147261	0.0389701
BIOCARTA_RELA_PATHWAY	-0.00804408	0.238008	-3.32351	0.0147988	0.0391406
SNIJDERS_AMPLIFIED_IN_HEAD_AND_NECK_TUMORS	0.0160513	0.272936	3.32244	0.0148191	0.0391723
TAVAZOIE_METASTASIS	0.0138468	0.0364965	3.32187	0.0148299	0.0391791
MIKKELSEN_ES_LCP_WITH_H3K4ME3	0.00547824	0.0575675	3.31899	0.0148849	0.0393024
SCHAEFFER_PROSTATE_DEVELOPMENT_48HR_DN	0.00715146	0.144497	3.3135	0.0149903	0.0395588
KENNY_CTNNB1_TARGETS_DN	-0.00751138	0.309247	-3.30854	0.0150862	0.0397896
MOOTHA_GLYCOLYSIS	-0.012965	0.257957	-3.30769	0.0151028	0.0398016
ZERBINI_RESPONSE_TO_SULINDAC_UP	0.00978031	0.231387	3.30744	0.0151076	0.0398016
VERNOCHET_ADIPOGENESIS	0.0187754	0.0834829	3.30575	0.0151405	0.0398661
BIOCARTA_PLCE_PATHWAY	0.0115542	0.217916	3.3049	0.0151569	0.039868
REACTOME_METABOLISM_OF_LIPIDS_AND_LIPOPROTEINS	0.0048974	0.224924	3.30485	0.0151581	0.039868
PARK_HSC_VS_MULTIPOTENT_PROGENITORS_DN	0.00572609	0.377015	3.30373	0.0151799	0.0399032
ZHANG_PROLIFERATING_VS_QUIESCENT	-0.00758735	0.35395	-3.30261	0.0152017	0.0399382
FONTAINE_THYROID_TUMOR_UNCERTAIN_MALIGNANCY_UP	0.00613103	0.30667	3.30152	0.0152232	0.0399724
REACTOME_ACTIVATION_OF_BH3_ONLY_PROTEINS	-0.00852831	0.269975	-3.29437	0.0153639	0.0403196
SCHLESINGER_METHYLATED_DE_NOVO_IN_CANCER	0.00905904	0.0357783	3.29204	0.0154102	0.0404186
LAIHO_COLORECTAL_CANCER_SERRATED_DN	-0.00722688	0.344318	-3.29076	0.0154357	0.040463
MIKKELSEN_MEF_ICP_WITH_H3K27ME3	0.00808928	-0.0328995	3.28923	0.0154662	0.0405205
THUM_MIR21_TARGETS_HEART_DISEASE_UP	0.0118755	-0.0437327	3.28744	0.0155018	0.0405914
BIOCARTA_TCRA_PATHWAY	-0.0517904	-0.0630354	-3.28671	0.0155165	0.0406075
REACTOME_P38MAPK_EVENTS	-0.00740272	0.360113	-3.28441	0.0155625	0.0407052
KEGG_VASOPRESSIN_REGULATED_WATER_REABSORPTION	0.00520544	0.294259	3.282	0.015611	0.0408094
BIOCARTA_INTEGRIN_PATHWAY	0.00578614	0.373032	3.28138	0.0156236	0.0408199
BENPORATH_MYC_MAX_TARGETS	-0.00539215	0.301811	-3.27984	0.0156545	0.0408781
MIKKELSEN_IPS_LCP_WITH_H3K4ME3	0.00663096	0.0577111	3.27934	0.0156647	0.0408822
SASSON_RESPONSE_TO_GONADOTROPHINS_UP	0.00612267	0.296721	3.27399	0.0157733	0.0411429
TERAMOTO_OPN_TARGETS_CLUSTER_6	-0.00749609	0.109967	-3.27282	0.0157971	0.0411821
FIGUEROA_AML_METHYLATION_CLUSTER_4_DN	0.0119532	0.077508	3.27167	0.0158207	0.0412211
NIKOLSKY_BREAST_CANCER_12Q13_Q21_AMPLICON	-0.00840842	0.242906	-3.27101	0.0158342	0.0412334
BIOCARTA_UCALPAIN_PATHWAY	0.00751411	0.415236	3.26427	0.0159727	0.0415713
BRACHAT_RESPONSE_TO_CAMPTOTHECIN_DN	-0.0087868	0.312469	-3.26268	0.0160056	0.0416339
YAMASHITA_LIVER_CANCER_STEM_CELL_UP	0.00610303	0.30891	3.25996	0.016062	0.0417576
CROONQUIST_STROMAL_STIMULATION_UP	0.0120758	0.129765	3.25924	0.016077	0.0417736
PID_HEDGEHOG_GLI_PATHWAY	0.00786083	0.32866	3.25632	0.0161377	0.0418907
REACTOME_DESTABILIZATION_OF_MRNA_BY_TRISTETRAPROLIN_TTP	-0.00754536	0.294568	-3.25623	0.0161398	0.0418907
YANG_MUC2_TARGETS_DUODENUM_6MO_UP	0.0114003	0.207	3.25487	0.0161682	0.0419316
SAKAI_CHRONIC_HEPATITIS_VS_LIVER_CANCER_DN	-0.00588325	0.128342	-3.25458	0.0161741	0.0419316
HOELZEL_NF1_TARGETS_DN	0.00653384	0.0695516	3.2542	0.0161821	0.0419316
REACTOME_IL_6_SIGNALING	-0.0175815	0.240683	-3.25332	0.0162006	0.0419566
REACTOME_GLYCEROPHOSPHOLIPID_BIOSYNTHESIS	-0.00542975	0.22862	-3.24937	0.0162836	0.0421483
TIEN_INTESTINE_PROBIOTICS_24HR_UP	-0.00721213	0.313973	-3.24524	0.016371	0.0423515
CAIRO_HEPATOBLASTOMA_DN	0.006863	0.109323	3.24134	0.0164541	0.042543
MEDINA_SMARCA4_TARGETS	0.00860137	0.247779	3.2407	0.0164676	0.0425548
REACTOME_ADENYLATE_CYCLASE_INHIBITORY_PATHWAY	0.00720435	0.18776	3.23828	0.0165194	0.0426653
PID_CIRCADIAN_PATHWAY	-0.0126087	0.265813	-3.23312	0.0166303	0.0429283
HOFFMANN_IMMATURE_TO_MATURE_B_LYMPHOCYTE_UP	0.00982355	0.155891	3.23106	0.0166748	0.0430172
DEMAGALHAES_AGING_UP	0.00489214	0.250417	3.23069	0.0166829	0.0430172
HOSHIDA_LIVER_CANCER_SURVIVAL_UP	0.00921556	0.175987	3.22882	0.0167234	0.0430845
GENTILE_UV_RESPONSE_CLUSTER_D2	0.0181074	0.253479	3.22864	0.0167273	0.0430845
BIOCARTA_SODD_PATHWAY	0.0109608	0.181917	3.22811	0.0167388	0.0430909
MARTINELLI_IMMATURE_NEUTROPHIL_UP	0.0149452	0.0878889	3.22544	0.016797	0.0432
BRACHAT_RESPONSE_TO_METHOTREXATE_DN	-0.0106863	0.264948	-3.22532	0.0167995	0.0432
WIERENGA_PML_INTERACTOME	0.00538176	0.366718	3.22339	0.0168417	0.043285
GAUSSMANN_MLL_AF4_FUSION_TARGETS_F_UP	0.00585968	0.123691	3.22188	0.0168748	0.0433466
JAATINEN_HEMATOPOIETIC_STEM_CELL_UP	-0.00752802	0.193616	-3.2199	0.0169183	0.0434347
REACTOME_SYNTHESIS_OF_BILE_ACIDS_AND_BILE_SALTS	0.0185515	0.0577649	3.2148	0.0170308	0.0436998
DARWICHE_PAPILLOMA_RISK_HIGH_UP	-0.00843722	0.245398	-3.21229	0.0170865	0.043819
REACTOME_ACTIVATION_OF_RAC	0.0103686	0.264498	3.21148	0.0171044	0.043841
REACTOME_REGULATION_OF_PYRUVATE_DEHYDROGENASE_PDH_COMPLEX	-0.0188639	0.248899	-3.21049	0.0171265	0.043874
FUJIWARA_PARK2_IN_LIVER_CANCER_DN	0.0121939	0.240592	3.20645	0.0172168	0.0440626
REACTOME_PI3K_EVENTS_IN_ERBB4_SIGNALING	0.00906654	0.28108	3.20596	0.0172278	0.0440626
REACTOME_REGULATION_OF_MITOTIC_CELL_CYCLE	-0.011546	0.351633	-3.20595	0.0172281	0.0440626
HECKER_IFNB1_TARGETS	0.013751	0.0981083	3.20469	0.0172563	0.0441033
ROETH_TERT_TARGETS_DN	-0.0207915	0.106131	-3.2044	0.0172627	0.0441033
KEGG_PYRUVATE_METABOLISM	-0.0110582	0.259551	-3.19907	0.017383	0.0443868
DAVICIONI_TARGETS_OF_PAX_FOXO1_FUSIONS_DN	0.0156618	0.158657	3.19797	0.017408	0.0444172
KANNAN_TP53_TARGETS_DN	0.00799305	0.209149	3.19772	0.0174137	0.0444172
DAZARD_UV_RESPONSE_CLUSTER_G4	0.0177724	0.294844	3.19612	0.0174499	0.0444855
KYNG_ENVIRONMENTAL_STRESS_RESPONSE_UP	0.00719613	0.309073	3.19503	0.0174747	0.0445059
ZIRN_TRETINOIN_RESPONSE_WT1_DN	0.00673002	0.217144	3.1949	0.0174778	0.0445059
MENSE_HYPOXIA_UP	0.0106033	0.247726	3.19453	0.0174862	0.0445059
MEISSNER_NPC_ICP_WITH_H3_UNMETHYLATED	0.00939911	0.0824733	3.19212	0.0175411	0.0446197
REACTOME_ANTIGEN_ACTIVATES_B_CELL_RECEPTOR_LEADING_TO_GENERATION_OF_SECOND_MESSENGERS	0.0115631	0.235098	3.19174	0.0175497	0.0446197
DOUGLAS_BMI1_TARGETS_DN	0.00730165	0.251197	3.19115	0.0175634	0.0446303
SUZUKI_RESPONSE_TO_TSA	0.0120656	0.240418	3.19074	0.0175728	0.0446303
BUCKANOVICH_T_LYMPHOCYTE_HOMING_ON_TUMOR_DN	-0.00637444	0.225723	-3.18587	0.0176846	0.0448903
KRISHNAN_FURIN_TARGETS_DN	0.00655721	0.137172	3.18496	0.0177058	0.044903
ZHAN_MULTIPLE_MYELOMA_CD1_AND_CD2_UP	0.00734186	0.198357	3.18475	0.0177105	0.044903
WEBER_METHYLATED_HCP_IN_SPERM_UP	-0.00824999	-0.00989556	-3.18442	0.0177181	0.044903
BANDRES_RESPONSE_TO_CARMUSTIN_MGMT_24HR_DN	-0.00530916	0.193298	-3.18373	0.0177342	0.0449196
WEI_MIR34A_TARGETS	-0.0078614	0.240831	-3.18289	0.0177536	0.0449448
REACTOME_PI3K_EVENTS_IN_ERBB2_SIGNALING	0.00983868	0.292444	3.18226	0.0177681	0.0449573
LEE_TARGETS_OF_PTCH1_AND_SUFU_UP	-0.00614902	0.184473	-3.18065	0.0178054	0.0450278
REACTOME_AMYLOIDS	0.0122801	-0.00488911	3.17612	0.0179111	0.0452708
WANG_RESPONSE_TO_BEXAROTENE_UP	-0.0073322	0.159941	-3.17374	0.017967	0.0453878
REACTOME_DOPAMINE_NEUROTRANSMITTER_RELEASE_CYCLE	-0.0105928	0.00658833	-3.17305	0.0179831	0.0453883
MCCLUNG_CREB1_TARGETS_UP	0.010322	0.173967	3.17291	0.0179864	0.0453883
BENPORATH_EED_TARGETS	0.00498735	0.0423018	3.17038	0.0180461	0.0455024
KEGG_MAPK_SIGNALING_PATHWAY	0.00447185	0.195194	3.17017	0.0180509	0.0455024
KAUFFMANN_MELANOMA_RELAPSE_DN	0.0110204	0.186789	3.15917	0.0183125	0.0461374
DACOSTA_UV_RESPONSE_VIA_ERCC3_XPCS_UP	0.00558512	0.221724	3.15796	0.0183415	0.0461859
REACTOME_REGULATION_OF_INSULIN_LIKE_GROWTH_FACTOR_IGF_ACTIVITY_BY_INSULIN_LIKE_GROWTH_FACTOR_BINDING_PROTEINS_IGFBPS	0.015561	0.015696	3.15612	0.0183855	0.0462503
KEGG_PRION_DISEASES	0.00802665	0.256504	3.15562	0.0183978	0.0462503
REACTOME_FRS2_MEDIATED_CASCADE	-0.00454224	0.223218	-3.15532	0.0184048	0.0462503
WONG_ENDMETRIUM_CANCER_DN	0.00734759	-0.063156	3.15526	0.0184062	0.0462503
MAHADEVAN_RESPONSE_TO_MP470_UP	0.0190267	0.0259002	3.15445	0.0184257	0.0462747
ASTON_MAJOR_DEPRESSIVE_DISORDER_UP	-0.0108442	0.139973	-3.1523	0.0184779	0.0463811
BIOCARTA_MYOSIN_PATHWAY	0.0148732	0.26781	3.15008	0.0185315	0.0464911
BROWNE_HCMV_INFECTION_2HR_DN	0.00565702	0.266485	3.14871	0.0185647	0.0465497
YAMAZAKI_TCEB3_TARGETS_DN	-0.00436564	0.295969	-3.14608	0.018629	0.0466861
OXFORD_RALA_TARGETS_DN	-0.0123923	0.294012	-3.14562	0.0186402	0.0466893
MARKEY_RB1_CHRONIC_LOF_DN	0.0093753	0.138465	3.14387	0.018683	0.0467409
VECCHI_GASTRIC_CANCER_ADVANCED_VS_EARLY_DN	0.00975094	0.18756	3.14384	0.0186836	0.0467409
OXFORD_RALA_AND_RALB_TARGETS_DN	0.00527078	0.234153	3.14356	0.0186904	0.0467409
ZHOU_INFLAMMATORY_RESPONSE_LPS_UP	0.00653165	0.121278	3.1416	0.0187386	0.0468365
MARTINEZ_TP53_TARGETS_DN	0.00436759	0.263817	3.13492	0.0189035	0.0472237
BIOCARTA_NKT_PATHWAY	-0.00932556	0.010589	-3.13329	0.0189438	0.0472995
PID_ARF_3PATHWAY	0.006485	0.394694	3.13065	0.0190095	0.0474386
PID_MYC_ACTIV_PATHWAY	-0.00465064	0.34244	-3.13013	0.0190226	0.0474463
WUNDER_INFLAMMATORY_RESPONSE_AND_CHOLESTEROL_DN	-0.0157782	-0.05222	-3.12573	0.0191329	0.047696
JAZAG_TGFB1_SIGNALING_VIA_SMAD4_UP	0.00988803	0.231317	3.1245	0.0191638	0.0477479
YAO_HOXA10_TARGETS_VIA_PROGESTERONE_DN	0.00867079	0.138428	3.1233	0.0191939	0.0477977
ABBUD_LIF_SIGNALING_1_UP	0.0134225	0.219394	3.12138	0.0192424	0.0478932
IIZUKA_LIVER_CANCER_PROGRESSION_L1_G1_DN	0.0132989	0.349218	3.1201	0.0192747	0.0479485
CAFFAREL_RESPONSE_TO_THC_8HR_5_DN	0.00857632	0.380318	3.1195	0.0192899	0.0479611
KEGG_PORPHYRIN_AND_CHLOROPHYLL_METABOLISM	-0.00845385	0.107263	-3.11831	0.0193201	0.0479967
DING_LUNG_CANCER_BY_MUTATION_RATE	0.0108221	0.204723	3.11814	0.0193245	0.0479967
CHIANG_LIVER_CANCER_SUBCLASS_INTERFERON_UP	0.00993561	0.0690342	3.1152	0.0193994	0.0481486
REACTOME_AMINO_ACID_AND_OLIGOPEPTIDE_SLC_TRANSPORTERS	-0.0124231	0.160823	-3.11494	0.0194061	0.0481486
LEE_SP4_THYMOCYTE	0.00760811	0.0582146	3.11336	0.0194464	0.0482233
ZHU_CMV_24_HR_DN	0.00593794	0.205303	3.11258	0.0194664	0.0482476
BIOCARTA_IL2_PATHWAY	-0.00576446	0.267511	-3.11217	0.0194767	0.0482481
LIANG_HEMATOPOIESIS_STEM_CELL_NUMBER_SMALL_VS_HUGE_UP	-0.00427608	0.278596	-3.11036	0.0195232	0.0483379
BLUM_RESPONSE_TO_SALIRASIB_UP	0.00584488	0.32771	3.10933	0.0195497	0.0483782
BARRIER_CANCER_RELAPSE_TUMOR_SAMPLE_DN	0.00640499	0.125051	3.1085	0.0195711	0.0484032
HELLEBREKERS_SILENCED_DURING_TUMOR_ANGIOGENESIS	0.00904079	0.146414	3.10814	0.0195803	0.0484032
BOYAULT_LIVER_CANCER_SUBCLASS_G3_DN	0.00663583	0.0872794	3.10749	0.0195971	0.0484195
COLLIS_PRKDC_SUBSTRATES	-0.00558044	0.362869	-3.10576	0.0196417	0.0485043
HADDAD_T_LYMPHOCYTE_AND_NK_PROGENITOR_UP	0.00994545	0.232426	3.10455	0.019673	0.0485562
HOWLIN_CITED1_TARGETS_2_DN	0.00709582	0.218603	3.10352	0.0196995	0.0485963
RICKMAN_METASTASIS_DN	0.007507	0.25647	3.10084	0.0197694	0.0487195
TESAR_JAK_TARGETS_MOUSE_ES_D3_DN	0.021424	0.082437	3.10081	0.0197701	0.0487195
REACTOME_INCRETIN_SYNTHESIS_SECRETION_AND_INACTIVATION	0.0130556	0.176902	3.0977	0.0198513	0.048883
REACTOME_RECYCLING_OF_BILE_ACIDS_AND_SALTS	0.0168845	-0.0632758	3.09747	0.0198571	0.048883
PID_WNT_NONCANONICAL_PATHWAY	-0.00856548	0.285424	-3.09642	0.0198847	0.0489254
BOYLAN_MULTIPLE_MYELOMA_C_CLUSTER_UP	-0.00874069	0.256901	-3.09401	0.019948	0.0490557
KEGG_AUTOIMMUNE_THYROID_DISEASE	-0.0159733	-0.0379496	-3.09112	0.0200241	0.0492172
MAGRANGEAS_MULTIPLE_MYELOMA_IGLL_VS_IGLK_DN	0.00816236	0.263979	3.08806	0.0201048	0.04939
PLASARI_TGFB1_TARGETS_1HR_DN	-0.0122486	0.276347	-3.08697	0.0201339	0.0494357
REACTOME_MEIOSIS	-0.00793244	0.0874474	-3.08494	0.0201877	0.049542
BIOCARTA_CCR3_PATHWAY	0.0118861	0.346224	3.08206	0.0202645	0.0497049
RADAEVA_RESPONSE_TO_IFNA1_DN	0.00763761	0.324422	3.07926	0.0203395	0.0498629
NIKOLSKY_BREAST_CANCER_7P15_AMPLICON	-0.00806393	0.15668	-3.07878	0.0203526	0.049869
