# Supplementary material for: m6A-dependent glycolysis enhances colorectal cancer progression
Source: Mol Cancer. 2020 Apr 3;19:72. doi: 10.1186/s12943-020-01190-w (PMC7118901; doi:10.1186/s12943-020-01190-w)
Supplement: Supplementary file 5 — Additional file 5 Table S3. Metabolites of glycolysis pathway measured by Liquid chromatography-coupled tandem mass spectrometry (LC-MS/MS) in HCT116 WT and METTL3-knockout cells. [file 12943_2020_1190_MOESM5_ESM.xlsx]

## Sheet: Table S3
Table S3. Metabolites of glycolysis pathway measured by Liquid chromatography-coupled tandem mass spectrometry (LC-MS/MS) in HCT116 WT and METTL3-knockout cells.
Component Name	WT1	WT2	WT3	METTL3-KO1	METTL3-KO2	METTL3-KO3
Phosphoenolpyruvate	4.76782e+06	2.58638e+07	2.37746e+06	3.98857e+06	3.55678e+06	2.63488e+06
Lactate	3.47172e+07	3.38288e+07	3.06841e+07	1.67618e+07	1.63585e+07	2.58793e+07
Pyruvate	247655	248637	245424	101524	87237.3	64372.8
D-Fructose 1,6-bisphosphate	1.35966e+07	1.62867e+07	1.61263e+07	6.12961e+06	1.0644e+07	1.11678e+07
Beta-D-Fructose 6-phosphate	6.30246e+06	7.36104e+06	4.5064e+06	6.70717e+06	7.15644e+06	6.95473e+06
3-Phospho-D-glycerate	8.41545e+06	3.92651e+07	5.61797e+06	7.91322e+06	8.28474e+06	6.93154e+06
D-Glucose 6-phosphate	3.71599e+07	3.04027e+07	4.79771e+07	1.6013e+07	2.24667e+07	2.58808e+07
