# Supplementary material for: m6A-dependent glycolysis enhances colorectal cancer progression
Source: Mol Cancer. 2020 Apr 3;19:72. doi: 10.1186/s12943-020-01190-w (PMC7118901; doi:10.1186/s12943-020-01190-w)
Supplement: Supplementary file 7 — Additional file 7 Table S5. Clinical information of 47 cases CRC patients in Cohort 1. [file 12943_2020_1190_MOESM7_ESM.xlsx]

## Sheet: Table S5
Table S5. Clinical information of 47 cases CRC patients in Cohort 1.
Patients	Gender	Age (years)	Histological differentiation	AJCC stage	Alive or dead	Survival time (months)
1	male	69	moderate	III	Alive	21
2	male	31	moderate	II	Alive	20
3	female	65	moderate	I	Alive	15
4	female	51	moderate	I	Alive	24
5	male	60	moderate	II	Alive	24
6	male	65	moderate	IV	Dead	14
7	male	71	moderate	I	Alive	18
8	female	67	moderate	III	Dead	16
9	male	82	moderate	II	Alive	18
10	male	56	moderate	II	Alive	21
11	male	53	moderate	IV	Dead	9
12	female	51	moderate	II	Alive	20
13	female	75	moderate	II	Alive	16
14	male	82	moderate	III	Alive	17
15	male	59	moderate	II	Alive	18
16	male	63	moderate	I	Alive	19
17	male	59	moderate	III	Alive	21
18	male	59	poor	I	Alive	24
19	male	54	moderate	II	Alive	20
20	female	53	moderate	II	Alive	14
21	male	77	moderate	II	Alive	16
22	male	71	moderate	III	Alive	16
23	female	70	moderate	III	Alive	15
24	male	62	moderate	II	Alive	17
25	male	58	poor	III	Alive	20
26	female	63	poor	IV	Dead	16
27	male	88	moderate	II	Alive	20
28	female	60	poor	III	Alive	22
29	male	87	moderate	III	Alive	18
30	male	73	moderate	II	Alive	19
31	male	62	moderate	IV	Dead	20
32	male	59	poor	III	Alive	14
33	male	79	moderate	III	Alive	20
34	female	69	high	I	Alive	6
35	male	64	moderate	III	Alive	23
36	female	75	moderate	IV	Alive	24
37	male	65	moderate	II	Alive	21
38	female	75	moderate	IV	Alive	20
39	male	73	moderate	II	Alive	19
40	male	31	moderate	IV	Alive	18
41	female	56	poor	II	Alive	21
42	male	29	moderate	IV	Alive	10
43	male	64	moderate	III	Alive	11
44	male	69	moderate	II	Alive	13
45	male	42	moderate	II	Alive	13
46	male	68	moderate	III	Alive	9
47	male	50	poor	I	Alive	11
