# Supplementary material for: m6A-dependent glycolysis enhances colorectal cancer progression
Source: Mol Cancer. 2020 Apr 3;19:72. doi: 10.1186/s12943-020-01190-w (PMC7118901; doi:10.1186/s12943-020-01190-w)
Supplement: Supplementary file 8 — Additional file 8 Table S6. Clinical information of 156 cases CRC patients in Cohort 2. [file 12943_2020_1190_MOESM8_ESM.xlsx]

## Sheet: Table S6
Table S6. Clinical information of 156 cases CRC patients in Cohort 2.
Patients	Gender	Age (years)	AJCC stage	Histological Differentiation	Recurrent or nonrecurrent	RFS time (months)
1	male	73	Ⅲ	moderate	nonrecurrent	51
2	male	42	Ⅲ	poor	nonrecurrent	29
3	female	62	Ⅲ	moderate	nonrecurrent	29
4	male	50	Ⅲ	moderate	nonrecurrent	28
5	male	69	Ⅲ	moderate	nonrecurrent	26
6	male	77	Ⅱ	moderate	nonrecurrent	25
7	male	65	Ⅱ	moderate	nonrecurrent	21
8	female	54	Ⅱ	poor	nonrecurrent	65
9	male	35	Ⅲ	poor	nonrecurrent	61
10	male	78	Ⅲ	moderate	nonrecurrent	59
11	male	32	Ⅱ	moderate	nonrecurrent	57
12	male	48	Ⅲ	moderate	nonrecurrent	57
13	female	54	Ⅲ	poor	nonrecurrent	56
14	male	51	Ⅱ	moderate	nonrecurrent	53
15	male	54	Ⅱ	poor	nonrecurrent	50
16	female	66	Ⅲ	poor	nonrecurrent	46
17	female	64	Ⅱ	moderate	nonrecurrent	44
18	male	64	Ⅱ	poor	nonrecurrent	43
19	female	51	Ⅲ	poor	nonrecurrent	43
20	female	68	Ⅲ	moderate	nonrecurrent	43
21	male	64	Ⅱ	moderate	nonrecurrent	42
22	male	65	Ⅲ	moderate	nonrecurrent	39
23	female	60	Ⅱ	moderate	nonrecurrent	39
24	male	42	Ⅲ	moderate	nonrecurrent	38
25	male	53	Ⅱ	moderate	nonrecurrent	38
26	female	66	Ⅱ	poor	nonrecurrent	37
27	female	73	Ⅲ	moderate	nonrecurrent	37
28	male	44	Ⅱ	poor	nonrecurrent	37
29	female	68	Ⅱ	moderate	nonrecurrent	36
30	male	63	Ⅱ	moderate	nonrecurrent	37
31	male	66	Ⅱ	poor	nonrecurrent	36
32	female	64	Ⅱ	moderate	nonrecurrent	36
33	male	44	Ⅱ	poor	nonrecurrent	36
34	female	61	Ⅱ	moderate	nonrecurrent	35
35	male	56	Ⅲ	poor	nonrecurrent	34
36	female	50	Ⅲ	moderate	nonrecurrent	33
37	male	68	Ⅱ	moderate	nonrecurrent	32
38	male	44	Ⅱ	moderate	nonrecurrent	30
39	female	57	Ⅱ	moderate	nonrecurrent	30
40	female	76	Ⅱ	poor	nonrecurrent	29
41	female	72	Ⅲ	moderate	nonrecurrent	29
42	male	72	Ⅱ	poor	nonrecurrent	29
43	male	39	Ⅱ	moderate	nonrecurrent	29
44	female	58	Ⅲ	moderate	nonrecurrent	29
45	female	76	Ⅱ	moderate	nonrecurrent	28
46	male	55	Ⅱ	moderate	nonrecurrent	28
47	female	66	Ⅲ	poor	nonrecurrent	28
48	female	55	Ⅱ	moderate	nonrecurrent	28
49	female	64	Ⅲ	moderate	nonrecurrent	28
50	male	57	Ⅱ	moderate	nonrecurrent	28
51	male	58	Ⅲ	moderate	nonrecurrent	28
52	male	69	Ⅱ	moderate	nonrecurrent	28
53	male	71	Ⅲ	poor	nonrecurrent	27
54	male	48	Ⅱ	moderate	nonrecurrent	27
55	male	59	Ⅱ	moderate	nonrecurrent	26
56	male	57	Ⅱ	moderate	nonrecurrent	26
57	male	45	Ⅱ	moderate	nonrecurrent	26
58	male	68	Ⅲ	moderate	nonrecurrent	25
59	male	63	Ⅲ	moderate	nonrecurrent	25
60	female	70	Ⅱ	moderate	nonrecurrent	25
61	female	62	Ⅲ	poor	nonrecurrent	25
62	male	51	Ⅲ	moderate	nonrecurrent	25
63	male	67	Ⅱ	moderate	nonrecurrent	25
64	female	67	Ⅱ	moderate	nonrecurrent	24
65	female	64	Ⅱ	moderate	nonrecurrent	23
66	female	67	Ⅱ	poor	nonrecurrent	23
67	male	64	Ⅱ	moderate	nonrecurrent	23
68	male	34	Ⅱ	moderate	nonrecurrent	23
69	male	62	Ⅱ	moderate	nonrecurrent	23
70	male	58	Ⅱ	moderate	nonrecurrent	23
71	male	39	Ⅲ	moderate	nonrecurrent	22
72	female	60	Ⅱ	well	nonrecurrent	21
73	male	70	Ⅱ	poor	nonrecurrent	20
74	male	55	Ⅱ	moderate	nonrecurrent	20
75	male	38	Ⅲ	poor	nonrecurrent	19
76	male	60	Ⅱ	moderate	nonrecurrent	19
77	male	46	Ⅱ	moderate	nonrecurrent	19
78	female	63	Ⅱ	poor	nonrecurrent	18
79	male	69	Ⅱ	poor	nonrecurrent	18
80	female	57	Ⅱ	moderate	nonrecurrent	17
81	male	61	Ⅱ	poor	nonrecurrent	17
82	female	78	Ⅱ	poor	nonrecurrent	17
83	male	50	Ⅲ	moderate	nonrecurrent	17
84	male	66	Ⅱ	poor	nonrecurrent	15
85	male	41	Ⅲ	poor	recurrent	20
86	male	62	Ⅲ	moderate	recurrent	8
87	male	75	Ⅲ	moderate	recurrent	18
88	male	65	Ⅲ	poor	recurrent	20
89	male	72	Ⅲ	poor	recurrent	33
90	male	59	Ⅱ	poor	recurrent	7
91	male	68	Ⅲ	moderate	recurrent	21
92	male	63	Ⅲ	poor	recurrent	17
93	male	64	Ⅲ	poor	recurrent	13
94	male	62	Ⅲ	poor	recurrent	15
95	female	45	Ⅲ	moderate	recurrent	14
96	male	54	Ⅲ	moderate	recurrent	8
97	male	68	Ⅲ	moderate	recurrent	18
98	female	46	Ⅱ	poor	recurrent	15
99	female	73	Ⅲ	moderate	recurrent	7
100	female	66	Ⅲ	poor	recurrent	10
101	male	79	Ⅲ	poor	recurrent	13
102	female	55	Ⅲ	poor	recurrent	10
103	female	61	Ⅲ	moderate	recurrent	10
104	male	60	Ⅲ	poor	recurrent	7
105	male	78	Ⅲ	poor	recurrent	7
106	male	69	Ⅱ	moderate	recurrent	13
107	female	57	Ⅲ	moderate	recurrent	19
108	male	68	Ⅲ	moderate	recurrent	35
109	female	64	Ⅲ	moderate	recurrent	12
110	female	61	Ⅱ	poor	recurrent	19
111	male	74	Ⅲ	moderate	recurrent	19
112	female	39	Ⅲ	poor	recurrent	28
113	male	42	Ⅲ	moderate	recurrent	42
114	male	60	Ⅲ	moderate	recurrent	13
115	male	55	Ⅱ	moderate	recurrent	8
116	male	55	Ⅲ	moderate	recurrent	7
117	male	63	Ⅲ	moderate	recurrent	20
118	male	62	Ⅱ	moderate	recurrent	37
119	male	71	Ⅲ	moderate	recurrent	22
120	female	56	Ⅲ	moderate	recurrent	31
121	female	56	Ⅲ	moderate	recurrent	13
122	male	54	Ⅲ	moderate	recurrent	7
123	male	60	Ⅲ	moderate	recurrent	16
124	female	55	Ⅱ	poor	recurrent	22
125	female	56	Ⅱ	moderate	recurrent	13
126	female	60	Ⅲ	poor	recurrent	7
127	female	75	Ⅱ	moderate	recurrent	7
128	female	51	Ⅲ	poor	recurrent	32
129	female	61	Ⅲ	poor	recurrent	11
130	male	77	Ⅲ	poor	recurrent	30
131	female	73	Ⅲ	poor	recurrent	7
132	male	61	Ⅱ	moderate	recurrent	10
133	male	74	Ⅱ	moderate	recurrent	7
134	male	50	Ⅱ	moderate	recurrent	7
135	male	78	Ⅱ	moderate	recurrent	13
136	male	72	Ⅲ	poor	recurrent	7
137	male	65	Ⅱ	moderate	recurrent	19
138	female	69	Ⅲ	poor	recurrent	11
139	male	64	Ⅲ	moderate	recurrent	25
140	female	62	Ⅱ	moderate	recurrent	16
141	male	68	Ⅱ	poor	recurrent	8
142	female	61	Ⅱ	moderate	recurrent	10
143	female	63	Ⅲ	moderate	recurrent	12
144	male	67	Ⅱ	moderate	recurrent	15
145	male	74	Ⅱ	moderate	recurrent	21
146	male	69	Ⅲ	moderate	recurrent	12
147	male	71	Ⅲ	moderate	recurrent	20
148	male	59	Ⅲ	moderate	recurrent	9
149	male	55	Ⅲ	poor	recurrent	8
150	male	55	Ⅱ	moderate	recurrent	12
151	male	68	Ⅲ	poor	recurrent	7
152	male	73	Ⅱ	poor	recurrent	12
153	male	58	Ⅱ	moderate	recurrent	7
154	male	63	Ⅲ	poor	recurrent	7
155	male	63	Ⅲ	poor	recurrent	8
156	female	65	Ⅲ	poor	recurrent	7
