# Supplementary material for: m6A-dependent glycolysis enhances colorectal cancer progression
Source: Mol Cancer. 2020 Apr 3;19:72. doi: 10.1186/s12943-020-01190-w (PMC7118901; doi:10.1186/s12943-020-01190-w)
Supplement: Supplementary file 9 — Additional file 9 Table S7. Clinical information of 30 cases CRC patients in GSE110225. [file 12943_2020_1190_MOESM9_ESM.xlsx]

## Sheet: Table S7
Table S7. Clinical information of 30 cases CRC patients in GSE110225.
Patients	Tissue	Anatomic location	Presence of synchronous distant metastasis	Suv pet variable values
GSM2982907	primary colorectal adenocarcinoma	coecum	No	19.4544
GSM2982909	primary colorectal adenocarcinoma	rectosigmoid	No	13.019
GSM2982911	primary colorectal adenocarcinoma	c.ascending	No	4.25
GSM2982913	primary colorectal adenocarcinoma	c.ascending	No	9.237
GSM2982915	primary colorectal adenocarcinoma	right colic flexure	No	1.759
GSM2982917	primary colorectal adenocarcinoma	rectum	Yes	6.52
GSM2982919	primary colorectal adenocarcinoma	sigmoid	No	4.968
GSM2982921	primary colorectal adenocarcinoma	right colic flexure	No	2.37
GSM2982923	primary colorectal adenocarcinoma	coecum	Yes	12.4
GSM2982925	primary colorectal adenocarcinoma	right colic flexure	Yes	3.03
GSM2982927	primary colorectal adenocarcinoma	rectum	No	5.686
GSM2982929	primary colorectal adenocarcinoma	left colic flexure	No	2.488
GSM2982931	primary colorectal adenocarcinoma	sigmoid	Yes	10.24
GSM2982933	primary colorectal adenocarcinoma	coecum	Yes	24.2
GSM2982935	primary colorectal adenocarcinoma	descending colon	No	10.3364
GSM2982937	primary colorectal adenocarcinoma	rectum	No	13.4986
GSM2982939	primary colorectal adenocarcinoma	sigmoid	No	19.813
GSM2982941	primary colorectal adenocarcinoma	sigmoid	No	23.415
GSM2982943	primary colorectal adenocarcinoma	coecum	No	25.2181
GSM2982945	primary colorectal adenocarcinoma	rectum	No	15.4278
GSM2982947	primary colorectal adenocarcinoma	coecum	Yes	18.37
GSM2982949	primary colorectal adenocarcinoma	descending colon	No	25
GSM2982951	primary colorectal adenocarcinoma	ascending colon	No	15.7757
GSM2982953	primary colorectal adenocarcinoma	descending colon	No	21.5
GSM2982955	primary colorectal adenocarcinoma	sigmoid	No	21.7
GSM2982957	primary colorectal adenocarcinoma	coecum	No	26.698
GSM2982959	primary colorectal adenocarcinoma	rectosigmoid	No	15.933
GSM2982961	primary colorectal adenocarcinoma	ascending colon	No	27.3
GSM2982963	primary colorectal adenocarcinoma	ascending colon	No	5.03428
GSM2982965	primary colorectal adenocarcinoma	right colic flexure	No	8.487
